# Supplementary material
Source: PubMed Central journal article supplement (PMC10087287)
Supplement: NIHMS1868161-supplement-34008967_YvesPommier_supplematerial1.pdf [file NIHMS1868161-supplement-34008967_YvesPommier_supplematerial1.pdf]

Compound SMILES    Top1 cleav: TDP1 inhibi HCT116 GI DU145 GI5 MCF-7 GI5(A549 GI50( MCF-7/TDP

|     |                |     |       |       |       |       |       |       |       |       |       |       |       |       |      |      |      |    |     |
|-----|----------------|-----|-------|-------|-------|-------|-------|-------|-------|-------|-------|-------|-------|-------|------|------|------|----|-----|
| A1  | O=C1C2=C(+     |     | 0     | 1.27  | jÀ    | 0.1   | 25.21 | jÀ    | 0.    | 14.49 | jÀ    | 1.    | 10.98 | jÀ    | 0.95 |      |      |    |     |
| A2  | O=C1C2=C(+     |     | 0     | 6.79  | jÀ    | 0.5   | 10.88 | jÀ    | 0.    | 13.01 | jÀ    | 3.    | 11.86 | jÀ    | 2.08 |      |      |    |     |
| A3  | O=C1C2=C(+     |     | 0     | 3.22  | jÀ    | 0.1   | 15.39 | jÀ    | 0.    | 83.26 | jÀ    | 5.    | 2.61  | jÀ    | 0.39 |      |      |    |     |
| A4  | O=C1C2=C(+     |     | 0     | 5.66  | jÀ    | 1.2   | 24.98 | jÀ    | 0.    | 13.20 | jÀ    | 0.    | 4.96  | jÀ    | 0.68 |      |      |    |     |
| A5  | O=C1C2=C(+     |     | 0     | 6.92  | jÀ    | 0.2   | 27.15 | jÀ    | 0.    | 11.67 | jÀ    | 0.    | 11.95 | jÀ    | 0.84 |      |      |    |     |
| A6  | O=C1C2=C(      | 0   | 0     | 94.05 | jÀ    | 1.    | 3.53  | jÀ    | 1.9   | 91.30 | jÀ    | 5.    | 65.14 | jÀ    | 8.90 |      |      |    |     |
| A7  | O=C1C2=C(      | 0   | 22%   | 12.18 | jÀ    | 1.    | 60.27 | jÀ    | 0.    | 54.67 | jÀ    | 4.    | 12.18 | jÀ    | 1.54 |      |      |    |     |
| A8  | O=C1C2=C(+     |     | 57%   | 0.78  | jÀ    | 0.1   | 15.57 | jÀ    | 0.    | 63.56 | jÀ    | 13    | 2.75  | jÀ    | 0.11 |      |      |    |     |
| A9  | O=C1C2=C(+     |     | 0     | 2.18  | jÀ    | 0.1   | 3.77  | jÀ    | 0.0   | 9.71  | jÀ    | 2.4   | 0.94  | jÀ    | 0.06 |      |      |    |     |
| A10 | O=C1C2=C(+     |     | 42%   | 6.55  | jÀ    | 0.6   | 12.34 | jÀ    | 0.    | 2.28  | jÀ    | 0.6   | 6.41  | jÀ    | 0.34 |      |      |    |     |
| A11 | O=C1C2=C(      | 0   | 0     | 13.24 | jÀ    | 2.    | 18.17 | jÀ    | 0.    | 7.26  | jÀ    | 1.8   | 17.05 | jÀ    | 0.92 |      |      |    |     |
| A12 | O=C1C2=C(ND    | ND  | 9.84  | jÀ    | 0.8   | 6.72  | jÀ    | 0.2   | 21.69 | jÀ    | 4.    | 17.72 | jÀ    | 1.70  |      |      |      |    |     |
| A13 | O=C1C2=C(O/+   | 15  | jÀ    | 2.2   | 6.93  | jÀ    | 0.4   | 1.88  | jÀ    | 0.1   | 2.65  | jÀ    | 0.1   | 6.68  | jÀ   | 0.31 |      |    |     |
| B1  | O=C1C2=C(+     |     | 0     | 2.01  | jÀ    | 0.1   | 9.94  | jÀ    | 0.6   | 8.85  | jÀ    | 1.1   | 0.79  | jÀ    | 0.08 |      |      |    |     |
| B2  | O=C1C2=C(+     | 26  | jÀ    | 0.75  | 6.34  | jÀ    | 0.8   | 17.38 | jÀ    | 0.    | 10.98 | jÀ    | 0.    | 12.31 | jÀ   | 0.73 |      |    |     |
| B3  | O=C1C2=C(+     | 12% | 49.77 | jÀ    | 6.    | 68.10 | jÀ    | 18    | 5.20  | jÀ    | 1.6   | 13.07 | jÀ    | 2.82  |      |      |      |    |     |
| B4  | O=C1C2=C(      | 0   | 0     | 12.90 | jÀ    | 0.    | 30.97 | jÀ    | 0.    | 10.61 | jÀ    | 2.    | 8.58  | jÀ    | 0.55 |      |      |    |     |
| B5  | O=C1C2=C(++    |     | 0     | 11.10 | jÀ    | 0.    | 2.04  | jÀ    | 0.5   | 81.31 | jÀ    | 2.    | 65.53 | jÀ    | 7.45 |      |      |    |     |
| B6  | O=C1C2=C(+     | 49% | 4.17  | jÀ    | 1.1   | 20.46 | jÀ    | 0.    | 2.73  | jÀ    | 0.8   | 3.78  | jÀ    | 0.44  |      |      |      |    |     |
| B7  | O=C1C2=C(+     | 15% | 1.26  | jÀ    | 0.0   | 1.41  | jÀ    | 0.5   | 0.53  | jÀ    | 0.0   | 1.22  | jÀ    | 0.14  |      |      |      |    |     |
| B8  | O=C1C2=C(      | 0   | 0     | 9.76  | jÀ    | 0.6   | 4.51  | jÀ    | 0.7   | 2.26  | jÀ    | 0.0   | 2.33  | jÀ    | 0.76 |      |      |    |     |
| C1  | O=C1C2=C(+     |     | 0     | 1.13  | jÀ    | 0.0   | 0.86  | jÀ    | 0.0   | 1.51  | jÀ    | 0.2   | 6.66  | jÀ    | 0.08 |      |      |    |     |
| C2  | O=C1C2=C(+++   |     | 0     | 0.93  | jÀ    | 0.1   | 0.28  | jÀ    | 0.0   | 1.44  | jÀ    | 0.2   | 7.95  | jÀ    | 0.37 |      |      |    |     |
| C3  | O=C1C2=C(      | 0   | 0     | 10.12 | jÀ    | 0.    | 11.68 | jÀ    | 0.    | 5.44  | jÀ    | 0.5   | 6.87  | jÀ    | 1.11 |      |      |    |     |
| C4  | O=C1C2=C(+++   |     | 0     | 0.24  | jÀ    | 0.0   | 0.91  | jÀ    | 0.0   | 0.57  | jÀ    | 0.0   | 2.40  | jÀ    | 0.36 |      |      |    |     |
| C5  | O=C1C2=C(++++) | ND  | 1.18  | jÀ    | 0.1   | 0.32  | jÀ    | 0.0   | 2.99  | jÀ    | 0.0   | 3.13  | jÀ    | 0.82  |      |      |      |    |     |
| C6  | O=C1C2=C(++    |     | 0     | 4.35  | jÀ    | 0.7   | 3.82  | jÀ    | 0.9   | 10.30 | jÀ    | 2.    | 9.27  | jÀ    | 0.32 |      |      |    |     |
| C7  | O=C1C2=C(+++   |     | 0     | 2.92  | jÀ    | 0.7   | 0.52  | jÀ    | 0.0   | 10.18 | jÀ    | 0.    | 2.28  | jÀ    | 0.88 |      |      |    |     |
| C8  | O=C1C2=C(+++   |     | 0     | 0.14  | jÀ    | 0.0   | 0.32  | jÀ    | 0.0   | 0.20  | jÀ    | 0.0   | 1.61  | jÀ    | 0.06 |      |      |    |     |
| C9  | O=C1C2=C(++    |     | 0     | 5.21  | jÀ    | 0.2   | 1.00  | jÀ    | 0.0   | 12.74 | jÀ    | 0.    | 1.49  | jÀ    | 0.14 |      |      |    |     |
| C10 | O=C1C2=C(+     | 27  | jÀ    | 0.51  | 8.41  | jÀ    | 0.2   | 4.13  | jÀ    | 0.8   | 8.54  | jÀ    | 0.9   | 12.21 | jÀ   | 0.59 |      |    |     |
| C11 | O=C1C2=C(      | 0   | 0     | 13.41 | jÀ    | 0.    | 40.21 | jÀ    | 0.    | 21.76 | jÀ    | 7.    | 12.81 | jÀ    | 0.83 |      |      |    |     |
| C12 | O=C1C2=C(+++   | 19  | jÀ    | 0.91  | 1.44  | jÀ    | 0.2   | 0.80  | jÀ    | 0.0   | 0.77  | jÀ    | 0.1   | 1.11  | jÀ   | 0.0  | 2.59 | jÀ | 0.3 |
| C13 | O=C1C2=C(+     | 15  | jÀ    | 0.31  | 4.38  | jÀ    | 0.6   | 0.44  | jÀ    | 0.0   | 0.53  | jÀ    | 0.0   | 3.09  | jÀ   | 1.17 |      |    |     |
| C14 | O=C1C2=C(+++   |     | 0     | 2.79  | jÀ    | 0.1   | 1.22  | jÀ    | 0.0   | 3.24  | jÀ    | 0.1   | 10.35 | jÀ    | 0.17 |      |      |    |     |
| C15 | O=C1C2=C(+     | 49% | 4.21  | jÀ    | 0.8   | 3.27  | jÀ    | 0.8   | 6.95  | jÀ    | 1.9   | 1.86  | jÀ    | 0.93  |      |      |      |    |     |
| C16 | O=C1C2=C(+     |     | 0     | 0.90  | jÀ    | 0.0   | 6.61  | jÀ    | 0.3   | 2.79  | jÀ    | 0.2   | 3.35  | jÀ    | 0.40 |      |      |    |     |
| C17 | O=C1C2=C(      | 0   | 0     | 41.56 | jÀ    | 4.    | 7.88  | jÀ    | 1.1   | 42.20 | jÀ    | 2.    | 34.71 | jÀ    | 2.26 |      |      |    |     |
| C18 | O=C1C2=C(+     |     | 0     | 9.35  | jÀ    | 0.6   | 1.14  | jÀ    | 0.4   | >100  |       | >100  |       |       |      |      |      |    |     |
| C19 | O=C1C2=C(+     | 53  | jÀ    | 1.5   | 0.63  | jÀ    | 0.1   | 3.11  | jÀ    | 2.7   | 6.26  | jÀ    | 3.0   | 3.93  | jÀ   | 0.73 |      |    |     |
| C20 | O=C1C2=C(+     |     | 0     | 8.48  | jÀ    | 0.3   | >100  |       | 93.35 | jÀ    | 3.    | 84.94 | jÀ    | 1.82  |      |      |      |    |     |
| C21 | O=C1C2=C(      | 0   | 0     | 26.17 | jÀ    | 0.    | 71.73 | jÀ    | 0.    | 24.40 | jÀ    | 6.    | 40.45 | jÀ    | 0.95 |      |      |    |     |
| C22 | O=C1C2=C(      | 0   | 0     | 11.31 | jÀ    | 0.    | 11.25 | jÀ    | 0.    | >100  |       | 2.79  | jÀ    | 0.35  |      |      |      |    |     |
| C23 | O=C1C2=C(+     |     | 0     | 11.56 | jÀ    | 1.    | 15.78 | jÀ    | 4.    | 24.63 | jÀ    | 5.    | 23.74 | jÀ    | 1.89 |      |      |    |     |
| C24 | O=C1C2=C(      | 0   | 0     | >100  |       | 2.90  | jÀ    | 0.8   | 7.22  | jÀ    | 2.3   | 12.71 | jÀ    | 3.61  |      |      |      |    |     |
| C25 | O=C1C2=C(O/+   | 54  | jÀ    | 1.0   | 10.15 | jÀ    | 0.    | 0.26  | jÀ    | 0.0   | 10.72 | jÀ    | 0.    | 40.35 | jÀ   | 1.   | .96  |    |     |

|     |              |                                                             |
|-----|--------------|-------------------------------------------------------------|
| C26 | O=C1C2=C(O/+ | 19 jÀ 0.35 9.93 jÀ 0.3 25.43 jÀ 0. 0.35 jÀ 0.0 1.53 jÀ 1.10 |
| C27 | O=C1C2=C(    | 0 0 > 100 > 100 > 100 66.61 jÀ 1.92                         |
| C28 | O=C1C2=C(O/+ | 0 12.88 jÀ 0. 41.67 jÀ 0. 2.70 jÀ 0.7 10.81 jÀ 0.81         |
| C29 | O=C1C2=C(+   | 44% 1.21 jÀ 0.6 0.29 jÀ 0.0 1.66 jÀ 0.2 1.76 jÀ 0.39        |
| C30 | O=C1C2=C(++  | 0 26.19 jÀ 2. 15.40 jÀ 0. 3.62 jÀ 0.3 8.47 jÀ 0.76          |

'1 GI50(1M)
