# Supplementary material
Source: PubMed Central journal article supplement (PMC10087287)
Supplement: NIHMS1868161-supplement-34008967_YvesPommier_supplematerial2.pdf [file NIHMS1868161-supplement-34008967_YvesPommier_supplematerial2.pdf]

# Supporting Information

## Synthesis of Methoxy-, Methyleneedioxy-, Hydroxy-, and Halo-Substituted Benzophenanthridinone Derivatives as DNA Topoisomerase IB (TOP1) and Tyrosyl-DNA Phosphodiesterase 1 (TDP1) Inhibitors and Their Biological Activity for Drug-Resistant Cancer

*De-Xuan Hu*<sup>†</sup>, *Wen-Lin Tang*<sup>†</sup>, *Yu Zhang*<sup>†</sup>, *Hao Yang*<sup>†</sup>, *Wenjie Wang*<sup>‡</sup>, *Keli Agama*<sup>‡</sup>, *Yves Pommier*<sup>‡,\*</sup> and *Lin-Kun An*<sup>†,¶\*</sup>

<sup>†</sup>School of Pharmaceutical Sciences, Sun Yat-sen University, Guangzhou 510006, China

<sup>‡</sup>Developmental Therapeutics Branch and Laboratory of Molecular Pharmacology, Center for Cancer Research, National Cancer Institute, National Institutes of Health, Bethesda, Maryland 20892, United States

<sup>¶</sup>Guangdong Provincial Key Laboratory of New Drug Design and Evaluation, Guangzhou 510006, China

To whom correspondence should be addressed: [pommier@nih.gov](mailto:pommier@nih.gov); [lssalk@mail.sysu.edu.cn](mailto:lssalk@mail.sysu.edu.cn)

## Content

|                                                                               |     |
|-------------------------------------------------------------------------------|-----|
| <b>Figure S1.</b> The structures of natural benzo[c]phenanthridine alkaloids. | S3  |
| <b>Figure S2.</b> The structure of LMP744.                                    | S4  |
| <b>Figure S3.</b> The TOP2 relaxing assay gel of <b>C12</b> .                 | S5  |
| <b>Figure S4.</b> Hypothetical binding mode of <b>C26</b> with TOP1cc.        | S6  |
| <b>Figure S5.</b> The HPLC profile of compound <b>C12</b> .                   | S7  |
| Characterization Data of the Intermediates.                                   | S8  |
| Characterization Data of the Target Products.                                 | S23 |
| <sup>1</sup> H NMR and <sup>13</sup> C NMR spectra of the Target Products     | S47 |
| References                                                                    | S98 |

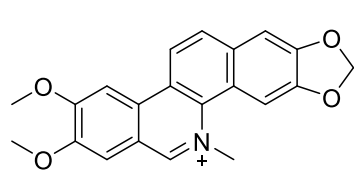

Nitidine

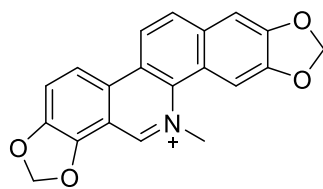

Sanguinarine

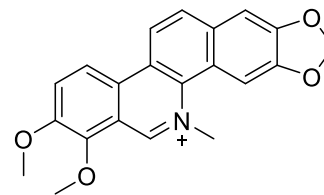

Chelerythrine

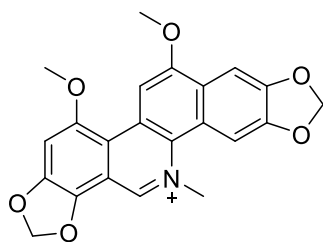

macarpine

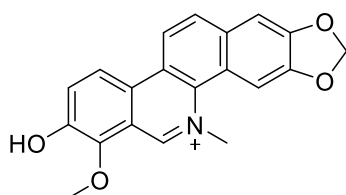

Fagaridine

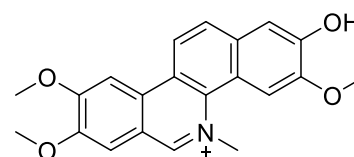

Fagaronine

**Figure S1.** The structures of natural benzo[c]phenanthridine alkaloids.

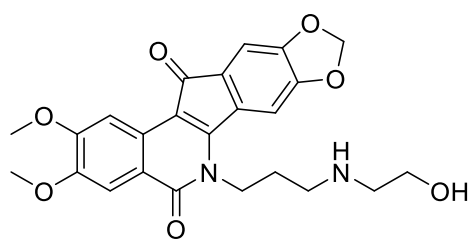

LMP744

**Figure S2.** The structure of LMP744.

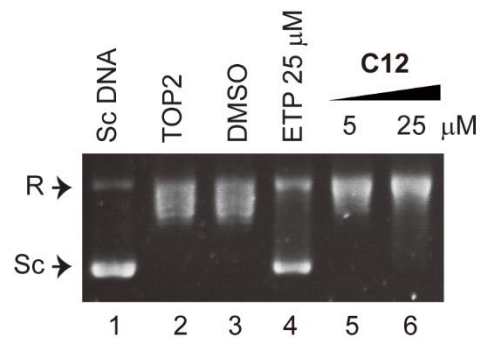

**Figure S3.** The TOP2 relaxing assay gel of **C12**. Lane 1, supercoiled pBR322 DNA alone; lane 2, DNA and TOP2; lane 2, DNA, TOP2 and DMSO; lanes 4, DNA, TOP2 and the positive control etoposide (ETP) at 25  $\mu\text{M}$  concentration; lanes 5-6, DNA, TOP2 and **C12** at 5 and 25  $\mu\text{M}$  concentration, respectively. R, relaxed DNA; Sc, supercoiled DNA.

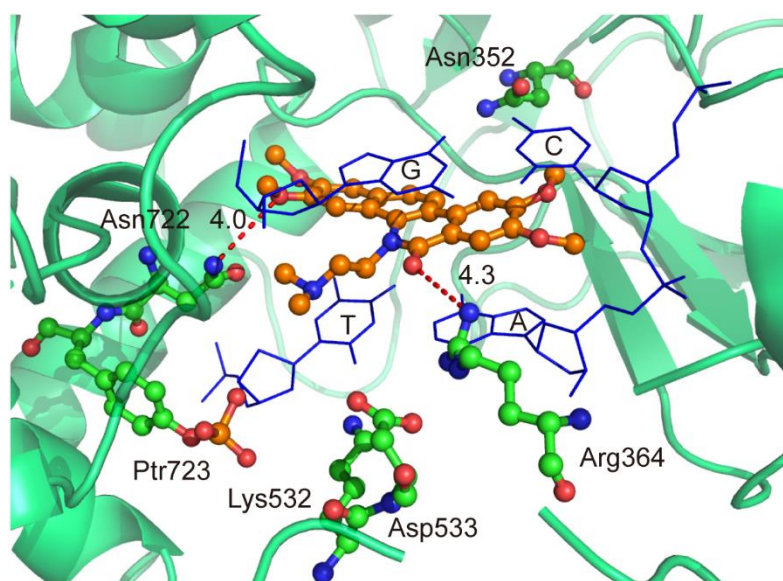

**Figure S4.** Hypothetical binding mode of C26 with TOP1cc (PDB: 1K4T).

<Chromatogram>

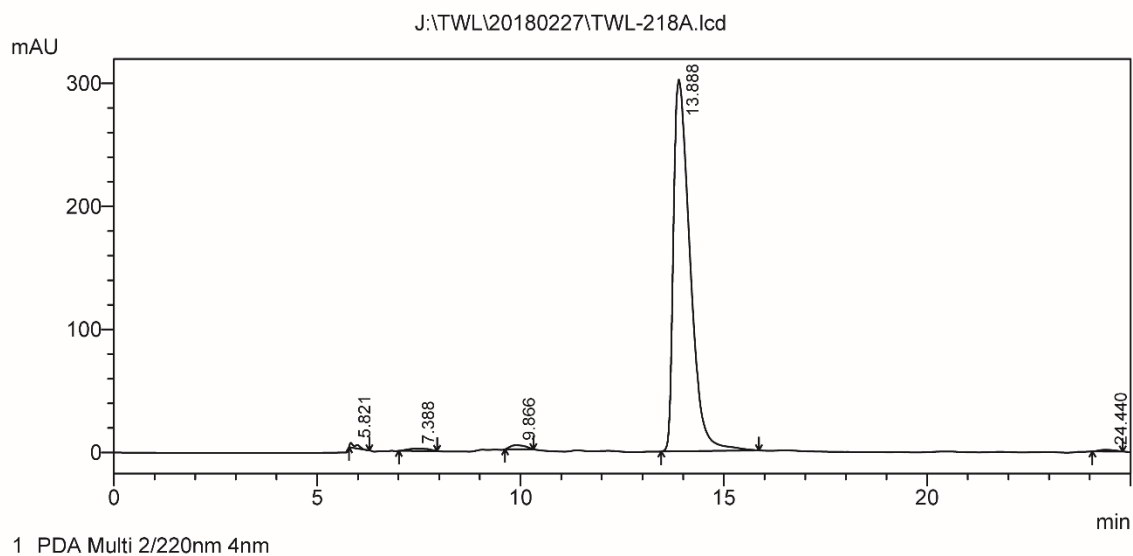

PeakTable

PDA Ch2 220nm 4nm

| Peak# | Ret. Time | Area    | Height | Area %  | Height % |
|-------|-----------|---------|--------|---------|----------|
| 1     | 5.821     | 43635   | 3784   | 0.495   | 1.212    |
| 2     | 7.388     | 67339   | 1825   | 0.764   | 0.585    |
| 3     | 9.866     | 86747   | 3305   | 0.984   | 1.059    |
| 4     | 13.888    | 8579055 | 301854 | 97.358  | 96.701   |
| 5     | 24.440    | 35094   | 1382   | 0.398   | 0.443    |
| Total |           | 8811871 | 312151 | 100.000 | 100.000  |

**Figure S5.** The HPLC profile of compound **C12**.

### Characterization Data of the Intermediates.

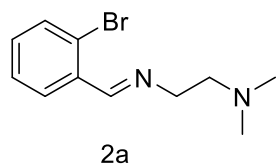

**N-(2-N,N-Dimethylethyl)-2-bromobenzaldimine (2a).** Light yellow liquid, yield 100%.  $^1\text{H}$  NMR (400 MHz,  $\text{CDCl}_3$ )  $\delta$  8.59 (s, 1H), 7.93 (dd,  $J = 7.6, 1.6$  Hz, 1H), 7.47 (dd,  $J = 8.0, 1.2$  Hz, 1H), 7.25–7.20 (m, 1H), 7.19–7.13 (m, 1H), 3.71 (t,  $J = 6.8$  Hz, 2H), 2.58 (t,  $J = 6.8$  Hz, 2H), 2.24 (s, 6H).

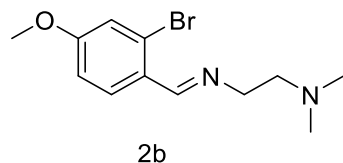

**N-(2-N,N-Dimethylethyl)-2-bromo-4-methoxybenzaldimine (2b).** Yellow liquid, yield 100%.  $^1\text{H}$  NMR (400 MHz,  $\text{CDCl}_3$ )  $\delta$  7.58 (s, 1H),  $\delta$  7.96 (d,  $J = 8.8$  Hz, 1H), 7.08 (d,  $J = 2.8$  Hz, 1H), 6.86 (dd,  $J = 8.8, 2.8$  Hz, 1H), 3.82 (s, 3H), 3.75 (t,  $J = 6.8$  Hz, 2H), 2.64 (t,  $J = 6.8$  Hz, 2H), 2.32 (s, 6H).

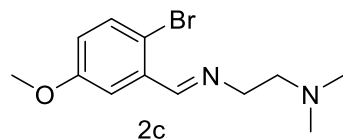

**N-(2-N,N-Dimethylethyl)-2-bromo-5-methoxybenzaldimine (2c).** Light yellow liquid, yield 100%.  $^1\text{H}$  NMR (400 MHz,  $\text{CDCl}_3$ )  $\delta$  8.63 (s, 1H), 7.54 (d,  $J = 3.2$  Hz, 1H), 7.42 (d,  $J = 8.8$  Hz, 1H), 6.84 (dd,  $J = 8.8, 3.2$  Hz, 1H), 3.83 (s, 3H), 3.80 (t,  $J = 6.8$  Hz, 2H), 2.65 (t,  $J = 6.8$  Hz, 2H), 2.32 (s, 6H).

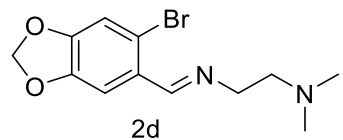

**(E)-2-(((6-Bromobenzo[*d*][1,3]dioxol-5-yl)methylene)amino)-N,N-dimethylethan-1-amine (2d).** Yellow liquid, yield 100%. The  $^1\text{H}$  NMR spectrum is similar to that reported.<sup>1</sup>

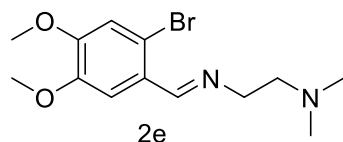



**N-(2-N,N-Dimethylethyl)-2-bromo-4,5-dimethoxybenzalimine (2e).** White solid, yield 100%.

The  $^1\text{H}$  NMR spectrum is similar to that reported.<sup>2</sup>

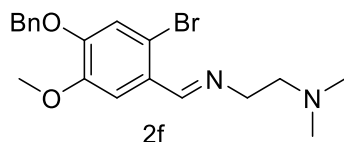

**N-(2-N,N-Dimethylethyl)-2-bromo-4-benzyloxy-5-methoxybenzalimine (2f).** White solid, yield 100%.  $^1\text{H}$  NMR (400 MHz,  $\text{CDCl}_3$ )  $\delta$  8.57 (s, 1H), 7.59 (s, 1H), 7.45 (d,  $J = 7.6$  Hz, 2H), 7.40 (dd,  $J = 7.6, 7.2$  Hz, 2H), 7.35 (d,  $J = 7.2$  Hz, 1H), 7.06 (s, 1H), 5.16 (s, 2H), 3.94 (s, 3H), 3.78 (t,  $J = 6.8$  Hz, 2H), 2.67 (t,  $J = 6.8$  Hz, 2H), 2.34 (s, 6H).

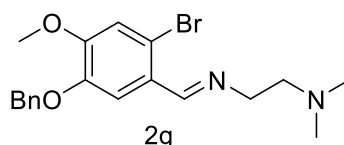

**N-(2-N,N-Dimethylethyl)-2-bromo-4-methoxy-5-benzyloxybenzalimine (2g).** White solid, yield 100%.  $^1\text{H}$  NMR (400 MHz,  $\text{CDCl}_3$ )  $\delta$  8.55 (s, 1H), 7.66 (s, 1H), 7.47 (d,  $J = 7.4$  Hz, 2H), 7.38 (dd,  $J = 7.4, 6.8$  Hz, 2H), 7.32 (d,  $J = 6.8$  Hz, 1H), 7.03 (s, 1H), 5.16 (s, 2H), 3.90 (s, 3H), 3.77 (t,  $J = 6.8$  Hz, 2H), 2.66 (t,  $J = 6.8$  Hz, 2H), 2.33 (s, 6H).

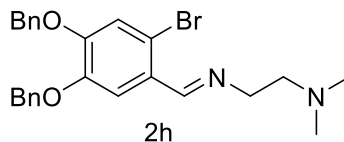

**N-(2-N,N-Dimethylethyl)-2-bromo-4,5-dibenzyloxybenzalimine (2h).** White solid, yield 100%.  $^1\text{H}$  NMR (400 MHz,  $\text{CDCl}_3$ )  $\delta$  8.53 (s, 1H), 7.67 (s, 1H), 7.46–7.41 (m, 4H), 7.39–7.34 (m, 4H), 7.34–7.29 (m, 2H), 7.08 (s, 1H), 5.16 (s, 2H), 5.14 (s, 2H), 3.69 (t,  $J = 6.8$  Hz, 2H), 2.61 (t,  $J = 6.8$  Hz, 2H), 2.30 (s, 6H).

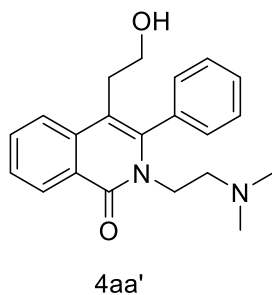

**2-(2-(Dimethylamino)ethyl)-4-(2-hydroxyethyl)-3-phenylisoquinolin-1(2H)-one (4aa').**

Yellow solid, yield 70%.  $^1\text{H}$  NMR (400 MHz,  $\text{CDCl}_3$ )  $\delta$  8.49 (dd,  $J = 8.0, 0.8$  Hz, 1H), 7.79–7.74

(m, 1H), 7.72–7.66 (m, 1H), 7.53–7.43 (m, 4H), 7.33–7.31 (m, 2H), 4.80 (s, 1H), 3.92–3.79 (m, 2H), 3.64 (t,  $J = 7.2$  Hz, 2H), 2.67 (t,  $J = 7.2$  Hz, 2H), 2.46–2.44 (m, 2H), 2.00 (s, 6H).

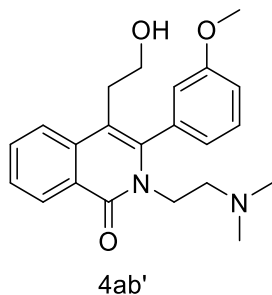

**2-(2-(Dimethylamino)ethyl)-4-(2-hydroxyethyl)-3-(3-methoxyphenyl)isoquinolin-1(2H)-one (4ab')**. Yellow solid, yield 61%.  $^1\text{H}$  NMR (400 MHz,  $\text{CDCl}_3$ )  $\delta$  8.46 (dd,  $J = 8.0, 0.8$  Hz, 1H), 7.75 (d,  $J = 8.0$  Hz, 1H), 7.68–7.62 (m, 1H), 7.49–7.44 (m, 1H), 7.39–7.34 (m, 1H), 6.98–6.94 (m, 1H), 6.89–6.83 (m, 2H), 3.87–3.82 (m, 2H), 3.79 (s, 3H), 3.63 (t,  $J = 7.2$  Hz, 2H), 2.68 (t,  $J = 7.2$  Hz, 2H), 2.48–2.41 (m, 2H), 2.02 (s, 6H).

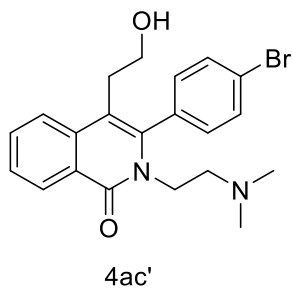

**3-(4-Bromophenyl)-2-(2-(dimethylamino)ethyl)-4-(2-hydroxyethyl)isoquinolin-1(2H)-one (4ac')**. White solid, yield 64%.  $^1\text{H}$  NMR (400 MHz,  $\text{CDCl}_3$ )  $\delta$  8.50 (d,  $J = 8.0$  Hz, 1H), 7.77 (d,  $J = 8.0$  Hz, 1H), 7.71 (dd,  $J = 8.0, 7.6$  Hz, 1H), 7.66 (d,  $J = 8.0$  Hz, 1H), 7.53 (dd,  $J = 8.0, 7.6$  Hz, 1H), 7.29–7.22 (m, 3H), 3.89–3.79 (m, 2H), 3.67 (t,  $J = 7.2$  Hz, 2H), 2.68 (t,  $J = 7.2$  Hz, 2H), 2.57–2.54 (m, 2H), 2.07 (s, 6H).

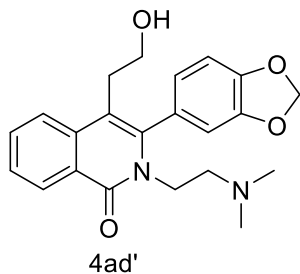

**3-(Benzo[d][1,3]dioxol-5-yl)-2-(2-(dimethylamino)ethyl)-4-(2-hydroxyethyl)isoquinolin-1(2H)-one (4ad')**. Yellow solid, yield 90%.  $^1\text{H}$  NMR (400 MHz,  $\text{CDCl}_3$ )  $\delta$  8.49 (dd,  $J = 8.0, 1.2$

Hz, 1H), 7.77 (d,  $J = 8.0$  Hz, 1H), 7.73–7.67 (m, 1H), 7.54–7.48 (m, 1H), 6.96–6.89 (m, 1H), 6.80–6.76 (m, 2H), 6.06 (s, 2H), 4.06–3.88 (m, 2H), 3.69 (t,  $J = 7.2$  Hz, 2H), 2.78 (t,  $J = 7.2$  Hz, 2H), 2.64–2.49 (m, 2H), 2.21 (s, 6H).

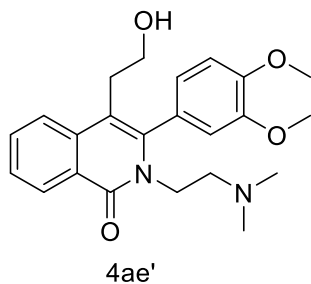

**3-(3,4-Dimethoxyphenyl)-2-(2-(dimethylamino)ethyl)-4-(2-hydroxyethyl)isoquinolin-1(2H)-one (4ae').** White solid, yield 24%.  $^1\text{H NMR}$  (400 MHz,  $\text{CDCl}_3$ )  $\delta$  8.44 (d,  $J = 8.0$  Hz, 1H), 7.70 (d,  $J = 8.0$  Hz, 1H), 7.63 (dd,  $J = 8.0, 7.6$  Hz, 1H), 7.44 (dd,  $J = 8.0, 7.6$  Hz, 1H), 6.91 (d,  $J = 8.0$  Hz, 1H), 6.82 (dd,  $J = 8.0, 1.6$  Hz, 1H), 6.76 (d,  $J = 1.6$  Hz, 1H), 3.98–3.84 (m, 2H), 3.82 (s, 3H), 3.75 (s, 3H), 3.64 (t,  $J = 7.2$  Hz, 2H), 2.67 (t,  $J = 7.2$  Hz, 2H), 2.48–2.45 (m, 2H), 2.02 (s, 6H).

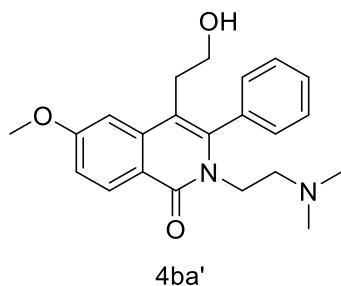

**2-(2-(Dimethylamino)ethyl)-4-(2-hydroxyethyl)-6-methoxy-3-phenylisoquinolin-1(2H)-one (4ba').** Yellow solid, yield 60%.  $^1\text{H NMR}$  (400 MHz,  $\text{CDCl}_3$ )  $\delta$  8.44 (d,  $J = 8.8$  Hz, 1H), 7.56–7.45 (m, 3H), 7.34–7.31 (m, 2H), 7.12 (d,  $J = 2.4$  Hz, 1H), 7.11 (dd,  $J = 8.8, 2.4$  Hz, 1H), 3.93 (s, 3H), 3.88–3.81 (m, 2H), 3.67 (t,  $J = 7.2$  Hz, 2H), 2.65 (t,  $J = 7.2$  Hz, 2H), 2.46–2.41 (m, 2H), 2.03 (s, 6H).

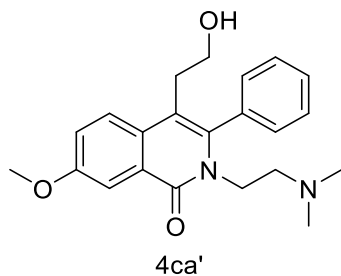

**2-(2-(Dimethylamino)ethyl)-4-(2-hydroxyethyl)-7-methoxy-3-phenylisoquinolin-1(2H)-one (4ca')**. White solid, yield 78%. <sup>1</sup>H NMR (400 MHz, CDCl<sub>3</sub>) δ 7.86 (d, *J* = 2.8 Hz, 1H), 7.63 (d, *J* = 8.8 Hz, 1H), 7.43–7.40 (m, 3H), 7.27–7.22 (m, 3H), 3.87 (s, 3H), 3.84–3.80 (m, 2H), 3.58 (t, *J* = 7.2 Hz, 2H), 2.61 (t, *J* = 7.2 Hz, 2H), 2.41–2.37 (m, 2H), 1.98 (s, 6H).

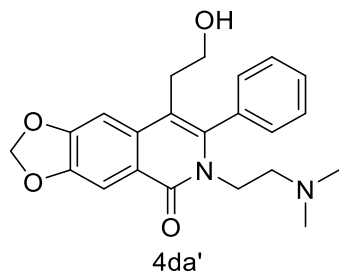

**6-(2-(Dimethylamino)ethyl)-8-(2-hydroxyethyl)-7-phenyl-[1,3]dioxolo[4,5-g]isoquinolin-5(6H)-one (4da')**. White solid, yield 57%. <sup>1</sup>H NMR (400 MHz, CDCl<sub>3</sub>) δ 7.87 (s, 1H), 7.52–7.47 (m, 3H), 7.39–7.31 (m, 2H), 7.15 (s, 1H), 6.10 (s, 2H), 3.87–3.82 (m, 2H), 3.65 (t, *J* = 7.6 Hz, 2H), 2.62 (t, *J* = 7.6 Hz, 2H), 2.47–2.43 (m, 2H), 2.04 (s, 6H).

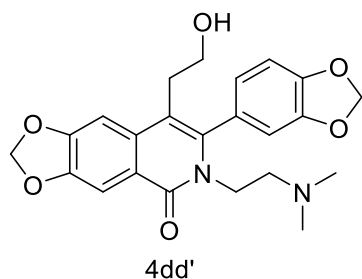

**7-(Benzo[d][1,3]dioxol-5-yl)-6-(2-(dimethylamino)ethyl)-8-(2-hydroxyethyl)-[1,3]dioxolo[4,5-g]isoquinolin-5(6H)-one (4dd')**. Yellow solid, yield 57%. <sup>1</sup>H NMR (400 MHz, CDCl<sub>3</sub>) δ 7.75 (s, 1H), 7.07 (s, 1H), 6.84 (d, *J* = 8.4 Hz, 1H), 6.73–6.65 (m, 2H), 6.01 (s, 2H), 5.98 (s, 2H), 3.96–3.73 (m, 2H), 3.57 (t, *J* = 7.6 Hz, 2H), 2.56 (t, *J* = 7.6 Hz, 2H), 2.42–2.38 (m, 2H), 2.03 (s, 6H).

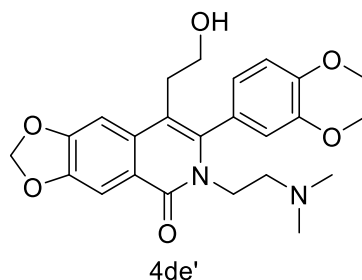

**7-(3,4-Dimethoxyphenyl)-6-(2-(dimethylamino)ethyl)-8-(2-hydroxyethyl)-[1,3]dioxolo[4,5-g]isoquinolin-5(6H)-one (4de')**. Yellow solid, yield 90%. <sup>1</sup>H NMR (400 MHz, CDCl<sub>3</sub>) δ 7.78 (s,

1H), 7.05 (s, 1H), 6.90 (d,  $J = 8.0$  Hz, 1H), 6.80 (d,  $J = 8.0$  Hz, 1H), 6.75 (s, 1H), 6.02 (s, 2H), 3.87 (s, 3H), 3.82 (s, 3H), 3.79–3.70 (m, 2H), 3.60 (t,  $J = 7.2$  Hz, 2H), 2.59 (t,  $J = 7.2$  Hz, 2H), 2.44–2.40 (m, 2H), 2.03 (s, 6H).

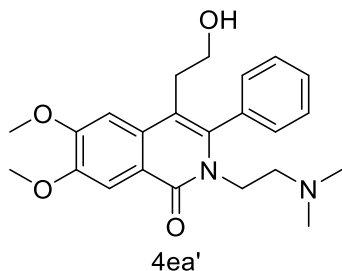

**2-(2-(Dimethylamino)ethyl)-4-(2-hydroxyethyl)-6,7-dimethoxy-3-phenylisoquinolin-1(2H)-one (4ea')**. White solid, yield 23%.  $^1\text{H}$  NMR (400 MHz,  $\text{CDCl}_3$ )  $\delta$  7.84 (s, 1H), 7.48–7.42 (m, 3H), 7.32–7.26 (m, 2H), 7.05 (s, 1H), 3.99 (s, 3H), 3.96 (s, 3H), 3.85–3.79 (m, 2H), 3.61 (t,  $J = 7.2$  Hz, 2H), 2.60 (t,  $J = 7.2$  Hz, 2H), 2.47–2.43 (m, 2H), 1.99 (s, 6H).

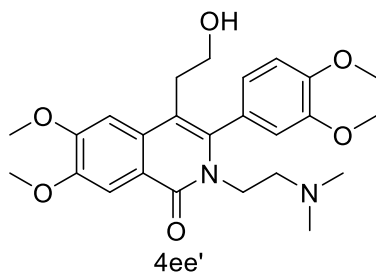

**3-(3,4-Dimethoxyphenyl)-2-(2-(dimethylamino)ethyl)-4-(2-hydroxyethyl)-6,7-dimethoxyisoquinolin-1(2H)-one (4ee')**. Yellow solid, yield 84%.  $^1\text{H}$  NMR (400 MHz,  $\text{CDCl}_3$ )  $\delta$  7.83 (s, 1H), 7.04 (s, 1H), 6.90 (d,  $J = 8.0$  Hz, 1H), 6.81 (d,  $J = 8.0, 2.0$  Hz, 1H), 6.76 (d,  $J = 2.0$  Hz, 1H), 3.95 (s, 3H), 3.94 (s, 3H), 3.92–3.85 (m, 5H), 3.82 (s, 3H), 3.64 (t,  $J = 7.2$  Hz, 2H), 2.63 (t,  $J = 7.2$  Hz, 2H), 2.50–2.46 (m, 2H), 2.03 (s, 6H).

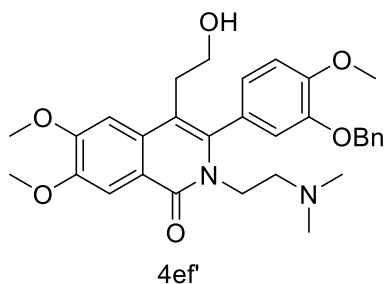

**3-(3-(Benzyloxy)-4-methoxyphenyl)-2-(2-(dimethylamino)ethyl)-4-(2-hydroxyethyl)-6,7-dimethoxyisoquinolin-1(2H)-one (4ef')**. Yellow solid, yield 65%.  $^1\text{H}$  NMR (400 MHz,  $\text{CDCl}_3$ )  $\delta$  7.81 (s, 1H), 7.35 (d,  $J = 7.2$  Hz, 2H), 7.31–7.28 (m, 2H), 7.24 (d,  $J = 7.2$  Hz, 1H), 7.00 (s, 1H),

6.91 (d,  $J = 8.0$  Hz, 1H), 6.79 (dd,  $J = 8.0, 1.2$  Hz, 1H), 6.72 (d,  $J = 1.2$  Hz, 1H), 5.14 (s, 2H), 3.93 (s, 3H), 3.92 (s, 3H), 3.89 (s, 3H), 3.86–3.80 (m, 2H), 3.68 (t,  $J = 7.2$  Hz, 2H), 2.55 (t,  $J = 7.2$  Hz, 2H), 2.42–2.38 (m, 2H), 2.00 (s, 6H).

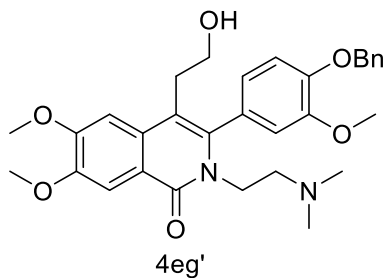

**3-(4-(Benzyloxy)-3-methoxyphenyl)-2-(2-(dimethylamino)ethyl)-4-(2-hydroxyethyl)-6,7-dimethoxyisoquinolin-1(2H)-one (4eg')**. White solid, yield 60%.  $^1\text{H}$  NMR (400 MHz,  $\text{CDCl}_3$ )  $\delta$  7.84 (s, 1H), 7.43 (d,  $J = 7.2$  Hz, 2H), 7.38–7.34 (m, 2H), 7.30 (d,  $J = 7.2$  Hz, 1H), 7.10 (s, 1H), 6.96 (d,  $J = 8.0$  Hz, 1H), 6.83–6.70 (m, 2H), 5.17 (s, 2H), 4.02 (s, 3H), 3.94 (s, 3H), 3.91–3.86 (m, 5H), 3.65 (t,  $J = 7.2$  Hz, 2H), 2.66 (t,  $J = 7.2$  Hz, 2H), 2.51–2.37 (m, 2H), 2.01 (s, 6H).

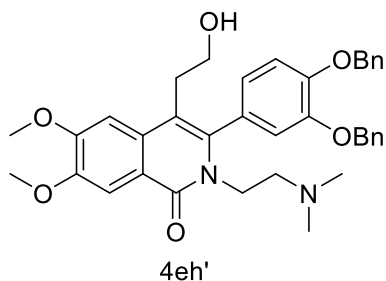

**3-(3,4-Bis(benzyloxy)phenyl)-2-(2-(dimethylamino)ethyl)-4-(2-hydroxyethyl)-6,7-dimethoxyisoquinolin-1(2H)-one (4eh')**. Yellow liquid, yield 65%.  $^1\text{H}$  NMR (400 MHz,  $\text{CDCl}_3$ )  $\delta$  7.81 (s, 1H), 7.45–7.39 (m, 2H), 7.38–7.32 (m, 4H), 7.31–7.22 (m, 4H), 7.00 (s, 1H), 6.95 (d,  $J = 8.0$  Hz, 1H), 6.79–6.69 (m, 2H), 5.17 (s, 2H), 5.14 (s, 2H), 3.94 (s, 3H), 3.92 (s, 3H), 3.88–3.79 (m, 2H), 3.65 (t,  $J = 7.2$  Hz, 2H), 2.53 (t,  $J = 7.2$  Hz, 2H), 2.40–2.36 (m, 2H), 1.95 (s, 6H).

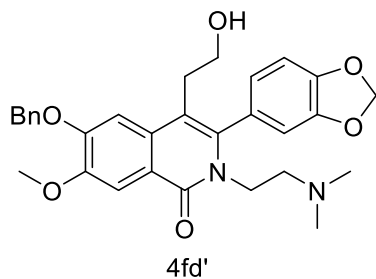

**3-(Benzo[d][1,3]dioxol-5-yl)-6-(benzyloxy)-2-(2-(dimethylamino)ethyl)-4-(2-hydroxyethyl)-7-methoxyisoquinolin-1(2H)-one (4fd')**. Yellow solid, yield 70%.  $^1\text{H}$  NMR (400 MHz,  $\text{CDCl}_3$ )

$\delta$  7.91 (s, 1H), 7.43 (d,  $J = 7.2$  Hz, 2H), 7.40–7.36 (m, 2H), 7.25 (d,  $J = 7.2$  Hz, 1H), 7.05 (s, 1H), 6.84 (d,  $J = 8.0$  Hz, 1H), 6.72–6.70 (m, 2H), 5.99 (s, 2H), 5.21 (s, 2H), 3.92 (s, 3H), 3.85–3.73 (m, 2H), 3.63 (t,  $J = 7.2$  Hz, 2H), 2.65 (t,  $J = 7.2$  Hz, 2H), 2.49–2.35 (m, 2H), 2.07 (s, 6H).

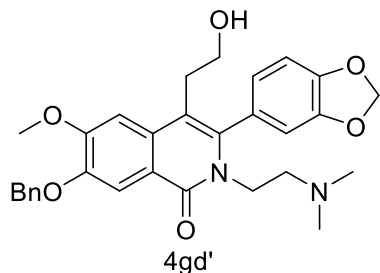

**3-(Benzo[d][1,3]dioxol-5-yl)-7-(benzyloxy)-2-(2-(dimethylamino)ethyl)-4-(2-hydroxyethyl)-6-methoxyisoquinolin-1(2H)-one (4gd')**. Yellow solid, yield 65%.  $^1\text{H}$  NMR (400 MHz,  $\text{CDCl}_3$ )  $\delta$  7.82 (s, 1H), 7.39 (d,  $J = 7.2$  Hz, 2H), 7.32–7.28 (m, 2H), 7.24 (d,  $J = 7.2$  Hz, 1H), 7.00 (s, 1H), 6.81 (d,  $J = 8.0$  Hz, 1H), 6.67–6.65 (m, 2H), 5.97 (s, 2H), 5.24 (s, 2H), 3.95 (s, 3H), 3.93–3.84 (m, 2H), 3.68 (t,  $J = 7.2$  Hz, 2H), 2.53 (t,  $J = 7.2$  Hz, 2H), 2.44–2.36 (m, 2H), 2.05 (s, 6H).

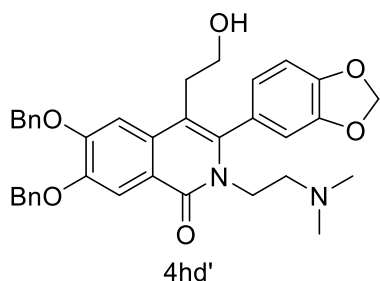

**3-(Benzo[d][1,3]dioxol-5-yl)-6,7-bis(benzyloxy)-2-(2-(dimethylamino)ethyl)-4-(2-hydroxyethyl)isoquinolin-1(2H)-one (4hd')**. Yellow gel, yield 65%.  $^1\text{H}$  NMR (400 MHz,  $\text{CDCl}_3$ )  $\delta$  7.99 (s, 1H), 7.52 (d,  $J = 7.2$  Hz, 2H), 7.47 (d,  $J = 7.2$  Hz, 2H), 7.42–7.36 (m, 4H), 7.34–7.30 (m, 2H), 7.10 (s, 1H), 6.98 (d,  $J = 8.0$  Hz, 1H), 6.74–6.68 (m, 2H), 6.08 (s, 2H), 5.31 (s, 2H), 5.30 (s, 2H), 4.06–3.87 (m, 2H), 3.79 (t,  $J = 7.2$  Hz, 2H), 2.61 (t,  $J = 7.2$  Hz, 2H), 2.53–2.38 (m, 2H), 2.11 (s, 6H).

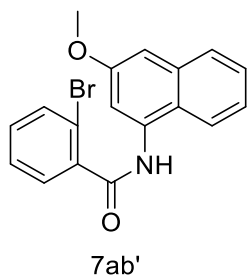

**2-Bromo-N-(3-methoxynaphthalen-1-yl)benzamide (7ab')**. White solid, yield 85%.  $^1\text{H}$  NMR (400 MHz,  $\text{CDCl}_3$ )  $\delta$  8.00–7.94 (m, 2H), 7.89–7.82 (m, 2H), 7.78 (d,  $J = 8.4$  Hz, 1H), 7.66–7.61 (m, 1H), 7.50–7.44 (m, 2H), 7.41–7.37 (m, 1H), 7.21–7.17 (m, 1H), 7.07 (s, 1H), 3.95 (s, 3H).

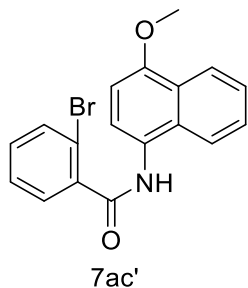

**2-Bromo-N-(4-methoxynaphthalen-1-yl)benzamide (7ac')**. White solid, yield 60%.  $^1\text{H}$  NMR (400 MHz,  $\text{CDCl}_3$ )  $\delta$  8.33 (d,  $J = 8.4$  Hz, 1H), 7.97 (d,  $J = 8.4$  Hz, 1H), 7.91 (d,  $J = 8.4$  Hz, 1H), 7.66 (d,  $J = 9.2$  Hz, 1H), 7.58–7.46 (m, 4H), 7.23–7.17 (m, 2H), 6.88 (d,  $J = 8.4$  Hz, 1H), 4.04 (s, 3H).

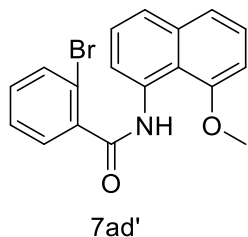

**2-Bromo-N-(8-methoxynaphthalen-1-yl)benzamide (7ad')**. White solid, yield 85%.  $^1\text{H}$  NMR (400 MHz,  $\text{CDCl}_3$ )  $\delta$  11.11 (s, 1H), 8.89 (d,  $J = 7.6$  Hz, 1H), 7.70–7.66 (m, 2H), 7.58 (dd,  $J = 8.0, 0.8$  Hz, 1H), 7.52 (d,  $J = 8.0$  Hz, 1H), 7.49–7.41 (m, 2H), 7.38–7.31 (m, 2H), 6.86 (d,  $J = 7.6$  Hz, 1H), 3.92 (s, 3H).

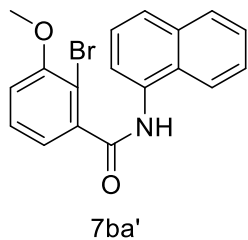

**2-Bromo-3-methoxy-N-(naphthalen-1-yl)benzamide (7ba')**. Pale yellow solid, yield 81%.  $^1\text{H}$  NMR (400 MHz,  $\text{CDCl}_3$ )  $\delta$  8.03 (d,  $J = 7.6$  Hz, 1H), 7.93 (dd,  $J = 6.8, 2.0$  Hz, 1H), 7.83 (dd,  $J = 6.8, 2.0$  Hz, 1H), 7.70 (d,  $J = 8.0$  Hz, 1H), 7.51–7.43 (m, 3H), 7.36 (dd,  $J = 8.0, 7.6$  Hz, 1H), 7.24 (d,  $J = 7.6$  Hz, 1H), 6.97 (d,  $J = 8.0$  Hz, 1H), 3.90 (s, 3H).



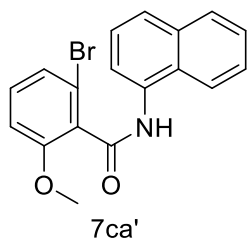

**2-Bromo-6-methoxy-N-(naphthalen-1-yl)benzamide (7ca')**. White solid, yield 85%. The  $^1\text{H}$  NMR spectrum is similar to that reported.<sup>3</sup>

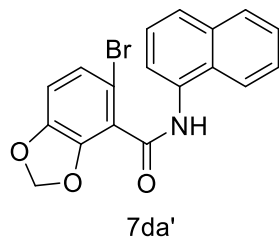

**5-Bromo-N-(naphthalen-1-yl)benzo[d][1,3]dioxole-4-carboxamide (7da')**. White solid, yield 84%.  $^1\text{H}$  NMR (400 MHz,  $\text{CDCl}_3$ )  $\delta$  8.14 (d,  $J = 7.2$  Hz, 1H), 8.07 (s, 1H), 8.01 (d,  $J = 7.2$  Hz, 1H), 7.89 (dd,  $J = 7.2, 1.2$  Hz, 1H), 7.75 (d,  $J = 8.4$  Hz, 1H), 7.58–7.48 (m, 3H), 7.17 (d,  $J = 8.4$  Hz, 1H), 6.80 (d,  $J = 8.4$  Hz, 1H), 6.14 (s, 2H).

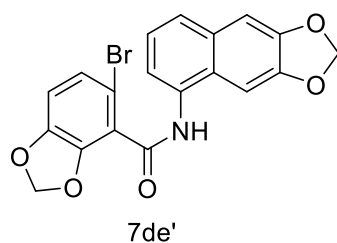

**5-Bromo-N-(naphtho[2,3-d][1,3]dioxol-5-yl)benzo[d][1,3]dioxole-4-carboxamide (7de')**. White solid, yield 90%. The  $^1\text{H}$  NMR spectrum is similar to that reported.<sup>4</sup>

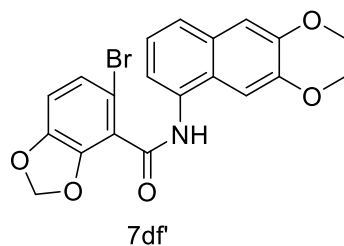

**5-Bromo-N-(6,7-dimethoxynaphthalen-1-yl)benzo[d][1,3]dioxole-4-carboxamide (7df')**. White solid, yield 90%.  $^1\text{H}$  NMR (400 MHz,  $\text{CDCl}_3$ )  $\delta$  7.86 (s, 1H), 7.69 (d,  $J = 7.2$  Hz, 1H), 7.63 (d,  $J = 8.0$  Hz, 1H), 7.37 (dd,  $J = 8.4, 8.0$  Hz, 1H), 7.34 (s, 1H), 7.17–7.12 (m, 2H), 6.78 (d,  $J = 8.4$  Hz, 1H), 6.11 (s, 2H), 4.01 (s, 3H), 3.98 (s, 3H).

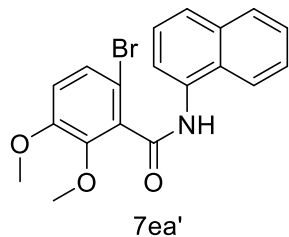

**6-Bromo-2,3-dimethoxy-N-(naphthalen-1-yl)benzamide (7ea')**. White solid, yield 80%.  $^1\text{H}$  NMR (400 MHz,  $\text{CDCl}_3$ )  $\delta$  8.04–8.00 (m, 1H), 7.97 (d,  $J = 7.6$  Hz, 1H), 7.85–7.79 (m, 1H), 7.74–7.68 (m, 2H), 7.52–7.40 (m, 3H), 7.28 (d,  $J = 8.8$  Hz, 1H), 6.82 (d,  $J = 8.8$  Hz, 1H), 3.88 (s, 3H), 3.85 (s, 3H).

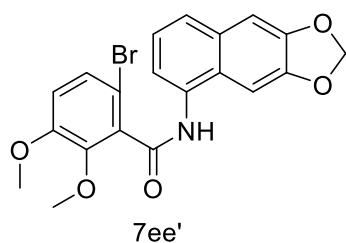

**6-Bromo-2,3-dimethoxy-N-(naphtho[2,3-d][1,3]dioxol-5-yl)benzamide (7ee')**. White solid, yield 90%. The  $^1\text{H}$  NMR spectrum is similar to that reported.<sup>4</sup>

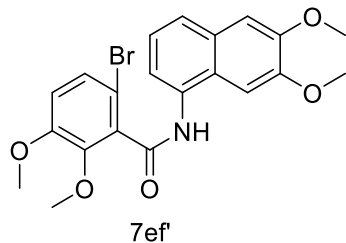

**6-Bromo-N-(6,7-dimethoxynaphthalen-1-yl)-2,3-dimethoxybenzamide (7ef')**. White solid, yield 81%.  $^1\text{H}$  NMR (400 MHz,  $\text{CDCl}_3$ )  $\delta$  7.70–7.59 (m, 2H), 7.54 (s, 1H), 7.48 (s, 1H), 7.42–7.38 (m, 1H), 7.40–7.35 (d,  $J = 8.8$  Hz, 1H), 7.19 (s, 1H), 6.92 (d,  $J = 8.8$  Hz, 1H), 4.05 (s, 3H), 4.03 (s, 3H), 3.99 (s, 3H), 3.94 (s, 3H).

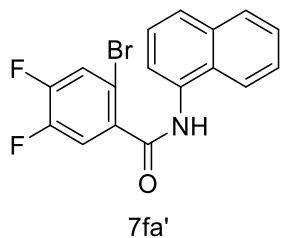

**2-Bromo-4,5-difluoro-N-(naphthalen-1-yl)benzamide (7fa')**. White solid, yield 65%. The  $^1\text{H}$  NMR spectrum is similar to that reported.<sup>3</sup>

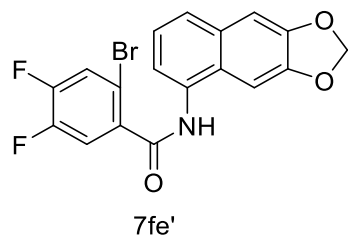

**2-Bromo-4,5-difluoro-N-(naphtho[2,3-d][1,3]dioxol-5-yl)benzamide (7fe')**. White solid, yield 77%.  $^1\text{H}$  NMR (400 MHz,  $\text{CDCl}_3$ )  $\delta$  7.88 (s, 1H), 7.75–7.66 (m, 2H), 7.62 (d,  $J = 8.4$  Hz, 1H), 7.56–7.51 (m, 1H), 7.40–7.35 (m, 2H), 7.17 (s, 1H), 6.06 (s, 2H).

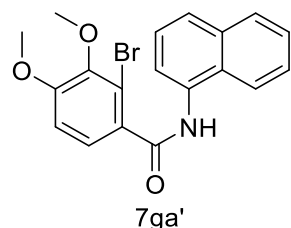

**2-Bromo-3,4-dimethoxy-N-(naphthalen-1-yl)benzamide (7ga')**. White solid, yield 85%.  $^1\text{H}$  NMR (400 MHz,  $\text{CDCl}_3$ )  $\delta$  8.24–8.10 (m, 2H), 8.01 (d,  $J = 7.2$  Hz, 1H), 7.90 (dd,  $J = 7.2, 2.4$  Hz, 1H), 7.75 (d,  $J = 8.0$  Hz, 1H), 7.60 (d,  $J = 8.4$  Hz, 1H), 7.58–7.50 (m, 3H), 7.00 (d,  $J = 8.4$  Hz, 1H), 3.95 (s, 3H), 3.92 (s, 3H).

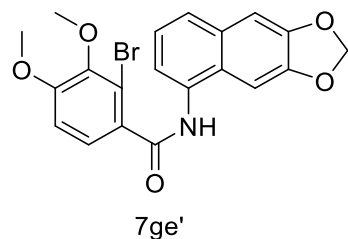

**2-Bromo-3,4-dimethoxy-N-(naphtho[2,3-d][1,3]dioxol-5-yl)benzamide (7ge')**. White solid, yield 85%.  $^1\text{H}$  NMR (400 MHz,  $\text{CDCl}_3$ )  $\delta$  7.92 (s, 1H), 7.79 (d,  $J = 7.6$  Hz, 1H), 7.65–7.56 (m, 2H), 7.39–7.35 (m, 1H), 7.32 (s, 1H), 7.16 (s, 1H), 6.99 (d,  $J = 8.4$  Hz, 1H), 6.06 (s, 2H), 3.95 (s, 3H), 3.91 (s, 3H).

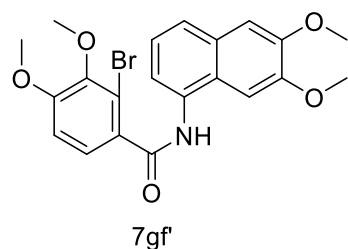

**2-Bromo-N-(6,7-dimethoxynaphthalen-1-yl)-3,4-dimethoxybenzamide (7gf').** White solid, yield 90%.  $^1\text{H}$  NMR (400 MHz,  $\text{CDCl}_3$ )  $\delta$  7.70–7.59 (m, 2H), 7.54 (s, 1H), 7.48 (s, 1H), 7.42 (d,  $J = 7.6$  Hz, 1H), 7.40–7.35 (m, 1H), 7.19 (s, 1H), 6.92 (d,  $J = 8.4$  Hz, 1H), 4.05 (s, 3H), 4.03 (s, 3H), 3.99 (s, 3H), 3.94 (s, 3H).

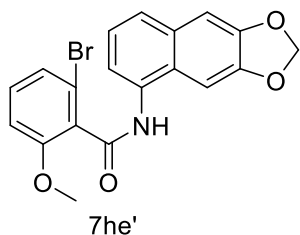

**2-Bromo-6-methoxy-N-(naphtho[2,3-d][1,3]dioxol-5-yl)benzamide (7he').** White solid, yield 93%.  $^1\text{H}$  NMR (400 MHz,  $\text{CDCl}_3$ )  $\delta$  7.72 (d,  $J = 8.0$  Hz, 1H), 7.61 (d,  $J = 8.0$  Hz, 1H), 7.47 (s, 1H), 7.44 (s, 1H), 7.40–7.36 (m, 1H), 7.29–7.27 (m, 1H), 7.27–7.26 (m, 1H), 7.16 (s, 1H), 6.99–6.95 (m, 1H), 6.06 (s, 2H), 3.96 (s, 3H).

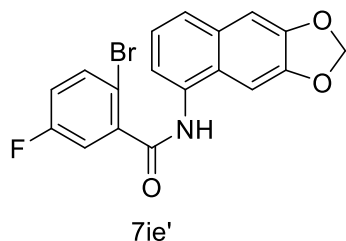

**2-Bromo-5-fluoro-N-(naphtho[2,3-d][1,3]dioxol-5-yl)benzamide (7ie').** White solid, yield 90%.  $^1\text{H}$  NMR (400 MHz,  $\text{CDCl}_3$ )  $\delta$  7.84 (s, 1H), 7.76 (d,  $J = 7.2$  Hz, 1H), 7.65–7.59 (m, 2H), 7.55–7.48 (m, 2H), 7.41–7.35 (m, 1H), 7.30 (s, 1H), 7.17 (s, 1H), 6.06 (s, 2H).

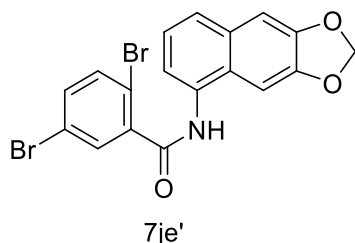

**2,5-Dibromo-N-(naphtho[2,3-d][1,3]dioxol-5-yl)benzamide (7je').** White solid, yield 83%.  $^1\text{H}$  NMR (400 MHz,  $\text{CDCl}_3$ )  $\delta$  7.91 (d,  $J = 2.4$  Hz, 1H), 7.78–7.72 (m, 2H), 7.62 (d,  $J = 8.8$  Hz, 1H), 7.57–7.54 (m, 1H), 7.49 (dd,  $J = 8.8, 2.4$  Hz, 1H), 7.41–7.36 (m, 1H), 7.30 (s, 1H), 7.17 (s, 1H), 6.07 (s, 2H).

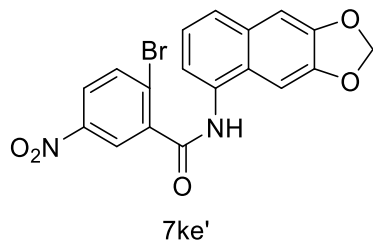

**2-Bromo-N-(naphtho[2,3-d][1,3]dioxol-5-yl)-5-nitrobenzamide (7ke')**. White solid, yield 32%.  $^1\text{H}$  NMR (400 MHz,  $\text{CDCl}_3$ )  $\delta$  8.60 (d,  $J = 2.4$  Hz, 1H), 8.21 (dd,  $J = 8.8, 2.4$  Hz, 1H), 7.90 (d,  $J = 8.8$  Hz, 1H), 7.81 (s, 1H), 7.75 (d,  $J = 7.2$  Hz, 1H), 7.64 (d,  $J = 8.4$  Hz, 1H), 7.42–7.37 (m, 1H), 7.28 (s, 1H), 7.18 (s, 1H), 6.07 (s, 2H).

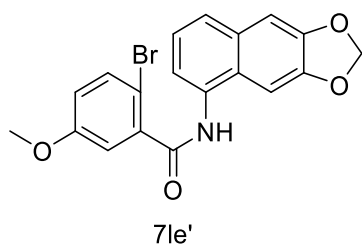

**2-Bromo-5-methoxy-N-(naphtho[2,3-d][1,3]dioxol-5-yl)benzamide (7le')**. White solid, yield 67%.  $^1\text{H}$  NMR (500 MHz,  $\text{CDCl}_3$ )  $\delta$  7.87 (s, 1H), 7.79 (d,  $J = 7.5$  Hz, 1H), 7.61 (d,  $J = 7.5$  Hz, 1H), 7.56 (d,  $J = 8.5$  Hz, 1H), 7.40–7.36 (m, 1H), 7.34 (s, 2H), 7.17 (s, 1H), 6.93 (d,  $J = 8.5$  Hz, 1H), 6.06 (s, 2H), 3.87 (s, 3H).

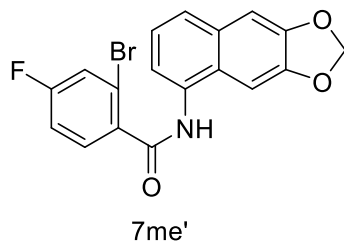

**2-Bromo-4-fluoro-N-(naphtho[2,3-d][1,3]dioxol-5-yl)benzamide (7me')**. White solid, yield 60%.  $^1\text{H}$  NMR (400 MHz,  $\text{CDCl}_3$ )  $\delta$  7.84 (s, 1H), 7.76 (d,  $J = 8.4$  Hz, 1H), 7.68–7.60 (m, 2H), 7.53 (dd,  $J = 8.4, 3.2$  Hz, 1H), 7.41–7.36 (m, 2H), 7.30 (s, 1H), 7.17 (s, 1H), 6.06 (s, 2H).

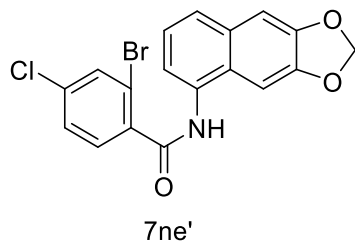

**2-Bromo-4-chloro-N-(naphtho[2,3-d][1,3]dioxol-5-yl)benzamide (7ne')**. Pale red solid, yield 89%. <sup>1</sup>H NMR (400 MHz, CDCl<sub>3</sub>) δ 7.81 (s, 1H), 7.77–7.71 (m, 2H), 7.61 (d, *J* = 8.4 Hz, 1H), 7.46 (d, *J* = 8.0 Hz, 1H), 7.40–7.35 (m, 2H), 7.29 (s, 1H), 7.17 (s, 1H), 6.06 (s, 2H).

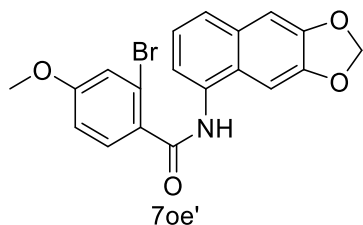

**2-Bromo-4-methoxy-N-(naphtho[2,3-d][1,3]dioxol-5-yl)benzamide (7oe')**. White solid, yield 84%. <sup>1</sup>H NMR (400 MHz, CDCl<sub>3</sub>) δ 7.96 (s, 1H), 7.86–7.75 (m, 2H), 7.59 (d, *J* = 7.6 Hz, 1H), 7.40–7.35 (m, 1H), 7.33 (s, 1H), 7.23–7.19 (m, 1H), 7.16 (s, 1H), 7.02–6.95 (m, 1H), 6.06 (s, 2H), 3.86 (s, 3H).

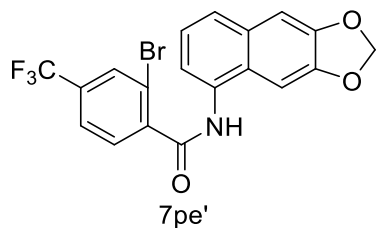

**2-Bromo-N-(naphtho[2,3-d][1,3]dioxol-5-yl)-4-(trifluoromethyl)benzamide (7pe')**. White solid, yield 48%. <sup>1</sup>H NMR (400 MHz, DMSO) δ 10.48 (s, 1H), 8.14 (d, *J* = 1.8 Hz, 1H), 8.01 (d, *J* = 8.4 Hz, 1H), 7.81 (dd, *J* = 8.4, 1.8 Hz, 1H), 7.68 (d, *J* = 8.0 Hz, 1H), 7.60 (d, *J* = 7.2 Hz, 1H), 7.52 (s, 1H), 7.40–7.35 (m, 2H), 6.15 (s, 2H).

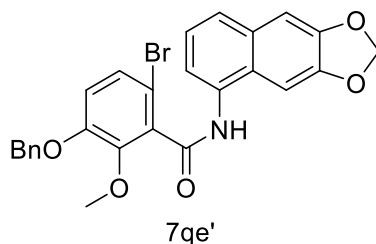

**3-(Benzyloxy)-6-bromo-2-methoxy-N-(naphtho[2,3-d][1,3]dioxol-5-yl)benzamide (7qe')**. White solid, yield 90%. <sup>1</sup>H NMR (400 MHz, CDCl<sub>3</sub>) δ 7.70 (d, *J* = 7.2 Hz, 1H), 7.64 (d, *J* = 8.4 Hz, 1H), 7.56–7.38 (m, 8H), 7.32 (d, *J* = 8.8 Hz, 1H), 7.18 (s, 1H), 6.95 (d, *J* = 8.8 Hz, 1H), 6.07 (s, 2H), 5.19 (s, 2H), 4.05 (s, 3H).

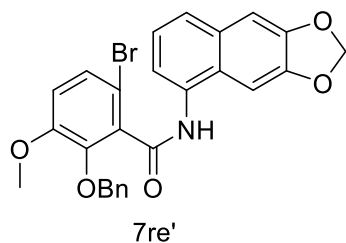

**2-(Benzyloxy)-6-bromo-3-methoxy-N-(naphtho[2,3-d][1,3]dioxol-5-yl)benzamide (7re').**

White solid, yield 85%. <sup>1</sup>H NMR (400 MHz, CDCl<sub>3</sub>) δ 7.60–7.56 (m, 2H), 7.46–7.43 (m, 2H), 7.39–7.30 (m, 5H), 7.26–7.24 (m, 2H), 7.13 (s, 1H), 6.91 (d, *J* = 8.8 Hz, 1H), 6.01 (s, 2H), 5.13 (s, 2H), 3.93 (s, 3H).

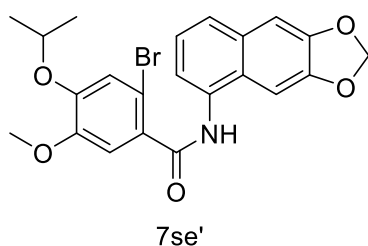

**2-Bromo-4-isopropoxy-5-methoxy-N-(naphtho[2,3-d][1,3]dioxol-5-yl)benzamide (7se').**

White solid, yield 60%. <sup>1</sup>H NMR (400 MHz, CDCl<sub>3</sub>) δ 8.14 (s, 1H), 7.79 (d, *J* = 7.2 Hz, 1H), 7.59 (d, *J* = 8.4 Hz, 1H), 7.44 (s, 1H), 7.39–7.33 (m, 2H), 7.16 (s, 1H), 7.12 (s, 1H), 6.04 (s, 2H), 4.65–4.59 (m, 1H), 3.92 (s, 3H), 1.42 (d, *J* = 6.0 Hz, 6H).

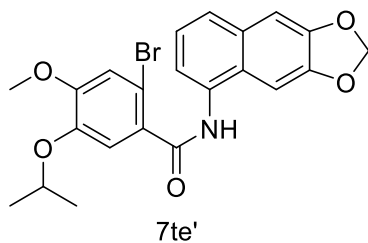

**2-Bromo-5-isopropoxy-4-methoxy-N-(naphtho[2,3-d][1,3]dioxol-5-yl)benzamide (7te').**

White solid, yield 30%. <sup>1</sup>H NMR (400 MHz, CDCl<sub>3</sub>) δ 8.13 (s, 1H), 7.79 (d, *J* = 7.2 Hz, 1H), 7.62–7.58 (m, 1H), 7.46 (s, 1H), 7.39–7.35 (m, 2H), 7.16 (s, 1H), 7.10 (s, 1H), 6.05 (s, 2H), 4.66–4.60 (m, 1H), 3.91 (s, 3H), 1.40 (d, *J* = 6.0 Hz, 6H).

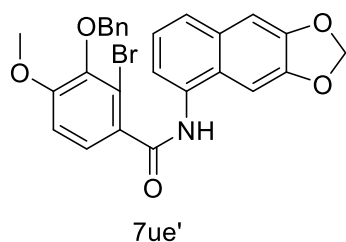

**3-(Benzyloxy)-2-bromo-4-methoxy-N-(naphtho[2,3-d][1,3]dioxol-5-yl)benzamide (7ue').**  
White solid, yield 70%. <sup>1</sup>H NMR (400 MHz, CDCl<sub>3</sub>) δ 7.95 (s, 1H), 7.82 (d, *J* = 7.2 Hz, 1H), 7.63–7.58 (m, 4H), 7.50–7.34 (m, 5H), 7.18 (s, 1H), 7.03 (d, *J* = 8.8 Hz, 1H), 6.08 (s, 2H), 5.11 (s, 2H), 3.97 (s, 3H).



## Characterization Data of the Target Products.

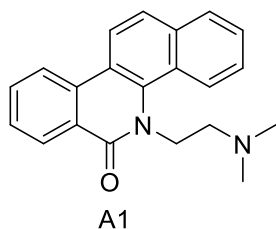

**5-(2-(Dimethylamino)ethyl)benzo[c]phenanthridin-6(5H)-one (A1).**<sup>5</sup> The compound **A1** was prepared from **4aa'**. White solid, yield 48%, mp = 79.5–80.9 °C. <sup>1</sup>H NMR (400 MHz, CDCl<sub>3</sub>) δ 8.56–8.51 (m, 1H), 8.34–8.30 (m, 1H), 8.26 (d, *J* = 8.0 Hz, 1H), 8.21 (d, *J* = 8.8 Hz, 1H), 7.91–7.86 (m, 1H), 7.81–7.75 (m, 1H), 7.72 (d, *J* = 8.8 Hz, 1H), 7.62–7.56 (m, 1H), 7.55–7.50 (m, 2H), 4.74 (t, *J* = 6.8 Hz, 2H), 2.78 (t, *J* = 6.8 Hz, 2H), 2.16 (s, 6H). <sup>13</sup>C NMR (100 MHz, CDCl<sub>3</sub>) δ 165.1, 136.2, 134.9, 134.1, 132.9, 128.8, 128.7, 128.1, 126.6, 126.0, 125.5, 125.4, 124.8, 124.3, 122.2, 120.1, 118.1, 57.7, 50.4, 45.7. HRMS (ESI) *m/z*: 317.1643 [M + H]<sup>+</sup>, calcd for C<sub>21</sub>H<sub>21</sub>N<sub>2</sub>O 317.1648.

Using intermediate **4ab'** as material, the reaction gave two target products **A2** (48%) and **A5** (10%) at the same time.

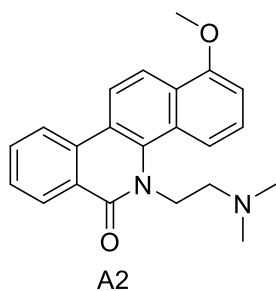

**5-(2-(Dimethylamino)ethyl)-1-methoxybenzo[c]phenanthridin-6(5H)-one (A2).**<sup>5</sup> White solid, mp = 139.4–140.0 °C. <sup>1</sup>H NMR (400 MHz, CDCl<sub>3</sub>) δ 8.53 (d, *J* = 8.0 Hz, 1H), 8.27 (d, *J* = 8.0 Hz, 1H), 8.09 (d, *J* = 8.8 Hz, 1H), 7.83–7.75 (m, 2H), 7.67 (d, *J* = 8.8 Hz, 1H), 7.62–7.56 (m, 2H), 7.21 (d, *J* = 8.8 Hz, 1H), 4.74 (t, *J* = 6.8 Hz, 2H), 4.00 (s, 3H), 2.75 (t, *J* = 6.8 Hz, 2H), 2.13 (s, 6H). <sup>13</sup>C NMR (100 MHz, CDCl<sub>3</sub>) δ 165.4, 157.4, 135.2, 134.2, 132.9, 130.3, 130.2, 128.8, 128.1, 126.0, 125.9, 124.2, 122.3, 119.0, 118.7, 117.8, 105.2, 57.8, 55.7, 50.1, 45.7. HRMS (ESI) *m/z*: 347.1745 [M + H]<sup>+</sup>, calcd for C<sub>22</sub>H<sub>23</sub>N<sub>2</sub>O<sub>2</sub> 347.1754.

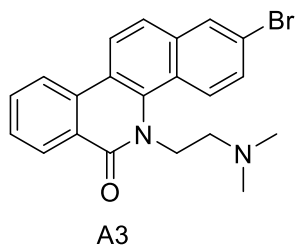

**5-(2-(Dimethylamino)ethyl)-2-bromobenzo[c]phenanthridin-6(5H)-one (A3).**<sup>5</sup> The compound **A3** was prepared from **4ac**<sup>7</sup>. White solid, yield 10%, mp = 115.4–119.7 °C. <sup>1</sup>H NMR (400 MHz, CDCl<sub>3</sub>) δ 8.53 (d, *J* = 7.6 Hz, 1H), 8.27–8.21 (m, 3H), 8.04 (d, *J* = 1.6 Hz, 1H), 7.83–7.76 (m, 1H), 7.64–7.58 (m, 3H), 4.66 (t, *J* = 6.8 Hz, 2H), 2.79 (t, *J* = 6.8 Hz, 2H), 2.16 (s, 6H). <sup>13</sup>C NMR (100 MHz, CDCl<sub>3</sub>) δ 165.0, 136.3, 136.0, 133.8, 133.1, 130.6, 128.8, 128.6, 128.4, 127.2, 125.9, 123.3, 122.2, 121.4, 120.8, 118.3, 57.8, 50.5, 45.8. HRMS (ESI) *m/z*: 395.0764 [M + H]<sup>+</sup>, calcd for C<sub>21</sub>H<sub>20</sub>N<sub>2</sub>OBr 395.0754.

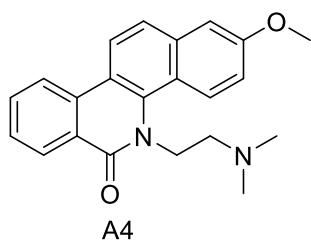

**5-(2-(Dimethylamino)ethyl)-2-methoxybenzo[c]phenanthridin-6(5H)-one (A4).**<sup>5</sup> The compound **A4** was synthesized from the nucleophilic substitution reaction of **A3**. White solid, yield 47%, mp = 85.5–86.1 °C. <sup>1</sup>H NMR (400 MHz, CDCl<sub>3</sub>) δ 8.51 (d, *J* = 8.0 Hz, 1H), 8.29–8.21 (m, 2H), 8.18 (d, *J* = 8.4 Hz, 1H), 7.79–7.72 (m, 1H), 7.63 (d, *J* = 8.8 Hz, 1H), 7.60–7.52 (m, 1H), 7.23–7.16 (m, 2H), 4.71 (t, *J* = 6.8 Hz, 2H), 3.97 (s, 3H), 2.82 (t, *J* = 6.8 Hz, 2H), 2.19 (s, 6H). <sup>13</sup>C NMR (100 MHz, CDCl<sub>3</sub>) δ 165.2, 158.1, 136.7, 136.6, 134.4, 132.8, 128.8, 127.7, 127.1, 125.6, 123.4, 121.9, 120.8, 119.8, 117.4, 116.5, 107.3, 57.7, 55.6, 50.4, 45.7. HRMS (ESI) *m/z*: 347.1745 [M + H]<sup>+</sup>, calcd for C<sub>22</sub>H<sub>23</sub>N<sub>2</sub>O<sub>2</sub> 347.1754.

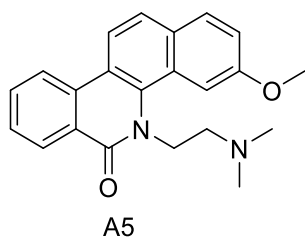

**5-(2-(Dimethylamino)ethyl)-3-methoxybenzo[c]phenanthridin-6(5H)-one (A5).**<sup>5</sup> White solid, yield 10%, mp = 83.2–85.2 °C. <sup>1</sup>H NMR (400 MHz, CDCl<sub>3</sub>) δ 8.53 (dd, *J* = 8.0, 1.2 Hz, 1H), 8.28

(d,  $J = 8.0$  Hz, 1H), 8.21 (s, 2H), 7.83 (d,  $J = 8.8$  Hz, 1H), 7.81–7.76 (m, 1H), 7.62–7.57 (m, 1H), 7.47–7.42 (m, 1H), 6.90 (d,  $J = 8.0$  Hz, 1H), 4.76 (t,  $J = 7.2$  Hz, 2H), 4.05 (s, 3H), 2.74 (t,  $J = 7.2$  Hz, 2H), 2.16 (s, 6H).  $^{13}\text{C}$  NMR (100 MHz,  $\text{CDCl}_3$ )  $\delta$  165.2, 155.8, 135.8, 134.0, 132.9, 128.8, 128.2, 126.8, 126.0, 125.8, 125.6, 122.3, 119.3, 118.8, 118.2, 117.6, 104.9, 57.4, 55.9, 50.1, 45.6. HRMS (ESI)  $m/z$ : 347.1756  $[\text{M} + \text{H}]^+$ , calcd for  $\text{C}_{22}\text{H}_{23}\text{N}_2\text{O}_2$  347.1754.

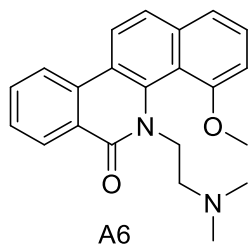

**5-(2-(Dimethylamino)ethyl)-4-methoxybenzo[c]phenanthridin-6(5H)-one (A6).**<sup>6</sup> The compound **A6** was prepared from **7ad'**. White solid, yield 45%, mp = 78.2–78.8 °C.  $^1\text{H}$  NMR (400 MHz,  $\text{CDCl}_3$ )  $\delta$  8.54 (dd,  $J = 8.0, 0.8$  Hz, 1H), 8.22 (d,  $J = 8.0$  Hz, 1H), 8.14 (d,  $J = 8.4$  Hz, 1H), 7.79–7.73 (m, 1H), 7.62 (d,  $J = 8.4$  Hz, 1H), 7.60–7.55 (m, 1H), 7.48–7.42 (m, 2H), 6.91 (dd,  $J = 6.0, 2.4$  Hz, 1H), 5.04–4.96 (m, 1H), 4.10–4.00 (m, 1H), 3.97 (s, 3H), 2.45–2.36 (m, 1H), 2.06–1.97 (m, 1H), 1.91 (s, 6H).  $^{13}\text{C}$  NMR (100 MHz,  $\text{CDCl}_3$ )  $\delta$  163.4, 155.7, 136.5, 134.7, 133.8, 132.6, 128.7, 127.8, 127.4, 126.1, 123.4, 122.0, 120.4, 120.2, 118.2, 116.6, 106.4, 57.2, 55.7, 50.2, 45.4. HRMS (ESI)  $m/z$ : 347.1733  $[\text{M} + \text{H}]^+$ , calcd for  $\text{C}_{22}\text{H}_{23}\text{N}_2\text{O}_2$  347.1754.

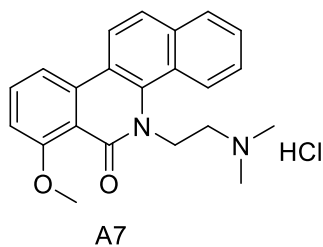

**5-(2-(Dimethylamino)ethyl)-7-methoxybenzo[c]phenanthridin-6(5H)-one (A7).**<sup>6</sup> The compound **A7** was prepared from **7ca'** as a hydrochloric acid salt. Yellow solid, yield 35%, mp = 125.6–129.3 °C.  $^1\text{H}$  NMR (400 MHz,  $\text{D}_2\text{O}$ )  $\delta$  7.60 (d,  $J = 8.0$  Hz, 1H), 7.49 (dd,  $J = 8.0, 7.6$  Hz, 1H), 7.45–7.36 (m, 2H), 7.11 (d,  $J = 8.8$  Hz, 1H), 7.05–6.99 (m, 2H), 6.99–6.93 (m, 2H), 3.94 (s, 3H), 3.77 (t,  $J = 5.6$  Hz, 2H), 3.31 (t,  $J = 5.6$  Hz, 2H), 2.89 (s, 6H).  $^{13}\text{C}$  NMR (100 MHz,  $\text{D}_2\text{O}$ )  $\delta$  163.9, 159.6, 135.4, 134.6, 133.8, 133.1, 128.7, 126.8, 125.7, 124.4, 123.2, 122.2, 119.5, 117.1, 114.22, 112.0, 110.5, 57.2, 55.8, 46.7, 43.4. HRMS (ESI)  $m/z$ : 347.1742  $[\text{M} + \text{H}]^+$ , calcd for  $\text{C}_{22}\text{H}_{23}\text{N}_2\text{O}_2$  347.1754.

Using intermediate **4ca'** as material, the reaction gave two target products, **A8** (24%) and the demethylated product **A9** (36%) at the same time.

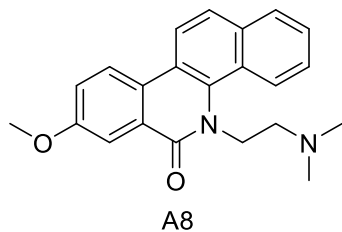

**5-(2-(Dimethylamino)ethyl)-8-methoxybenzo[c]phenanthridin-6(5H)-one (A8).**<sup>5</sup> White solid, mp = 102.3–103.5 °C. <sup>1</sup>H NMR (400 MHz, CDCl<sub>3</sub>) δ 8.31 (d, *J* = 8.0 Hz, 1H), 8.19 (d, *J* = 8.8 Hz, 1H), 8.15 (d, *J* = 8.8 Hz, 1H), 7.95 (d, *J* = 2.4 Hz, 1H), 7.91–7.86 (m, 1H), 7.71 (d, *J* = 8.8 Hz, 1H), 7.55–7.48 (m, 2H), 7.37 (dd, *J* = 8.8, 2.4 Hz, 1H), 4.74 (t, *J* = 6.8 Hz, 2H), 3.98 (s, 3H), 2.82 (t, *J* = 6.8 Hz, 2H), 2.20 (s, 6H). <sup>13</sup>C NMR (100 MHz, CDCl<sub>3</sub>) δ 164.9, 159.7, 134.5, 134.4, 128.8, 127.7, 127.2, 126.2, 125.4, 125.2, 124.8, 124.4, 124.0, 122.9, 120.0, 118.2, 109.0, 57.7, 55.8, 50.4, 45.8. HRMS (ESI) *m/z*: 347.1749 [M + H]<sup>+</sup>, calcd for C<sub>22</sub>H<sub>23</sub>N<sub>2</sub>O<sub>2</sub> 347.1754.

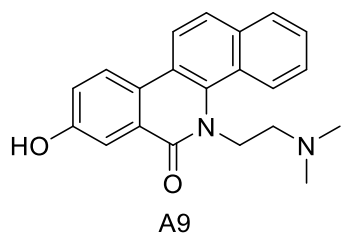

**5-(2-(Dimethylamino)ethyl)-8-hydroxybenzo[c]phenanthridin-6(5H)-one (A9).**<sup>5</sup> White solid, mp = 244.2–244.8 °C. <sup>1</sup>H NMR (400 MHz, DMSO) δ 10.24 (s, 1H), 8.39 (d, *J* = 8.8 Hz, 1H), 8.36 (d, *J* = 8.8 Hz, 1H), 8.34–8.30 (m, 1H), 8.03–7.97 (m, 1H), 7.81 (d, *J* = 8.8 Hz, 1H), 7.69 (d, *J* = 2.4 Hz, 1H), 7.58–7.53 (m, 2H), 7.31 (dd, *J* = 8.8, 2.4 Hz, 1H), 4.63 (t, *J* = 6.8 Hz, 2H), 2.56 (t, *J* = 6.8 Hz, 2H), 1.93 (s, 6H). <sup>13</sup>C NMR (100 MHz, DMSO) δ 163.5, 157.6, 133.6, 133.4, 128.5, 126.7, 125.9, 125.6, 125.2, 124.8, 124.7, 124.1, 124.0, 122.1, 120.2, 117.8, 111.9, 56.9, 49.2, 45.1. HRMS (ESI) *m/z*: 333.1598 [M + H]<sup>+</sup>, calcd for C<sub>21</sub>H<sub>21</sub>N<sub>2</sub>O<sub>2</sub> 333.1525.

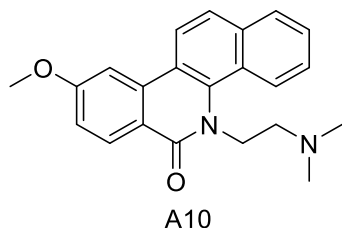

**5-(2-(Dimethylamino)ethyl)-9-methoxybenzo[c]phenanthridin-6(5H)-one (A10).**<sup>5</sup> The compound **A10** was prepared from **4ba'**. Pale yellow solid, yield 24%, mp = 82.4–85.3 °C. <sup>1</sup>H NMR (400 MHz, CDCl<sub>3</sub>) δ 8.47 (d, *J* = 8.8 Hz, 1H), 8.34–8.29 (m, 1H), 8.14 (d, *J* = 8.8 Hz, 1H), 7.92–7.88 (m, 1H), 7.71 (d, *J* = 8.8 Hz, 1H), 7.63 (d, *J* = 2.4 Hz, 1H), 7.55–7.50 (m, 2H), 7.15 (dd, *J* = 8.8, 2.4 Hz, 1H), 4.71 (t, *J* = 6.8 Hz, 2H), 4.00 (s, 3H), 2.76 (t, *J* = 6.8 Hz, 2H), 2.16 (s, 6H). <sup>13</sup>C NMR (100 MHz, CDCl<sub>3</sub>) δ 164.9, 163.4, 136.8, 136.1, 135.0, 131.0, 128.7, 126.7, 125.5, 125.4, 124.8, 124.1, 120.1, 119.7, 117.9, 116.0, 105.1, 57.7, 55.7, 50.2, 45.7. HRMS (ESI) *m/z*: 347.1762 [M + H]<sup>+</sup>, calcd for C<sub>22</sub>H<sub>23</sub>N<sub>2</sub>O<sub>2</sub> 347.1754.

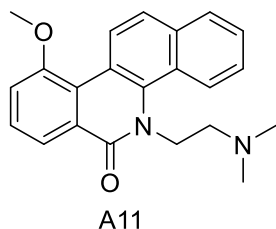

**5-(2-(Dimethylamino)ethyl)-10-methoxybenzo[c]phenanthridin-6(5H)-one (A11).**<sup>6</sup> The compound **A11** was prepared from **7ba'**. White solid, yield 40%, mp = 85.6–87.2 °C. <sup>1</sup>H NMR (400 MHz, CDCl<sub>3</sub>) δ 9.21 (d, *J* = 8.8 Hz, 1H), 8.23–8.17 (m, 2H), 7.91–7.87 (m, 1H), 7.68 (d, *J* = 8.8 Hz, 1H), 7.55–7.49 (m, 3H), 7.31 (d, *J* = 8.0 Hz, 1H), 4.79 (t, *J* = 6.8 Hz, 2H), 4.09 (s, 3H), 2.68 (t, *J* = 6.8 Hz, 2H), 2.15 (s, 6H). <sup>13</sup>C NMR (100 MHz, CDCl<sub>3</sub>) δ 164.7, 157.4, 135.4, 134.0, 128.5, 128.1, 126.4, 125.4, 125.0, 124.9, 124.35, 123.8, 123.4, 121.1, 118.9, 115.1, 111.6, 57.2, 56.2, 50.4, 45.5. HRMS (ESI) *m/z*: 347.1736 [M + H]<sup>+</sup>, calcd for C<sub>22</sub>H<sub>23</sub>N<sub>2</sub>O<sub>2</sub> 347.1754.

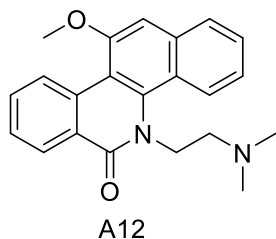

**5-(2-(Dimethylamino)ethyl)-11-methoxybenzo[c]phenanthridin-6(5H)-one (A12).** The compound **A12** was prepared from **7ab'**. Yellow gel, yield: 65%. <sup>1</sup>H NMR (400 MHz, CDCl<sub>3</sub>) δ 9.18 (d, *J* = 8.4 Hz, 1H), 8.56 (dd, *J* = 8.0, 1.2 Hz, 1H), 8.08 (d, *J* = 8.4 Hz, 1H), 7.78–7.70 (m, 2H), 7.60–7.55 (m, 1H), 7.50–7.45 (m, 1H), 7.38–7.33 (m, 1H), 7.10 (s, 1H), 4.74 (t, *J* = 6.8 Hz, 2H), 4.15 (s, 3H), 2.57 (t, *J* = 6.8 Hz, 2H), 2.07 (s, 6H). <sup>13</sup>C NMR (100 MHz, CDCl<sub>3</sub>) δ 165.0, 156.1, 138.4, 134.2, 133.6, 132.6, 128.3, 127.8, 127.6, 127.2, 127.0, 126.1, 125.6, 123.0, 120.6,

112.6, 102.6, 57.5, 55.9, 51.0, 45.6. HRMS (ESI)  $m/z$ : 347.1750  $[M + H]^+$ , calcd for  $C_{22}H_{23}N_2O_2$  347.1754.

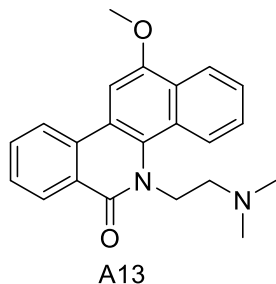

**5-(2-(Dimethylamino)ethyl)-12-methoxybenzo[*c*]phenanthridin-6(5H)-one (A13).** The compound **A13** was prepared from **7ac'**. White solid, yield 45%, mp = 129.9–130.5 °C.  $^1H$  NMR (400 MHz,  $CDCl_3$ )  $\delta$  9.18 (d,  $J$  = 8.4 Hz, 1H), 8.56 (dd,  $J$  = 8.0, 1.2 Hz, 1H), 8.08 (d,  $J$  = 8.4 Hz, 1H), 7.78–7.70 (m, 2H), 7.61–7.55 (m, 1H), 7.50–7.44 (m, 1H), 7.38–7.33 (m, 1H), 7.10 (s, 1H), 4.78–4.72 (t,  $J$  = 6.8 Hz, 2H), 4.15 (s, 3H), 2.60–2.54 (t,  $J$  = 6.8 Hz, 2H), 2.07 (s, 6H).  $^{13}C$  NMR (100 MHz,  $CDCl_3$ )  $\delta$  164.9, 152.1, 134.0, 132.6, 130.3, 128.9, 128.0, 127.1, 126.3, 126.1, 126.0, 125.8, 125.1, 122.7, 122.0, 118.1, 97.3, 57.6, 55.8, 50.2, 45.7. HRMS (ESI)  $m/z$ : 347.1765  $[M + H]^+$ , calcd for  $C_{22}H_{23}N_2O_2$  347.1754.

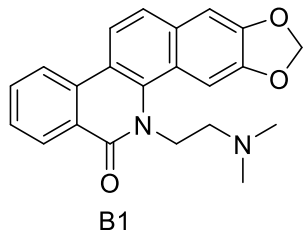

**12-(2-(Dimethylamino)ethyl)-[1,3]dioxolo[4',5':4,5]benzo[1,2-*c*]phenanthridin-13(12H)-one (B1).**<sup>5</sup> The compound **B1** was prepared from **4ad'**. White solid, yield 80%, mp = 129.1–131.4 °C.  $^1H$  NMR (400 MHz,  $CDCl_3$ )  $\delta$  8.48 (d,  $J$  = 8.0 Hz, 1H), 8.22 (d,  $J$  = 8.0 Hz, 1H), 8.07 (d,  $J$  = 8.4 Hz, 1H), 7.78–7.74 (m, 1H), 7.59–7.53 (m, 3H), 7.17 (s, 1H), 6.11 (s, 2H), 4.75 (t,  $J$  = 6.0 Hz, 2H), 2.87 (t,  $J$  = 6.0 Hz, 2H), 2.29 (s, 6H).  $^{13}C$  NMR (100 MHz,  $CDCl_3$ )  $\delta$  165.4, 148.0, 147.7, 135.9, 134.3, 132.9, 132.4, 128.8, 127.9, 125.7, 123.8, 122.0, 121.2, 118.6, 117.9, 105.0, 102.5, 101.8, 57.3, 49.7, 45.3. HRMS (ESI)  $m/z$ : 361.1550  $[M + H]^+$ , calcd for  $C_{22}H_{21}N_2O_3$  361.1547.

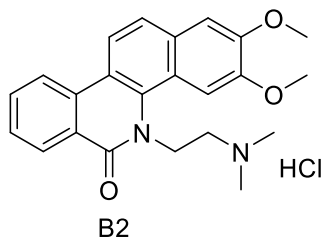

**5-(2-(Dimethylamino)ethyl)-2, 3-dimethoxybenzo[c]phenanthridin-6(5H)-one (B2).**<sup>5</sup> The compound **B2** was prepared from **4ae'** as a hydrochloric acid salt. White solid, yield 80%, mp = 172.8–174.9 °C. <sup>1</sup>H NMR (400 MHz, D<sub>2</sub>O) δ 7.86 (d, *J* = 8.0 Hz, 1H), 7.58–7.52 (m, 2H), 7.45–7.38 (m, 1H), 7.19 (d, *J* = 8.8 Hz, 1H), 6.79 (d, *J* = 8.8 Hz, 1H), 6.51 (s, 1H), 5.76 (s, 1H), 3.84 (t, *J* = 4.8 Hz, 2H), 3.67 (s, 3H), 3.66 (s, 3H), 3.20 (t, *J* = 4.8 Hz, 2H), 2.80 (s, 6H). <sup>13</sup>C NMR (100 MHz, D<sub>2</sub>O) δ 165.6, 147.8, 147.1, 133.8, 133.2, 131.3, 130.0, 128.1, 127.1, 123.4, 122.1, 121.7, 117.6, 116.8, 116.1, 107.2, 102.5, 57.5, 55.5, 55.2, 46.7, 43.4. HRMS (ESI) *m/z*: 377.1859 [M + H]<sup>+</sup>, calcd for C<sub>23</sub>H<sub>25</sub>N<sub>2</sub>O<sub>3</sub> 377.1860.

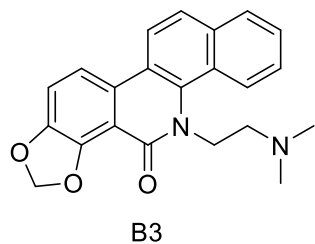

**12-(2-(Dimethylamino)ethyl)benzo[c][1,3]dioxolo[4,5-i]phenanthridin-13(12H)-one (B3).**<sup>5</sup> The compound **B3** was prepared from **7da'**. White solid, yield 30%, mp = 152.3–153.4 °C. <sup>1</sup>H NMR (400 MHz, CDCl<sub>3</sub>) δ 8.27–8.21 (m, 1H), 8.09 (d, *J* = 8.8 Hz, 1H), 7.90–7.86 (m, 1H), 7.77 (d, *J* = 8.8 Hz, 1H), 7.69 (d, *J* = 8.8 Hz, 1H), 7.54–7.49 (m, 2H), 7.26 (d, *J* = 8.8 Hz, 1H), 6.30 (s, 2H), 4.64 (t, *J* = 7.2 Hz, 2H), 2.84 (t, *J* = 7.2 Hz, 2H), 2.20 (s, 6H). <sup>13</sup>C NMR (100 MHz, CDCl<sub>3</sub>) δ 163.0, 148.2, 147.9, 135.1, 134.4, 128.8, 128.6, 126.3, 125.5, 125.1, 124.9, 124.5, 120.2, 118.5, 115.9, 113.4, 111.5, 103.1, 57.5, 49.9, 45.7. HRMS (ESI) *m/z*: 361.1548 [M + H]<sup>+</sup>, calcd for C<sub>22</sub>H<sub>21</sub>N<sub>2</sub>O<sub>3</sub> 361.1547.

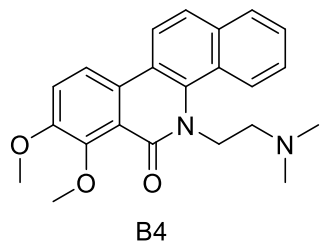

**5-(2-(Dimethylamino)ethyl)-7,8-dimethoxybenzo[*c*]phenanthridin-6(5H)-one (B4).**<sup>6</sup> The compound **B4** was prepared from **7ea'**. White solid, yield 35%, mp = 72.8–73.5 °C. <sup>1</sup>H NMR (400 MHz, CDCl<sub>3</sub>) δ 8.22 (dd, *J* = 8.8 Hz, 1.2 Hz, 1H), 8.09 (d, *J* = 8.8 Hz, 1H), 7.98 (d, *J* = 8.8 Hz, 1H), 7.88–7.83 (m, 1H), 7.68 (d, *J* = 8.8 Hz, 1H), 7.53–7.49 (m, 2H), 7.39 (d, 1H), 4.65 (t, *J* = 7.2 Hz, 2H), 4.07 (s, 3H), 3.98 (s, 3H), 2.80 (t, *J* = 7.2 Hz, 2H), 2.18 (s, 6H). <sup>13</sup>C NMR (100 MHz, CDCl<sub>3</sub>) δ 162.9, 153.0, 150.5, 135.1, 134.3, 128.9, 128.6, 126.3, 125.52, 125.2, 124.8, 124.3, 120.4, 112.0, 118.5, 118.1, 118.0, 61.9, 57.5, 56.8, 49.7, 45.7. HRMS (ESI) *m/z*: 377.1863 [M + H]<sup>+</sup>, calcd for C<sub>23</sub>H<sub>25</sub>N<sub>2</sub>O<sub>3</sub> 377.1860.

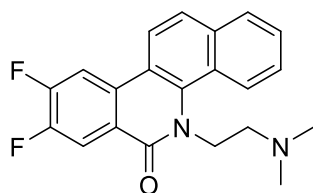

B5

**5-(2-(Dimethylamino)ethyl)-8,9-difluorobenzo[*c*]phenanthridin-6(5H)-one (B5).** The compound **B5** was prepared from **7fa'**. White solid, yield 80%, mp = 122.3–123.1 °C. <sup>1</sup>H NMR (400 MHz, CDCl<sub>3</sub>) δ 8.35–8.27 (m, 2H), 8.04–7.97 (m, 2H), 7.93–7.89 (m, 1H), 7.75 (d, *J* = 8.8 Hz, 1H), 7.59–7.54 (m, 2H), 4.73 (t, *J* = 6.8 Hz, 2H), 2.74 (t, *J* = 6.8 Hz, 2H), 2.12 (s, 6H). <sup>13</sup>C NMR (125 MHz, CDCl<sub>3</sub>) δ 163.6, 154.2 (dd, *J* = 255.4, 14.3 Hz), 150.5 (dd, *J* = 252.3, 14.1 Hz), 136.5, 135.0, 132.1 (dd, *J* = 7.7, 2.9 Hz), 128.8, 127.0, 125.8, 125.4, 124.8, 124.7, 123.2 (dd, *J* = 5.9, 2.3 Hz), 119.9, 117.1 (dd, *J* = 18.6, 1.9 Hz), 110.9, 110.7, 57.6, 50.6, 45.7. HRMS (ESI) *m/z*: 353.1418 [M + H]<sup>+</sup>, calcd for C<sub>21</sub>H<sub>19</sub>N<sub>2</sub>OF<sub>2</sub> 353.1460.

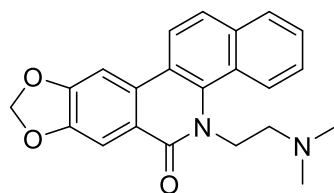

B6

**5-(2-(Dimethylamino)ethyl)benzo[*c*][1,3]dioxolo[4,5-*j*]phenanthridin-6(5H)-one (B6).**<sup>5</sup> The compound **B6** was prepared from **4da'**. White solid, yield 25%, mp = 111.2–113.5 °C. <sup>1</sup>H NMR (400 MHz, CDCl<sub>3</sub>) δ 8.35–8.29 (m, 1H), 8.04 (d, *J* = 8.4 Hz, 1H), 7.92–7.85 (m, 2H), 7.71 (d, *J* = 8.4 Hz, 1H), 7.63 (s, 1H), 7.56–7.48 (m, 2H), 6.12 (s, 2H), 4.72 (t, *J* = 6.8 Hz, 2H), 2.80 (t, *J* = 6.8 Hz, 2H), 2.18 (s, 6H). <sup>13</sup>C NMR (100 MHz, CDCl<sub>3</sub>) δ 164.3, 152.6, 148.5, 135.4, 134.5, 131.1,



128.7, 126.4, 125.4, 125.3, 124.7, 124.2, 121.6, 120.0, 117.9, 106.8, 102.1, 100.9, 57.8, 50.4, 45.8. HRMS (ESI)  $m/z$ : 361.1540  $[M + H]^+$ , calcd for  $C_{22}H_{21}N_2O_3$  361.1547.

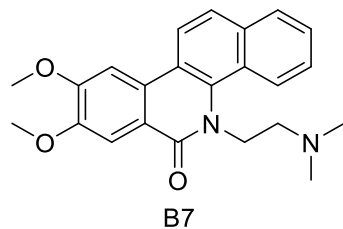

**5-(2-(Dimethylamino)ethyl)-8,9-dimethoxybenzo[c]phenanthridin-6(5H)-one (B7).**<sup>5</sup> The compound **B7** was prepared from **4ea'**. White solid, yield 20%, mp = 129.3–131.9 °C. <sup>1</sup>H NMR (400 MHz, CDCl<sub>3</sub>) δ 8.36–8.31 (m, 1H), 8.12 (d,  $J$  = 8.8 Hz, 1H), 7.94 (s, 1H), 7.92–7.89 (m, 1H), 7.73 (d,  $J$  = 8.8 Hz, 1H), 7.62 (s, 1H), 7.56–7.51 (m, 2H), 4.74 (t,  $J$  = 7.2 Hz, 2H), 4.12 (s, 3H), 4.07 (s, 3H), 2.85 (t,  $J$  = 7.2 Hz, 2H), 2.23 (s, 6H). <sup>13</sup>C NMR (100 MHz, CDCl<sub>3</sub>) δ 164.6, 153.8, 150.1, 135.4, 134.5, 129.0, 128.7, 126.4, 125.5, 125.3, 124.8, 124.2, 120.0, 119.9, 117.9, 108.9, 103.2, 57.6, 56.4, 56.3, 50.0, 45.6. HRMS (ESI)  $m/z$ : 377.1850  $[M + H]^+$ , calcd for  $C_{23}H_{25}N_2O_3$  377.1860.

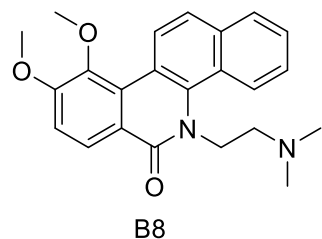

**5-(2-(Dimethylamino)ethyl)-9,10-dimethoxybenzo[c]phenanthridin-6(5H)-one (B8).**<sup>6</sup> The compound **B8** was prepared from **7ga'**. White solid, yield 30%, mp = 86.4°C–87.4 °C. <sup>1</sup>H NMR (400 MHz, CDCl<sub>3</sub>) δ 9.18 (d,  $J$  = 8.8 Hz, 1H), 8.38 (d,  $J$  = 8.8 Hz, 1H), 8.21 (d,  $J$  = 8.0 Hz, 1H), 7.88 (d,  $J$  = 8.0 Hz, 1H), 7.70 (d,  $J$  = 8.8 Hz, 1H), 7.56–7.46 (m, 2H), 7.22 (d,  $J$  = 8.8 Hz, 1H), 4.71 (t,  $J$  = 6.8 Hz, 2H), 4.03 (s, 3H), 3.90 (s, 3H), 2.63 (t,  $J$  = 6.8 Hz, 2H), 2.10 (s, 6H). <sup>13</sup>C NMR (125 MHz, CDCl<sub>3</sub>) δ 164.9, 157.0, 145.8, 136.4, 134.5, 128.2, 128.0, 126.6, 126.0, 125.6, 124.9, 124.6, 124.2, 123.8, 120.9, 118.4, 112.6, 60.4, 57.5, 56.4, 50.5, 45.6. HRMS (ESI)  $m/z$ : 377.1848  $[M + H]^+$ , calcd for  $C_{23}H_{25}N_2O_3$  377.1860.

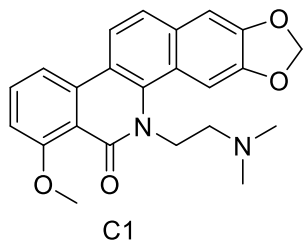

**12-(2-(Dimethylamino)ethyl)-1-methoxy-[1,3]dioxolo[4',5':4,5]benzo[1,2-c]phenanthridine-13(12H)-one (C1).** The compound **C1** was prepared from **7he'**. White solid, yield 50%, mp = 133.6–134.2 °C. <sup>1</sup>H NMR (400 MHz, CDCl<sub>3</sub>) δ 7.99 (d, *J* = 8.8 Hz, 1H), 7.79 (d, *J* = 8.8 Hz, 1H), 7.67–7.61 (m, 1H), 7.60 (s, 1H), 7.50 (d, *J* = 8.8 Hz, 1H), 7.14 (s, 1H), 7.01 (d, *J* = 8.8 Hz, 1H), 6.08 (s, 2H), 4.52 (t, *J* = 6.8 Hz, 2H), 4.04 (s, 3H), 2.80 (t, *J* = 6.8 Hz, 2H), 2.20 (s, 6H). <sup>13</sup>C NMR (100 MHz, CDCl<sub>3</sub>) δ 163.4, 161.4, 148.0, 147.5, 137.1, 136.8, 133.4, 132.3, 123.3, 121.0, 119.1, 117.8, 115.2, 114.1, 110.1, 104.7, 102.8, 101.7, 57.8, 56.5, 50.0, 45.8. HRMS (ESI) *m/z*: 391.1621 [M + H]<sup>+</sup>, calcd for C<sub>23</sub>H<sub>23</sub>N<sub>2</sub>O<sub>4</sub> 391.1652.

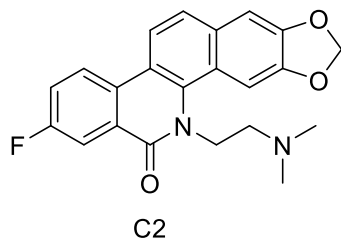

**12-(2-(Dimethylamino)ethyl)-2-fluor-[1,3]dioxolo[4',5':4,5]benzo[1,2-c]phenanthridine-13(12H)-one (C2).** The compound **C2** was prepared from **7ie'**. White solid, yield 46%, mp = 152.8–153.4 °C. <sup>1</sup>H NMR (400 MHz, CDCl<sub>3</sub>) δ 8.23–8.18 (m, 1H), 8.14 (dd, *J* = 8.8, 2.8 Hz, 1H), 8.00 (d, *J* = 8.4 Hz, 1H), 7.63 (s, 1H), 7.56 (d, *J* = 8.4 Hz, 1H), 7.49–7.44 (m, 1H), 7.17 (s, 1H), 6.10 (s, 2H), 4.64 (t, *J* = 6.8 Hz, 2H), 2.69 (t, *J* = 6.8 Hz, 2H), 2.14 (s, 6H). <sup>13</sup>C NMR (100 MHz, CDCl<sub>3</sub>) δ 164.5 (d, *J* = 3.2 Hz), 162.2 (d, *J* = 249.0 Hz), 148.0, 147.7, 135.5, 132.20, 130.8 (d, *J* = 2.5 Hz), 127.6 (d, *J* = 7.8 Hz), 124.6 (d, *J* = 7.8 Hz), 123.9, 121.2 (d, *J* = 23.3 Hz), 121.1, 118.5, 117.3, 114.1 (d, *J* = 22.8 Hz), 105.0, 102.6, 101.8, 57.6, 50.5, 45.7. HRMS (ESI) *m/z*: 379.1432 [M + H]<sup>+</sup>, calcd for C<sub>22</sub>H<sub>20</sub>N<sub>2</sub>O<sub>3</sub>F 379.1452.

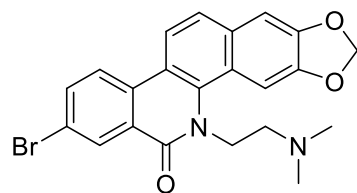

C3

**12-(2-(Dimethylamino)ethyl)-2-bromo-[1,3]dioxolo[4',5':4,5]benzo[1,2-c]phenanthridin-**

**13(12H)-one (C3).** The compound **C3** was prepared from **7je'**. White solid, yield 19%, mp = 172.6–174.1 °C. <sup>1</sup>H NMR (400 MHz, CDCl<sub>3</sub>) δ 8.49 (dd, *J* = 8.0, 1.2 Hz, 1H), 8.22 (d, *J* = 8.0 Hz, 1H), 8.07 (d, *J* = 8.8 Hz, 1H), 7.78–7.73 (m, 1H), 7.60 (s, 1H), 7.56–7.53 (m, 1H), 7.17 (s, 1H), 6.10 (s, 2H), 4.67 (t, *J* = 6.8 Hz, 2H), 2.75 (t, *J* = 6.8 Hz, 2H), 2.19 (s, 6H). <sup>13</sup>C NMR (100 MHz, CDCl<sub>3</sub>) δ 165.4, 147.9, 147.6, 135.9, 134.2, 132.8, 132.3, 128.7, 127.8, 125.7, 123.7, 122.0, 121.2, 118.6, 117.8, 104.9, 102.6, 101.7, 57.5, 50.1, 45.6. HRMS (ESI) *m/z*: 439.0675 [M + H]<sup>+</sup>, calcd for C<sub>22</sub>H<sub>20</sub>N<sub>2</sub>O<sub>3</sub>Br 439.0652.

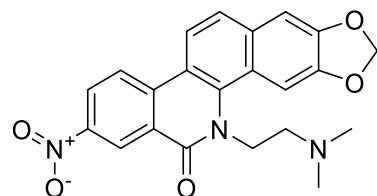

C4

**12-(2-(Dimethylamino)ethyl)-2-nitro-[1,3]dioxolo[4',5':4,5]benzo[1,2-c]phenanthridin-**

**13(12H)-one (C4).** The compound **C4** was prepared from **7ke'**. Pale red solid, yield 29%, mp = 167.7–168.4 °C. <sup>1</sup>H NMR (400 MHz, CDCl<sub>3</sub>) δ 9.34 (d, *J* = 2.4 Hz, 1H), 8.53 (dd, *J* = 8.8, 2.4 Hz, 1H), 8.35 (d, *J* = 8.8 Hz, 1H), 8.05 (d, *J* = 8.8 Hz, 1H), 7.66 (s, 1H), 7.61 (d, *J* = 8.8 Hz, 1H), 7.20 (s, 1H), 6.14 (s, 2H), 4.68 (t, *J* = 6.8 Hz, 2H), 2.68 (t, *J* = 6.8 Hz, 2H), 2.09 (s, 6H). <sup>13</sup>C NMR (100 MHz, CDCl<sub>3</sub>) δ 163.9, 148.9, 148.0, 146.7, 139.1, 138.0, 133.6, 126.7, 126.0, 124.9, 124.3, 123.5, 121.0, 118.8, 116.3, 105.0, 102.8, 102.0, 57.4, 50.7, 45.6. HRMS (ESI) *m/z*: 406.1339 [M + H]<sup>+</sup>, calcd for C<sub>22</sub>H<sub>20</sub>N<sub>3</sub>O<sub>5</sub> 406.1397.

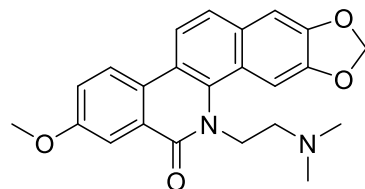

C5

**12-(2-(Dimethylamino)ethyl)-2-methoxy-[1,3]dioxolo[4',5':4,5]benzo[1,2-c]phenanthridine-13(12H)-one (C5).** The compound **C5** was prepared from **7le'**. White solid, yield 53%, mp = 141.5–142.1 °C. <sup>1</sup>H NMR (400 MHz, CDCl<sub>3</sub>) δ 8.13 (d, *J* = 8.8 Hz, 1H), 7.99 (d, *J* = 8.8 Hz, 1H), 7.92 (d, *J* = 2.8 Hz, 1H), 7.62 (s, 1H), 7.53 (d, *J* = 8.8 Hz, 1H), 7.34 (dd, *J* = 8.8, 2.8 Hz, 1H), 7.15 (s, 1H), 6.08 (s, 2H), 4.64 (t, *J* = 6.8 Hz, 2H), 3.96 (s, 3H), 2.75 (t, *J* = 6.8 Hz, 2H), 2.17 (s, 6H). <sup>13</sup>C NMR (100 MHz, CDCl<sub>3</sub>) δ 165.1, 159.5, 147.5, 134.6, 131.7, 127.9, 126.9, 123.8, 123.7, 122.7, 121.1, 118.4, 117.8, 109.0, 104.9, 102.5, 101.6, 57.7, 55.8, 50.3, 45.7. HRMS (ESI) *m/z*: 391.1647 [M + H]<sup>+</sup>, calcd for C<sub>23</sub>H<sub>23</sub>N<sub>2</sub>O<sub>4</sub> 391.1652.

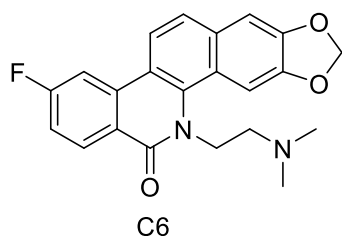

**12-(2-(Dimethylamino)ethyl)-3-fluoro-[1,3]dioxolo[4',5':4,5]benzo[1,2-c]phenanthridin-13(12H)-one (C6).** The compound **C6** was prepared from **7me'**. White solid, yield 48%, mp = 141.7–142.4 °C. <sup>1</sup>H NMR (400 MHz, CDCl<sub>3</sub>) δ 8.50 (dd, *J* = 8.8, 6.0 Hz, 1H), 7.92 (d, *J* = 8.8 Hz, 1H), 7.81 (dd, *J* = 10.4, 2.4 Hz, 1H), 7.64 (s, 1H), 7.55 (d, *J* = 8.8 Hz, 1H), 7.26 – 7.21 (m, 1H), 7.17 (s, 1H), 6.11 (s, 2H), 4.63 (t, *J* = 6.8 Hz, 2H), 2.71 (t, *J* = 6.8 Hz, 2H), 2.14 (s, 6H). <sup>13</sup>C NMR (100 MHz, CDCl<sub>3</sub>) δ 166.0 (d, *J* = 253.1 Hz), 164.7, 148.2, 147.7, 136.9 (d, *J* = 9.5 Hz), 136.8, 132.8, 131.9 (d, *J* = 10.0 Hz), 123.8, 122.3, 121.2, 118.6, 117.1 (d, *J* = 2.8 Hz), 116.0 (d, *J* = 23.1 Hz), 107.9 (d, *J* = 23.5 Hz), 105.0, 102.8, 101.8, 57.7, 50.4, 45.7. HRMS (ESI) *m/z*: 379.1417 [M + H]<sup>+</sup>, calcd for C<sub>22</sub>H<sub>20</sub>N<sub>2</sub>O<sub>3</sub>F 379.1452.

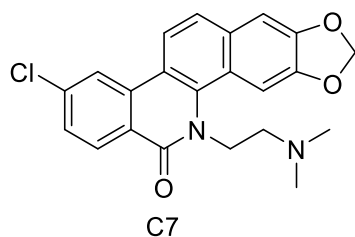

**12-(2-(Dimethylamino)ethyl)-3-chloro-[1,3]dioxolo[4',5':4,5]benzo[1,2-c]phenanthridin-13(12H)-one (C7).** The compound **C7** was prepared from **7ne'**. White solid, yield 51%, mp = 127.6–129.1 °C. <sup>1</sup>H NMR (400 MHz, CDCl<sub>3</sub>) δ 8.42 (d, *J* = 8.8 Hz, 1H), 8.17 (d, *J* = 2.0 Hz, 1H), 7.96 (d, *J* = 8.8 Hz, 1H), 7.63 (s, 1H), 7.55 (d, *J* = 8.8 Hz, 1H), 7.49 (dd, *J* = 8.8, 2.0 Hz, 1H), 7.17 (s, 1H), 6.10 (s, 2H), 4.62 (t, *J* = 6.8 Hz, 2H), 2.69 (t, *J* = 6.8 Hz, 2H), 2.13 (s, 6H). <sup>13</sup>C NMR (100

MHz, CDCl<sub>3</sub>)  $\delta$  164.7, 148.2, 147.7, 139.5, 136.8, 135.7, 132.7, 130.5, 128.1, 124.1, 123.8, 121.9, 121.1, 118.5, 116.7, 104.9, 102.7, 101.8, 57.6, 50.5, 45.7. HRMS (ESI)  $m/z$ : 395.1128 [M + H]<sup>+</sup>, calcd for C<sub>22</sub>H<sub>20</sub>N<sub>2</sub>O<sub>3</sub>Cl 395.1157.

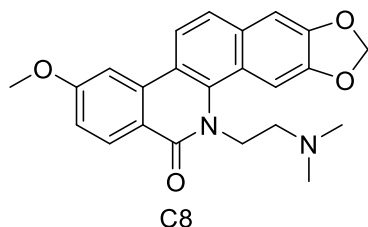

**12-(2-(Dimethylamino)ethyl)-3-methoxy-[1,3]dioxolo[4',5':4,5]benzo[1,2-c]phenanthridine-13(12H)-one (C8).** The compound **C8** was prepared from **7oe'**. White solid, yield 57%, mp = 133.2–134.4 °C. <sup>1</sup>H NMR (400 MHz, CDCl<sub>3</sub>)  $\delta$  8.43 (d,  $J$  = 8.8 Hz, 1H), 7.97 (d,  $J$  = 8.8 Hz, 1H), 7.62 (s, 1H), 7.57 (d,  $J$  = 2.4 Hz, 1H), 7.52 (d,  $J$  = 8.8 Hz, 1H), 7.15 (s, 1H), 7.11 (dd,  $J$  = 8.8, 2.4 Hz, 1H), 6.09 (s, 2H), 4.61 (t,  $J$  = 6.8 Hz, 2H), 3.99 (s, 3H), 2.69 (t,  $J$  = 6.8 Hz, 2H), 2.15 (s, 6H). <sup>13</sup>C NMR (100 MHz, CDCl<sub>3</sub>)  $\delta$  165.2, 163.3, 147.9, 147.5, 136.7, 136.2, 132.4, 130.9, 123.4, 121.2, 119.6, 118.6, 117.6, 115.6, 104.9, 104.8, 102.8, 101.7, 57.8, 55.7, 50.3, 45.7. HRMS (ESI)  $m/z$ : 391.1621 [M + H]<sup>+</sup>, calcd for C<sub>23</sub>H<sub>23</sub>N<sub>2</sub>O<sub>4</sub> 391.1652.

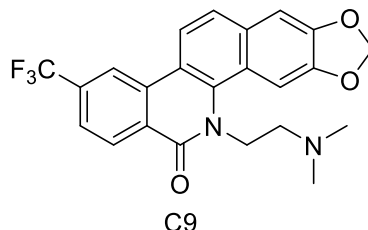

**12-(2-(Dimethylamino)ethyl)-3-(trifluoromethyl)-[1,3]dioxolo[4',5':4,5]benzo[1,2-c]phenanthridin-13(12H)-one (C9).** The compound **C9** was prepared from **7pe'**. White solid, yield 42%, mp = 157.4–158.5 °C. <sup>1</sup>H NMR (500 MHz, CDCl<sub>3</sub>)  $\delta$  8.78 (s, 1H), 8.31 (d,  $J$  = 8.5 Hz, 1H), 8.04 (d,  $J$  = 8.5 Hz, 1H), 7.94 (d,  $J$  = 8.5 Hz, 1H), 7.62 (s, 1H), 7.58 (d,  $J$  = 8.5 Hz, 1H), 7.17 (s, 1H), 6.12 (s, 2H), 4.66 (t,  $J$  = 6.0 Hz, 2H), 2.71 (t,  $J$  = 6.0 Hz, 2H), 2.14 (s, 6H). <sup>13</sup>C NMR (125 MHz, CDCl<sub>3</sub>)  $\delta$  164.4, 148.4, 147.8, 137.0, 136.9, 133.0, 129.7, 129.4, 128.9 (q,  $J$  = 3.3 Hz), 126.3 (q,  $J$  = 4.2 Hz), 125.6, 124.0, 122.9, 121.0, 118.6, 116.7, 105.0, 102.7, 101.9, 57.4, 50.4, 45.5. HRMS (ESI)  $m/z$ : 429.1379 [M + H]<sup>+</sup>, calcd for C<sub>23</sub>H<sub>20</sub>N<sub>2</sub>O<sub>3</sub>F<sub>3</sub> 429.1421.

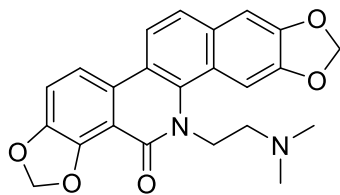

C10

**13-(2-(Dimethylamino)ethyl)-[1,3]dioxolo[4',5':4,5]benzo[1,2-c][1,3]dioxolo[4,5-**

**i]phenanthridin-14(13H)-one (C10).**<sup>5</sup> The compound **C10** was prepared from **7de'**. White solid, yield 45%, mp = 180.3–181.4 °C. <sup>1</sup>H NMR (400 MHz, CDCl<sub>3</sub>) δ 7.94 (d, *J* = 8.8 Hz, 1H), 7.72 (d, *J* = 8.4 Hz, 1H), 7.57 (s, 1H), 7.51 (d, *J* = 8.8 Hz, 1H), 7.22 (d, *J* = 8.4 Hz, 1H), 7.14 (s, 1H), 6.26 (s, 2H), 6.09 (s, 2H), 4.56 (t, *J* = 7.2 Hz, 2H), 2.76 (t, *J* = 7.2 Hz, 2H), 2.17 (s, 6H). <sup>13</sup>C NMR (125 MHz, CDCl<sub>3</sub>) δ 163.3, 148.0, 147.9, 147.7, 147.6, 135.1, 131.8, 129.0, 123.8, 121.4, 118.8, 118.3, 115.6, 113.4, 111.4, 104.9, 103.0, 102.5, 101.7, 57.5, 49.9, 45.7. HRMS (ESI) *m/z*: 405.1454 [M + H]<sup>+</sup>, calcd for C<sub>23</sub>H<sub>21</sub>N<sub>2</sub>O<sub>5</sub> 405.1445.

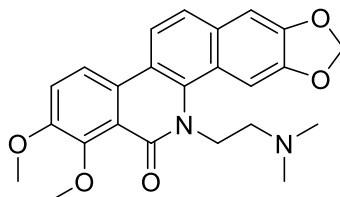

C11

**12-(2-(Dimethylamino)ethyl)-1,2-dimethoxy-[1,3]dioxolo[4',5':4,5]benzo[1,2-c]**

**phenanthridin-13(12H)-one (C11).**<sup>6</sup> The compound **C11** was prepared from **7ee'**. White solid, yield 35%, mp = 143.5–146.4 °C. <sup>1</sup>H NMR (400 MHz, CDCl<sub>3</sub>) δ 7.95 (d, *J* = 8.8 Hz, 1H), 7.92 (d, *J* = 8.8 Hz, 1H), 7.57 (s, 1H), 7.51 (d, *J* = 8.8 Hz, 1H), 7.36 (d, *J* = 8.8 Hz, 1H), 7.14 (s, 1H), 6.08 (s, 2H), 4.55 (t, *J* = 6.8 Hz, 2H), 4.06 (s, 3H), 3.97 (s, 3H), 2.70 (t, *J* = 6.8 Hz, 2H), 2.16 (s, 6H). <sup>13</sup>C NMR (100 MHz, CDCl<sub>3</sub>) δ 163.2, 152.7, 150.5, 147.7, 147.5, 135.1, 131.6, 129.1, 123.5, 121.3, 120.2, 118.5, 118.3, 118.01, 117.8, 104.8, 102.5, 101.6, 61.9, 57.7, 56.8, 49.9, 45.8. HRMS (ESI) *m/z*: 421.1777 [M + H]<sup>+</sup>, calcd for C<sub>24</sub>H<sub>25</sub>N<sub>2</sub>O<sub>5</sub> 421.1758.

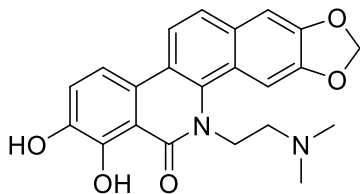

C12

**12-(2-(Dimethylamino)ethyl)-1,2-dihydroxy-[1,3]dioxolo[4',5':4,5]benzo[1,2-c]**

**phenanthridine-13(12H)-one (C12).**<sup>5</sup> The compound **C12** was prepared from **7qe'**. Yellow solid, yield 50%, mp = 225.8–226.9 °C. <sup>1</sup>H NMR (400 MHz, DMSO) δ 13.17 (s, 1H), 9.55 (s, 1H), 8.15 (d, *J* = 8.8 Hz, 1H), 7.75 (d, *J* = 8.8 Hz, 1H), 7.70 (s, 1H), 7.68 (d, *J* = 8.8 Hz, 1H), 7.42 (s, 1H), 7.30 (d, *J* = 8.8 Hz, 1H), 6.19 (s, 2H), 4.58 (t, *J* = 6.8 Hz, 2H), 2.59 (t, *J* = 6.8 Hz, 2H), 1.95 (s, 6H). <sup>13</sup>C NMR (100 MHz, DMSO) δ 168.9, 148.5, 147.4, 147.2, 144.3, 132.7, 131.1, 125.9, 124.3, 122.4, 120.4, 118.8, 118.3, 112.6, 110.3, 104.7, 101.8, 56.7, 49.0, 45.0. HRMS (ESI) *m/z*: 393.1456 [M + H]<sup>+</sup>, calcd for C<sub>22</sub>H<sub>21</sub>N<sub>2</sub>O<sub>5</sub> 393.1445.

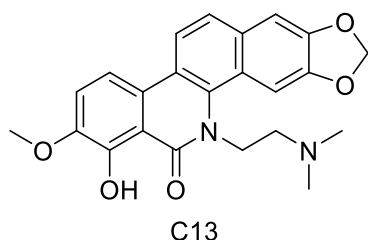

**12-(2-(Dimethylamino)ethyl)-1-hydroxy-2-methoxy-[1,3]dioxolo[4',5':4,5]benzo[1,2-c]**

**phenanthridin-13(12H)-one (C13).**<sup>5</sup> The compound **C13** was prepared from **7re'**. White solid, yield 21%, mp = 142.4–143.1 °C. <sup>1</sup>H NMR (400 MHz, CDCl<sub>3</sub>) δ 13.41 (s, 1H), 7.97 (d, *J* = 8.8 Hz, 1H), 7.62 (d, *J* = 8.8 Hz, 1H), 7.57 (s, 1H), 7.55 (d, *J* = 8.8 Hz, 1H), 7.32 (d, *J* = 8.8 Hz, 1H), 7.16 (s, 1H), 6.09 (s, 2H), 4.63 (t, *J* = 6.8 Hz, 2H), 4.00 (s, 3H), 2.67 (t, *J* = 6.8 Hz, 2H), 2.12 (s, 6H). <sup>13</sup>C NMR (100 MHz, CDCl<sub>3</sub>) δ 169.9, 151.4, 147.7, 147.6, 146.8, 133.8, 131.7, 127.6, 124.4, 121.2, 118.7, 118.6, 117.9, 111.7, 111.1, 105.0, 102.3, 101.7, 57.6, 56.6, 50.0, 45.7. HRMS (ESI) *m/z*: 407.1604 [M + H]<sup>+</sup>, calcd for C<sub>23</sub>H<sub>23</sub>N<sub>2</sub>O<sub>5</sub> 407.1601.

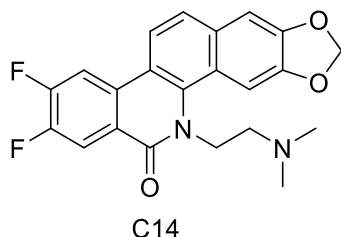

**12-(2-(Dimethylamino)ethyl)-2,3-difluoro-[1,3]dioxolo[4',5':4,5]benzo[1,2-c]phenanthridin-13(12H)-one (C14).** The compound **C14** was prepared from **7fe'**. White solid, yield 25%, mp = 159.1–161.9 °C. <sup>1</sup>H NMR (400 MHz, CDCl<sub>3</sub>) δ 8.26 (dd, *J* = 10.8, 8.4 Hz, 1H), 7.95 (dd, *J* = 11.6, 7.2 Hz, 1H), 7.86 (d, *J* = 8.8 Hz, 1H), 7.64 (s, 1H), 7.57 (d, *J* = 8.8 Hz, 1H), 7.18 (s, 1H), 6.12 (s, 2H), 4.63 (t, *J* = 6.8 Hz 2H), 2.68 (t, *J* = 6.8 Hz, 2H), 2.12 (s, 6H). <sup>13</sup>C NMR (100 MHz, CDCl<sub>3</sub>) δ

163.8, 154.2 (dd,  $J = 255.2, 14.3$  Hz), 150.3 (dd,  $J = 251.7, 13.8$  Hz), 148.2, 147.8, 136.4, 132.6, 132.3 (dd,  $J = 7.9, 2.7$  Hz), 124.0, 123.0 (dd,  $J = 5.5, 1.7$  Hz), 121.2, 118.5, 117.1 (dd,  $J = 18.7, 1.7$  Hz), 110.7, 110.5, 105.0, 102.6, 101.9, 57.6, 50.6, 45.7. HRMS (ESI)  $m/z$ : 397.1331  $[M + H]^+$ , calcd for  $C_{22}H_{19}N_2O_3F_2$  397.1358.

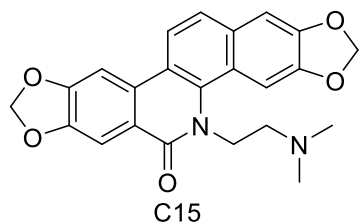

**5-(2-(Dimethylamino)ethyl)-[1,3]dioxolo[4',5':4,5]benzo[1,2-c][1,3]dioxolo[4,5-j]**

**phenanthridine-6(5H)-one (C15).**<sup>5</sup> The compound **C15** was prepared from **4de'**. White solid, yield 71%, mp = 183.5–184.2 °C.  $^1H$  NMR (400 MHz,  $CDCl_3$ )  $\delta$  7.88–7.77 (m, 2H), 7.60 (s, 1H), 7.53 (s, 1H), 7.48 (d,  $J = 7.6$  Hz, 1H), 7.12 (s, 1H), 6.10 (s, 2H), 6.08 (s, 2H), 4.59 (t,  $J = 6.8$  Hz, 2H), 2.72 (t,  $J = 6.8$  Hz, 2H), 2.16 (s, 6H).  $^{13}C$  NMR (100 MHz,  $CDCl_3$ )  $\delta$  164.6, 152.5, 148.2, 147.7, 147.5, 135.4, 131.9, 131.2, 123.5, 121.3, 121.0, 118.6, 117.6, 106.8, 104.9, 102.7, 102.1, 101.7, 100.8, 57.8, 50.4, 45.8. HRMS (ESI)  $m/z$ : 405.1442  $[M + H]^+$ , calcd for  $C_{23}H_{21}N_2O_5$  405.1445.

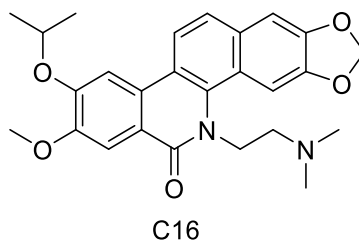

**12-(2-(Dimethylamino)ethyl)-2-methoxy-3-isopropoxy-[1,3]dioxolo[4',5':4,5]benzo[1,2-c]**

**phenanthridin-13(12H)-one (C16).** The compound **C16** was prepared from **7te'**. White solid, yield 45%, mp = 137.1–137.9 °C.  $^1H$  NMR (400 MHz,  $CDCl_3$ )  $\delta$  7.93 (d,  $J = 8.8$  Hz, 1H), 7.90 (s, 1H), 7.65 (s, 1H), 7.60 (s, 1H), 7.54 (d,  $J = 8.8$  Hz, 1H), 7.17 (s, 1H), 6.09 (s, 2H), 4.87–4.81 (m, 1H), 4.64 (t,  $J = 6.8$  Hz, 2H), 4.02 (s, 3H), 2.75 (t,  $J = 6.8$  Hz, 2H), 2.20 (s, 6H), 1.50 (d,  $J = 6.8$  Hz, 6H).  $^{13}C$  NMR (100 MHz,  $CDCl_3$ )  $\delta$  164.9, 152.2, 150.9, 147.6, 147.5, 135.4, 131.8, 128.9, 123.5, 121.3, 119.6, 118.5, 117.7, 109.4, 106.4, 104.9, 102.7, 101.7, 71.7, 57.9, 56.3, 50.3, 45.8, 22.1. HRMS (ESI)  $m/z$ : 449.2050  $[M + H]^+$ , calcd for  $C_{26}H_{29}N_2O_5$  449.2071.



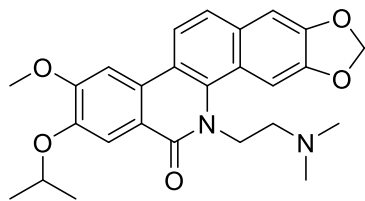

C17

**12-(2-(Dimethylamino)ethyl)-2-isopropoxy-3-methoxy-[1,3]dioxolo[4',5':4,5]benzo[1,2-c]phenanthridin-13(12H)-one (C17).** The compound **C17** was prepared from **7ue'**. White solid, yield 60%, mp = 154.7–155.2 °C. <sup>1</sup>H NMR (500 MHz, CDCl<sub>3</sub>) δ 7.96 (d, *J* = 8.5 Hz, 1H), 7.91 (s, 1H), 7.66 (s, 1H), 7.58–7.52 (m, 2H), 7.16 (s, 1H), 6.09 (s, 2H), 4.86–4.78 (m, 1H), 4.62 (t, *J* = 6.8 Hz, 2H), 4.05 (s, 3H), 2.78 (t, *J* = 6.8 Hz, 2H), 2.18 (s, 6H), 1.46 (d, *J* = 5.0 Hz, 6H). <sup>13</sup>C NMR (125 MHz, CDCl<sub>3</sub>) δ 164.9, 154.6, 148.1, 147.6, 147.5, 135.4, 131.7, 128.7, 123.4, 121.2, 119.6, 118.5, 117.6, 111.5, 104.9, 103.4, 102.7, 101.7, 71.3, 57.9, 56.3, 50.4, 45.8, 22.1. HRMS (ESI) *m/z*: 449.2028 [M + H]<sup>+</sup>, calcd for C<sub>26</sub>H<sub>29</sub>N<sub>2</sub>O<sub>5</sub> 449.2071.

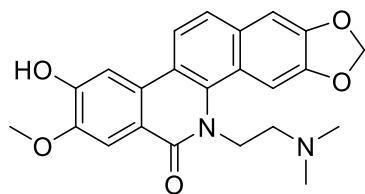

C18

**12-(2-(Dimethylamino)ethyl)-2-hydroxy-3-methoxy-[1,3]dioxolo[4',5':4,5]benzo[1,2-c]phenanthridin-13(12H)-one (C18).**<sup>5</sup> The compound **C18** was prepared from **4gd'**. White solid, yield 69%, mp = 243.9–246.3 °C. <sup>1</sup>H NMR (400 MHz, CDCl<sub>3</sub>) δ 7.90 (d, *J* = 8.8 Hz, 1H), 7.87 (s, 1H), 7.65 (s, 1H), 7.58 (s, 1H), 7.53 (d, *J* = 8.8 Hz, 1H), 7.15 (s, 1H), 6.07 (s, 2H), 4.70 (t, *J* = 6.8 Hz, 2H), 4.03 (s, 3H), 2.80 (t, *J* = 6.8 Hz, 2H), 2.24 (s, 6H). <sup>13</sup>C NMR (100 MHz, DMSO) δ 163.5, 151.9, 148.6, 147.1, 147.0, 134.7, 131.3, 128.8, 123.2, 120.3, 118.6, 117.7, 116.7, 108.8, 107.4, 104.6, 101.9, 101.7, 57.2, 55.6, 49.1, 45.1. HRMS (ESI) *m/z*: 407.1591 [M + H]<sup>+</sup>, calcd for C<sub>23</sub>H<sub>23</sub>N<sub>2</sub>O<sub>5</sub> 407.1601.

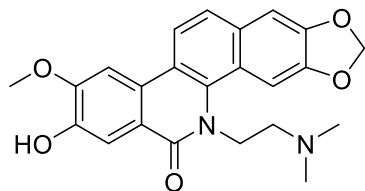

C19

**12-(2-(Dimethylamino)ethyl)-2-methoxy-3-hydroxy-[1,3]dioxolo[4',5':4,5]benzo[1,2-c]phenanthridin-13(12H)-one (C19).**<sup>5</sup> The compound **C19** was prepared from **4fd'**. White solid, yield 70%, mp = 210.2–213.5 °C. <sup>1</sup>H NMR (400 MHz, DMSO) δ 9.82 (s, 1H), 8.26 (d, *J* = 8.8 Hz, 1H), 7.80 (s, 1H), 7.69 (s, 1H), 7.67–7.61 (m, 2H), 7.40 (s, 1H), 6.18 (s, 2H), 4.50 (t, *J* = 6.8 Hz, 2H), 4.02 (s, 3H), 2.57 (t, *J* = 6.8 Hz, 2H), 1.97 (s, 6H). <sup>13</sup>C NMR (100 MHz, DMSO) δ 163.4, 152.9, 147.4, 147.0, 146.9, 134.3, 131.1, 127.4, 123.0, 120.3, 119.1, 119.0, 117.2, 112.2, 104.6, 104.3, 101.9, 101.6, 57.1, 56.0, 49.1, 45.1. HRMS (ESI) *m/z*: 407.1591 [M + H]<sup>+</sup>, calcd for C<sub>23</sub>H<sub>23</sub>N<sub>2</sub>O<sub>5</sub> 407.1601.

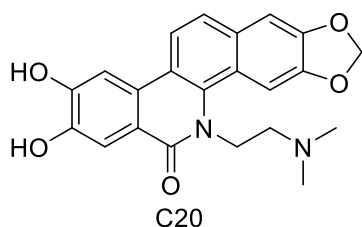

**12-(2-(Dimethylamino)ethyl)-2,3-dihydroxy-[1,3]dioxolo[4',5':4,5]benzo[1,2-c]phenanthridin-13(12H)-one (C20).**<sup>5</sup> The compound **C20** was prepared from **4hd'**. White solid, yield 15%, mp = 173.6–175.9 °C. <sup>1</sup>H NMR (400 MHz, DMSO) δ 7.97 (d, *J* = 8.8 Hz, 1H), 7.70 (s, 1H), 7.64 (s, 2H), 7.62 (d, *J* = 8.8 Hz, 1H), 7.39 (s, 1H), 6.18 (s, 2H), 4.48 (t, *J* = 6.8 Hz, 2H), 2.55 (t, *J* = 6.8 Hz, 2H), 1.97 (s, 6H). <sup>13</sup>C NMR (100 MHz, DMSO) δ 163.5, 151.4, 147.1, 147.0, 146.7, 134.3, 131.1, 127.6, 123.2, 120.4, 118.6, 118.0, 117.1, 112.7, 107.6, 104.6, 101.9, 101.6, 57.3, 49.1, 45.2. HRMS (ESI) *m/z*: 393.1464 [M + H]<sup>+</sup>, calcd for C<sub>22</sub>H<sub>21</sub>N<sub>2</sub>O<sub>5</sub> 393.1445.

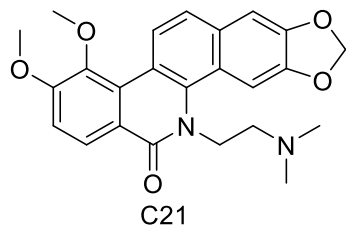

**12-(2-(Dimethylamino)ethyl)-3,4-dimethoxy-[1,3]dioxolo[4',5':4,5]benzo[1,2-c]phenanthridin-13(12H)-one (C21).**<sup>6</sup> The compound **C21** was prepared from **7ge'**. White solid, yield 25%, mp = 120.8 °C–121.4 °C. <sup>1</sup>H NMR (400 MHz, CDCl<sub>3</sub>) δ 9.04 (d, *J* = 8.8 Hz, 1H), 8.34 (d, *J* = 8.8 Hz, 1H), 7.53 (d, *J* = 8.8 Hz, 1H), 7.50 (s, 1H), 7.18 (d, *J* = 8.8 Hz, 1H), 7.16 (s, 1H), 6.08 (s, 2H), 4.62 (t, *J* = 6.8 Hz, 2H), 4.02 (s, 3H), 3.90 (s, 3H), 2.54 (t, *J* = 6.8 Hz, 2H), 2.08 (s, 6H). <sup>13</sup>C NMR (100 MHz, CDCl<sub>3</sub>) δ 165.2, 157.0, 148.0, 147.2, 145.6, 136.2, 132.0, 128.1, 126.0,

123.3, 122.7, 121.1, 120.8, 118.2, 112.2, 104.4, 102.8, 101.6, 60.4, 57.5, 56.3, 50.6, 45.7. HRMS (ESI)  $m/z$ : 421.1759  $[M + H]^+$ , calcd for  $C_{24}H_{25}N_2O_5$  421.1758.

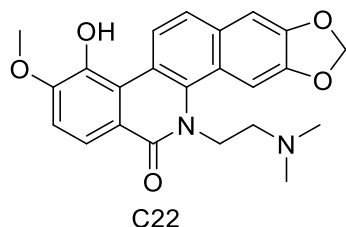

**12-(2-(Dimethylamino)ethyl)-3-methoxy-4-hydroxy-[1,3]dioxolo[4',5':4,5]benzo[1,2-c]**

**phenanthridin-13(12H)-one (C22).**<sup>6</sup> The compound **C22** was prepared from **7ve'**. White solid, yield 40%, mp = 187.3–189.7 °C. <sup>1</sup>H NMR (400 MHz, CDCl<sub>3</sub>) δ 9.11 (d,  $J$  = 8.8 Hz, 1H), 8.14 (d,  $J$  = 8.8 Hz, 1H), 7.53 (d,  $J$  = 8.8 Hz, 1H), 7.48 (s, 1H), 7.15 (s, 1H), 7.12 (d,  $J$  = 8.8 Hz, 1H), 6.86 (s, 1H), 6.07 (s, 2H), 4.65 (t,  $J$  = 6.8 Hz, 2H), 4.04 (s, 3H), 2.56 (t,  $J$  = 6.8 Hz, 2H), 2.10 (s, 6H). <sup>13</sup>C NMR (100 MHz, CDCl<sub>3</sub>) δ 165.3, 149.6, 147.8, 147.1, 142.4, 135.5, 131.6, 123.5, 123.0, 121.4, 121.1, 121.0, 120.9, 118.8, 110.2, 104.4, 102.5, 101.5, 57.3, 56.7, 50.4, 45.6. HRMS (ESI)  $m/z$ : 405.1607  $[M + H]^+$ , calcd for  $C_{23}H_{23}N_2O_5$  407.1601.

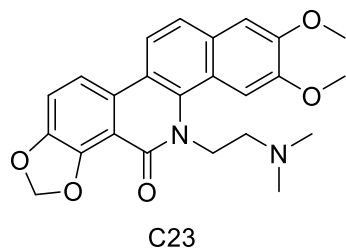

**12-(2-(Dimethylamino)ethyl)-9,10-dimethoxybenzo[c][1,3]dioxolo[4,5-i]phenanthridin-**

**13(12H)-one (C23).**<sup>5</sup> The compound **C23** was prepared from **7df'**. White solid, yield 45%, mp = 183.3–181.4 °C. <sup>1</sup>H NMR (400 MHz, CDCl<sub>3</sub>) δ 7.96 (d,  $J$  = 8.8 Hz, 1H), 7.73 (d,  $J$  = 8.8 Hz, 1H), 7.55 (d,  $J$  = 8.8 Hz, 1H), 7.51 (s, 1H), 7.23 (d,  $J$  = 8.8 Hz, 1H), 7.15 (s, 1H), 6.26 (s, 2H), 4.62 (t,  $J$  = 6.8 Hz, 2H), 4.08 (s, 3H), 4.03 (s, 3H), 2.79 (t,  $J$  = 6.8 Hz, 2H), 2.14 (s, 6H). <sup>13</sup>C NMR (100 MHz, CDCl<sub>3</sub>) δ 163.3, 149.6, 148.8, 147.9, 147.8, 134.4, 130.6, 129.2, 123.2, 120.1, 118.7, 117.8, 115.5, 113.4, 111.3, 107.3, 105.1, 103.0, 57.8, 56.2, 56.1, 49.9, 45.8. HRMS (ESI)  $m/z$ : 421.1776  $[M + H]^+$ , calcd for  $C_{24}H_{25}N_2O_5$  421.1758.

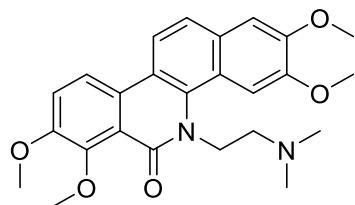

C24

**5-(2-(Dimethylamino)ethyl)-2,3,7,8-tetramethoxybenzo[c]phenanthridin-6(5H)-one (C24).<sup>6</sup>**

The compound **C24** was prepared from **7ef**. White solid, yield 40%, mp = 173.5–175.9 °C. <sup>1</sup>H NMR (400 MHz, CDCl<sub>3</sub>) δ 7.97 (d, *J* = 8.8 Hz, 1H), 7.94 (d, *J* = 8.8 Hz, 1H), 7.55 (d, *J* = 8.8 Hz, 1H), 7.51 (s, 1H), 7.37 (d, *J* = 8.8 Hz, 1H), 7.15 (s, 1H), 4.61 (t, *J* = 6.8 Hz, 2H), 4.09 (s, 3H), 4.07 (s, 3H), 4.03 (s, 3H), 3.98 (s, 3H), 2.76 (t, *J* = 6.8 Hz, 2H), 2.12 (s, 6H). <sup>13</sup>C NMR (100 MHz, CDCl<sub>3</sub>) δ 163.2, 152.7, 150.6, 149.6, 148.9, 134.4, 130.5, 129.4, 123.0, 120.1, 120.0, 118.4, 118.2, 117.8, 117.8, 107.3, 105.2, 61.9, 57.8, 56.8, 56.3, 56.0, 49.7, 45.6. HRMS (ESI) *m/z*: 437.2096 [*M* + H]<sup>+</sup>, calcd for C<sub>25</sub>H<sub>29</sub>N<sub>2</sub>O<sub>5</sub> 437.2071.

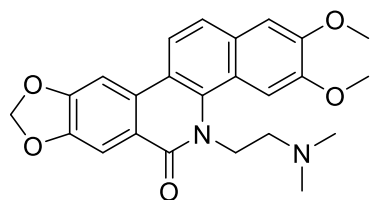

C25

**5-(2-(Dimethylamino)ethyl)-2,3-dimethoxybenzo[c][1,3]dioxolo[4,5-j]phenanthridin-6(5H)-one (C25).<sup>5</sup>**

The compound **C25** was prepared from **4de**. White solid, yield 80%, mp = 195.6–197.2 °C. <sup>1</sup>H NMR (400 MHz, CDCl<sub>3</sub>) δ 7.90 (d, *J* = 8.8 Hz, 1H), 7.86 (s, 1H), 7.60–7.53 (m, 3H), 7.17 (s, 1H), 6.12 (s, 2H), 4.70 (t, *J* = 6.8 Hz, 2H), 4.10 (s, 3H), 4.04 (s, 3H), 2.81 (t, *J* = 6.8 Hz, 2H), 2.17 (s, 6H). <sup>13</sup>C NMR (100 MHz, CDCl<sub>3</sub>) δ 164.6, 152.6, 149.6, 148.7, 148.2, 134.7, 131.5, 130.7, 123.0, 121.1, 119.8, 118.5, 117.2, 107.34, 106.8, 105.2, 102.1, 100.8, 57.9, 56.3, 56.1, 50.1, 45.7. HRMS (ESI) *m/z*: 421.1745 [*M* + H]<sup>+</sup>, calcd for C<sub>24</sub>H<sub>25</sub>N<sub>2</sub>O<sub>5</sub> 421.1758.

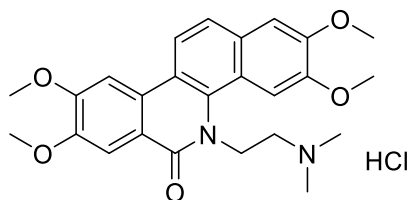

C26

**5-(2-(Dimethylamino)ethyl)-2,3,8,9-tetramethoxybenzo[c]phenanthridin-6(5H)-one (C26).**<sup>5</sup>

The compound **C26** was prepared from **4ee'** as a hydrochloric acid salt. White solid, yield 80%, mp = 195.5–197.8 °C. <sup>1</sup>H NMR (400 MHz, D<sub>2</sub>O) δ 6.91 (d, *J* = 8.8 Hz, 1H), 6.78 (s, 1H), 6.74 (d, *J* = 8.8 Hz, 1H), 6.41 (s, 1H), 6.34 (s, 1H), 5.75 (s, 1H), 3.86 (t, *J* = 6.8 Hz, 2H), 3.70 (s, 3H), 3.67 (s, 3H), 3.66 (s, 3H), 3.61 (s, 3H), 3.32 (t, *J* = 6.8 Hz, 2H), 2.88 (s, 6H). <sup>13</sup>C NMR (100 MHz, D<sub>2</sub>O) δ 164.5, 152.7, 148.2, 147.6, 147.1, 130.5, 129.4, 128.6, 123.1, 117.2, 116.4, 115.5, 115.2, 106.9, 105.9, 102.4, 101.8, 57.9, 55.6, 55.5, 55.1, 55.1, 47.0, 43.5. HRMS (ESI) *m/z*: 437.2064 [M + H]<sup>+</sup>, calcd for C<sub>25</sub>H<sub>29</sub>N<sub>2</sub>O<sub>5</sub> 437.2071.

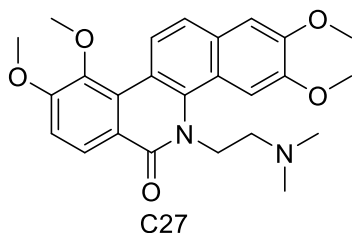

**5-(2-(Dimethylamino)ethyl)-2,3,9,10-tetramethoxybenzo[c]phenanthridin-6(5H)-one (C27).**<sup>6</sup>

The compound **C27** was prepared from **7gf'**. White solid, yield 15%, mp = 126.6–127.5 °C. <sup>1</sup>H NMR (400 MHz, CDCl<sub>3</sub>) δ 9.05 (d, *J* = 8.8 Hz, 1H), 8.34 (d, *J* = 8.8 Hz, 1H), 7.57 (d, *J* = 8.8 Hz, 1H), 7.42 (s, 1H), 7.19 (d, *J* = 8.8 Hz, 1H), 7.16 (s, 1H), 4.72 (t, *J* = 6.8 Hz, 2H), 4.06 (s, 3H), 4.04 (s, 3H), 4.02 (s, 3H), 3.91 (s, 3H), 2.59 (t, *J* = 6.8 Hz, 2H), 2.09 (s, 6H). <sup>13</sup>C NMR (100 MHz, CDCl<sub>3</sub>) δ 165.2, 157.0, 145.0, 148.5, 145.6, 135.3, 130.8, 128.3, 126.0, 122.7, 122.6, 120.7, 119.9, 117.8, 112.1, 106.8, 105.3, 60.4, 57.4, 56.3, 56.2, 56.1, 50.0, 45.4. HRMS (ESI) *m/z*: 437.2087 [M + H]<sup>+</sup>, calcd for C<sub>25</sub>H<sub>29</sub>N<sub>2</sub>O<sub>5</sub> 437.2071.

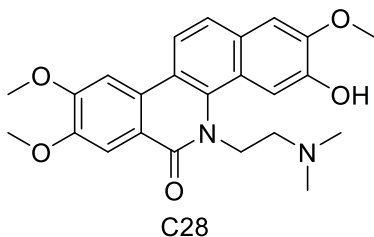

**5-(2-(Dimethylamino)ethyl)-3-hydroxy-2,8,9-trimethoxybenzo[c]phenanthridin-6(5H)-one (C28).**<sup>5</sup>

The compound **C28** was prepared from **4ef'**. White solid, yield 85%, mp = 220.0–223.1 °C. <sup>1</sup>H NMR (400 MHz, DMSO) δ 9.69 (s, 1H), 8.22 (d, *J* = 8.8 Hz, 1H), 7.82 (s, 1H), 7.71 (s, 1H), 7.66 (d, *J* = 8.8 Hz, 1H), 7.59 (s, 1H), 7.41 (s, 1H), 4.62 (t, *J* = 6.8 Hz, 2H), 4.02 (s, 3H), 3.94 (s, 3H), 3.91 (s, 3H), 2.47 (t, *J* = 6.8 Hz, 2H), 1.93 (s, 6H). <sup>13</sup>C NMR (100 MHz, DMSO) δ 163.5, 153.5, 149.1, 148.8, 146.2, 133.4, 129.6, 128.9, 122.8, 119.6, 118.5, 118.1, 116.3, 108.2, 108.1,

107.7, 103.9, 56.8, 56.1, 55.6, 55.5, 48.4, 45.1. HRMS (ESI)  $m/z$ : 423.1916  $[M + H]^+$ , calcd for  $C_{24}H_{27}N_2O_5$  423.1914.

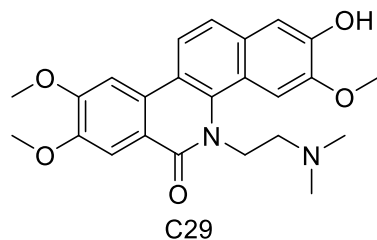

**5-(2-(Dimethylamino)ethyl)-2-hydroxy-3,8,9-trimethoxybenzo[c]phenanthridin-6(5H)-one (C29).**<sup>5</sup> The compound **C29** was prepared from **4eg'**. White solid, yield 80%, mp = 222.6–224.5 °C. <sup>1</sup>H NMR (400 MHz, DMSO)  $\delta$  9.79 (s, 1H), 8.23 (d,  $J$  = 8.8 Hz, 1H), 7.82 (s, 1H), 7.71 (s, 1H), 7.58 (d,  $J$  = 8.8 Hz, 1H), 7.56 (s, 1H), 7.24 (s, 1H), 4.59 (t,  $J$  = 6.8 Hz, 2H), 4.02 (s, 3H), 4.01 (s, 3H), 3.91 (s, 3H), 2.69 (t,  $J$  = 6.8 Hz, 2H), 1.99 (s, 6H). <sup>13</sup>C NMR (100 MHz, DMSO)  $\delta$  163.4, 153.5, 149.1, 148.0, 147.2, 134.2, 130.6, 129.0, 122.1, 118.8, 118.5, 118.2, 115.6, 110.8, 108.1, 105.3, 103.8, 57.3, 56.1, 55.7, 55.6, 49.3, 45.2. HRMS (ESI)  $m/z$ : 423.1918  $[M + H]^+$ , calcd for  $C_{24}H_{27}N_2O_5$  423.1914.

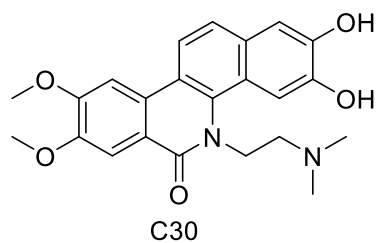

**5-(2-(Dimethylamino)ethyl)-2,3-dihydroxy-8,9-dimethoxybenzo[c]phenanthridin-6(5H)-one (C30).**<sup>5</sup> The compound **C30** was prepared from **4eh'**. White solid, yield 50%, mp = 159.6–162.8 °C. <sup>1</sup>H NMR (400 MHz, DMSO)  $\delta$  9.79 (s, 2H), 8.15 (d,  $J$  = 8.8 Hz, 1H), 7.80 (s, 1H), 7.71 (s, 1H), 7.55 (d,  $J$  = 8.8 Hz, 1H), 7.53 (s, 1H), 7.21 (s, 1H), 4.63 (t,  $J$  = 6.8 Hz, 2H), 4.02 (s, 3H), 3.91 (s, 3H), 2.55 (t,  $J$  = 6.8 Hz, 2H), 1.99 (s, 6H). <sup>13</sup>C NMR (100 MHz, DMSO)  $\delta$  163.5, 153.5, 149.0, 146.9, 146.0, 133.5, 129.9, 129.1, 122.3, 119.1, 118.3, 117.8, 115.7, 110.8, 108.3, 108.2, 103.8, 56.7, 56.1, 55.6, 48.4, 45.0. HRMS (ESI)  $m/z$ : 409.1738  $[M + H]^+$ , calcd for  $C_{23}H_{25}N_2O_5$  409.1758.



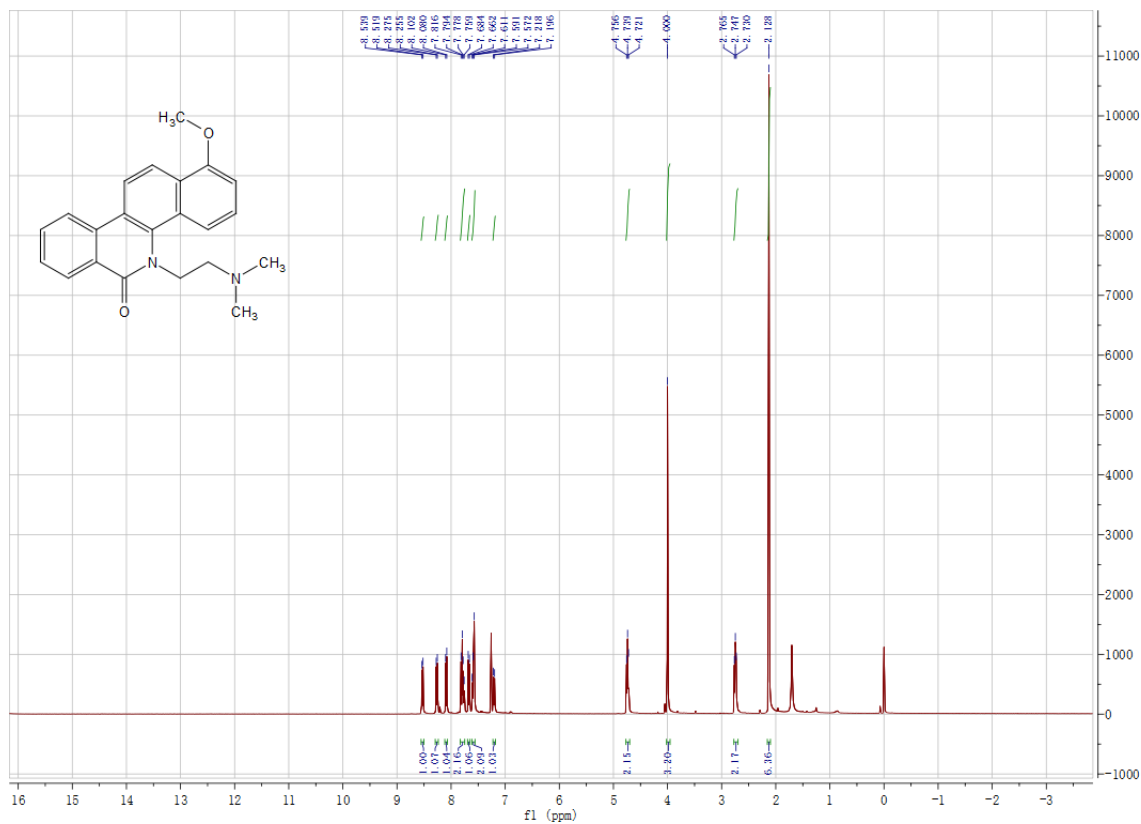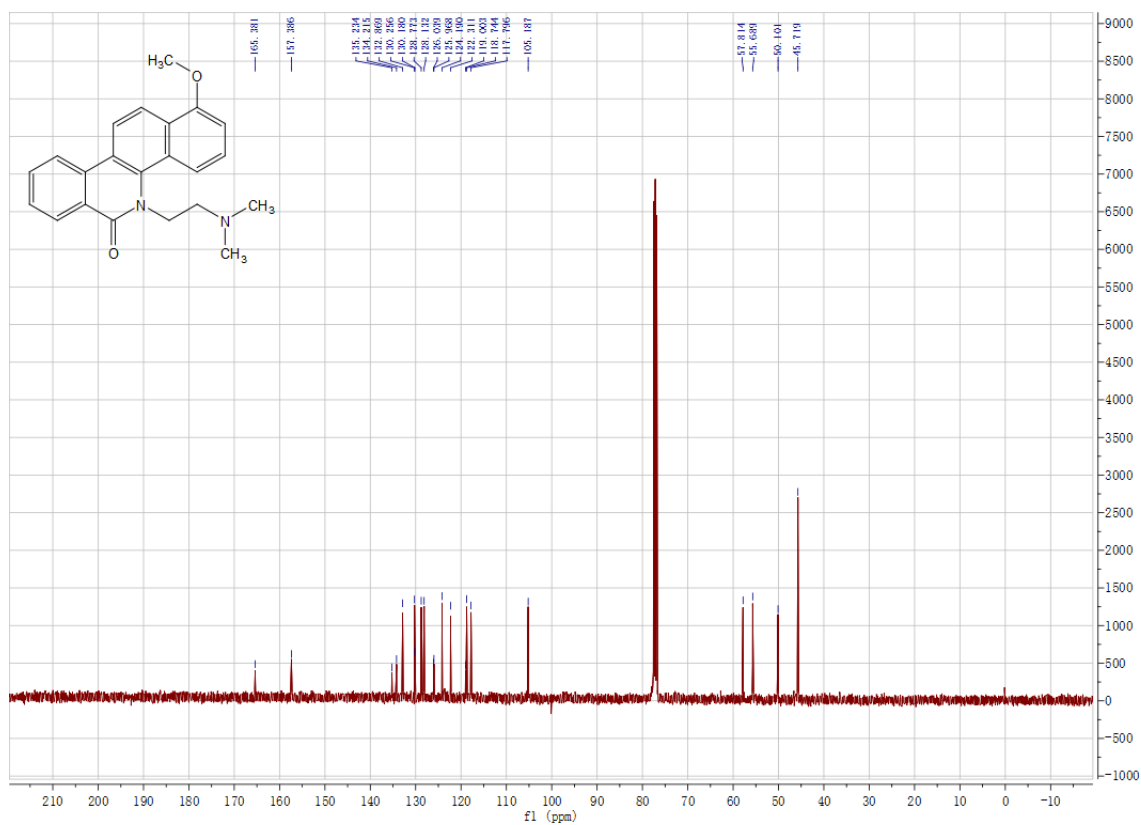

<sup>1</sup>H NMR and <sup>13</sup>C NMR spectra of compound A2





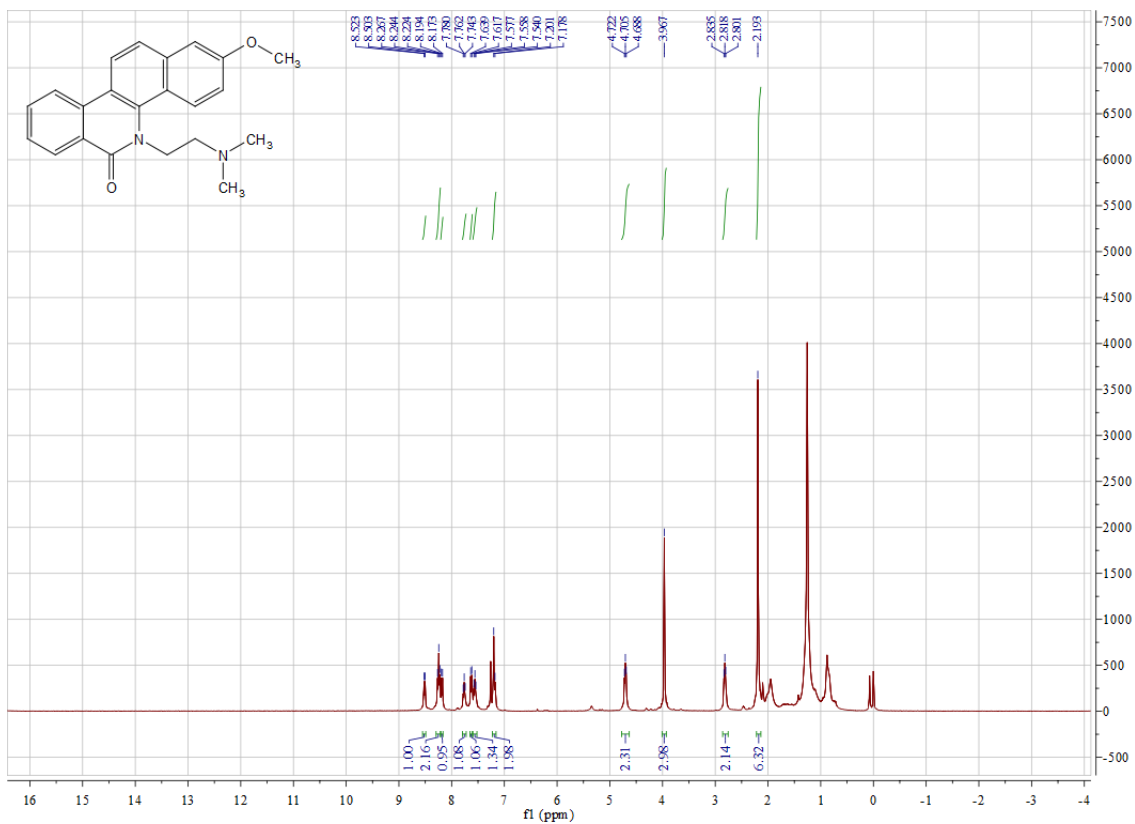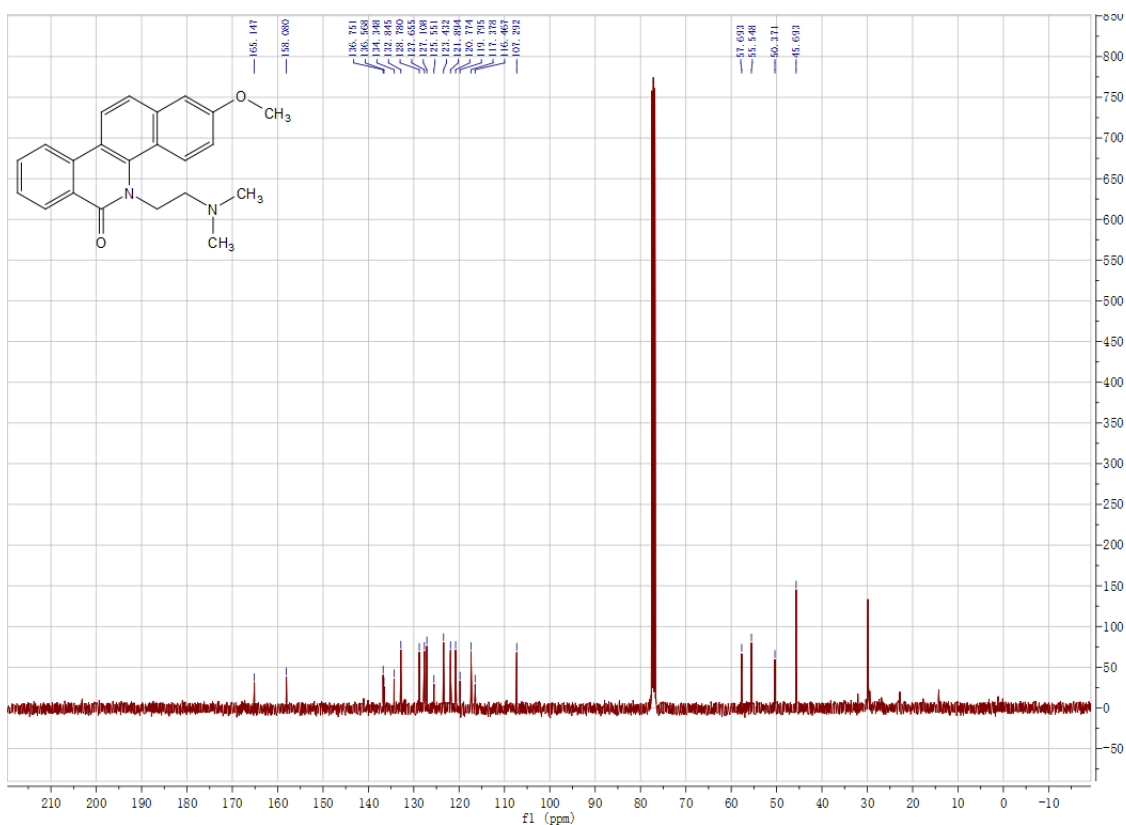

<sup>1</sup>H NMR and <sup>13</sup>C NMR spectra of compound A4





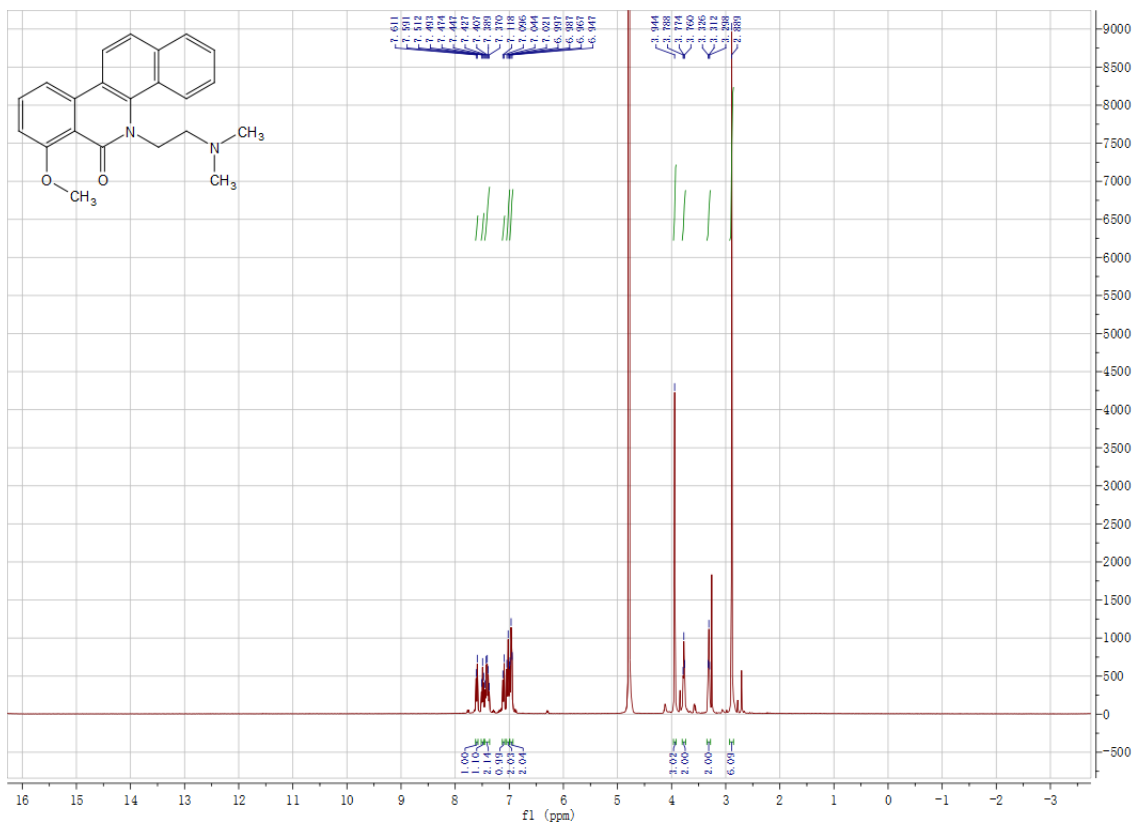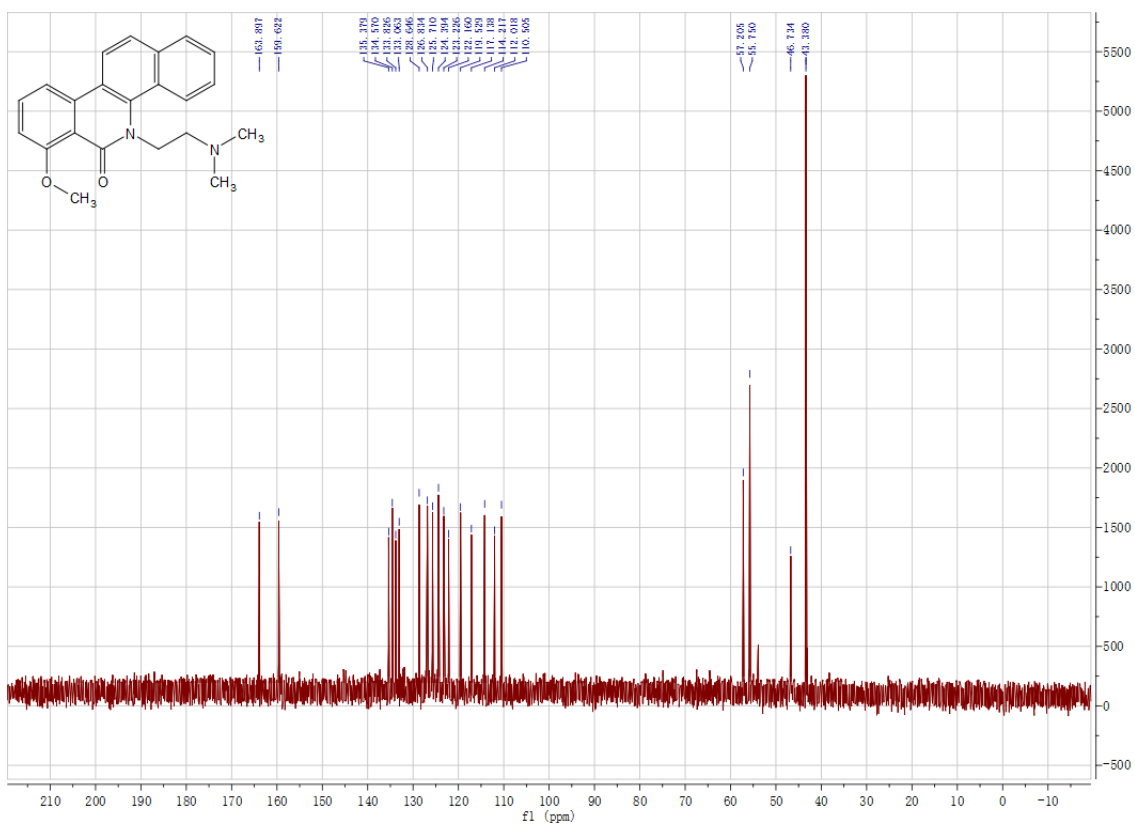

**<sup>1</sup>H NMR and <sup>13</sup>C NMR spectra of compound A7**

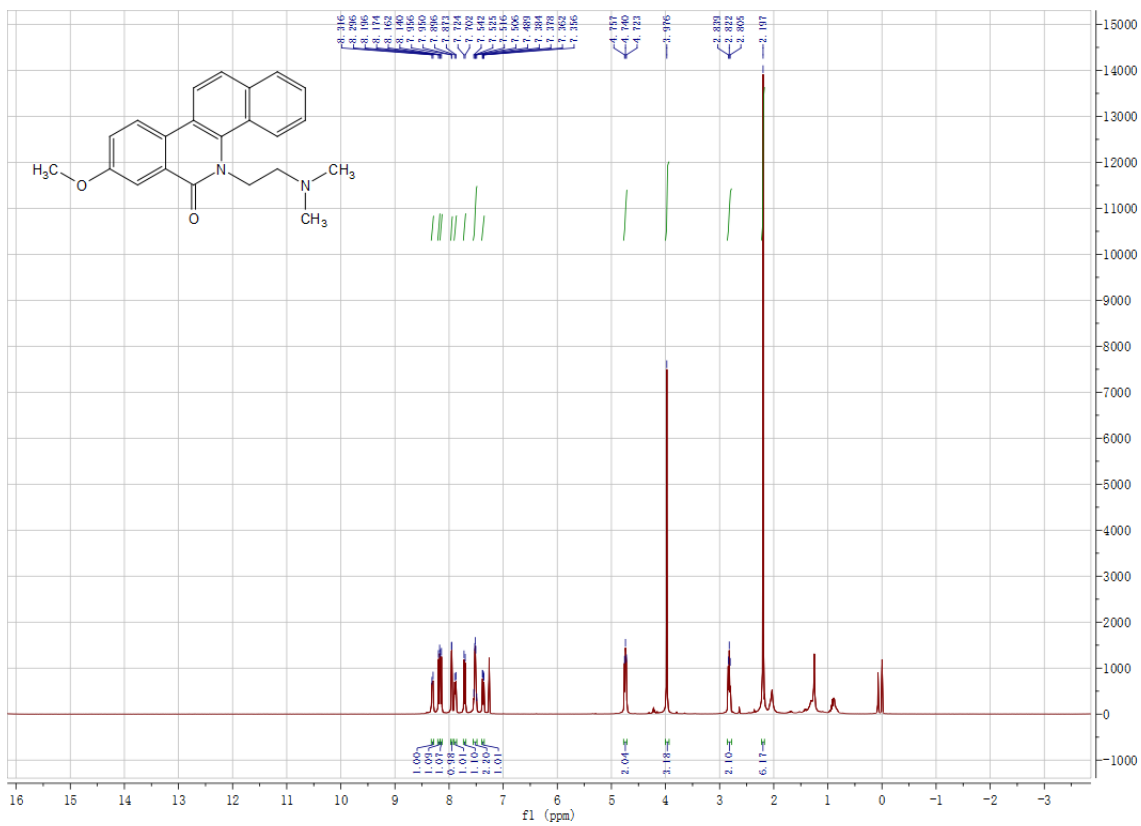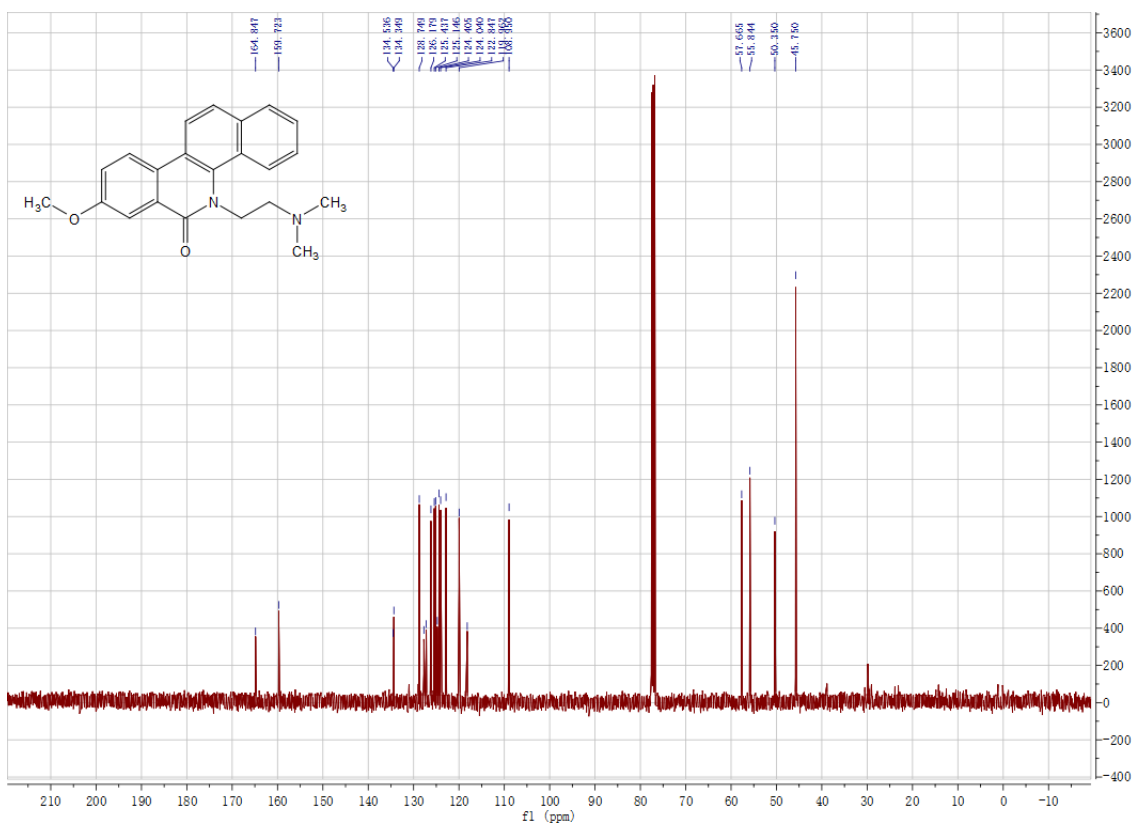

<sup>1</sup>H NMR and <sup>13</sup>C NMR spectra of compound A8

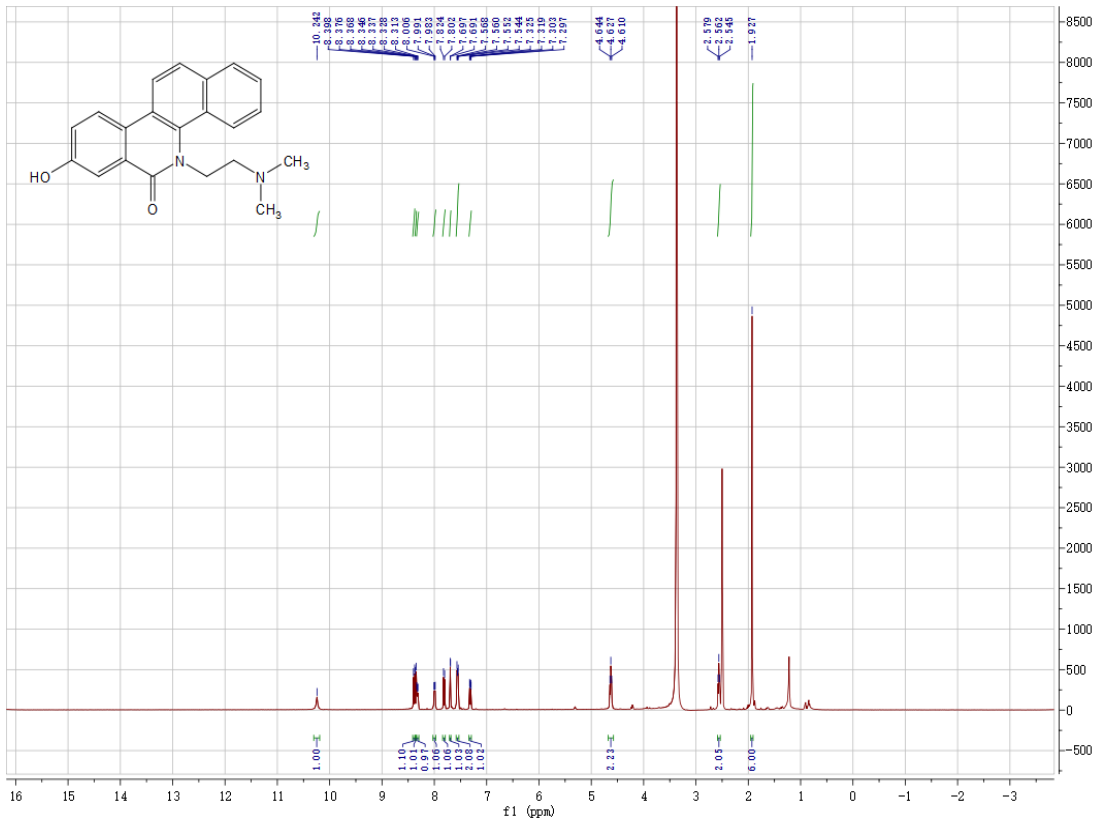

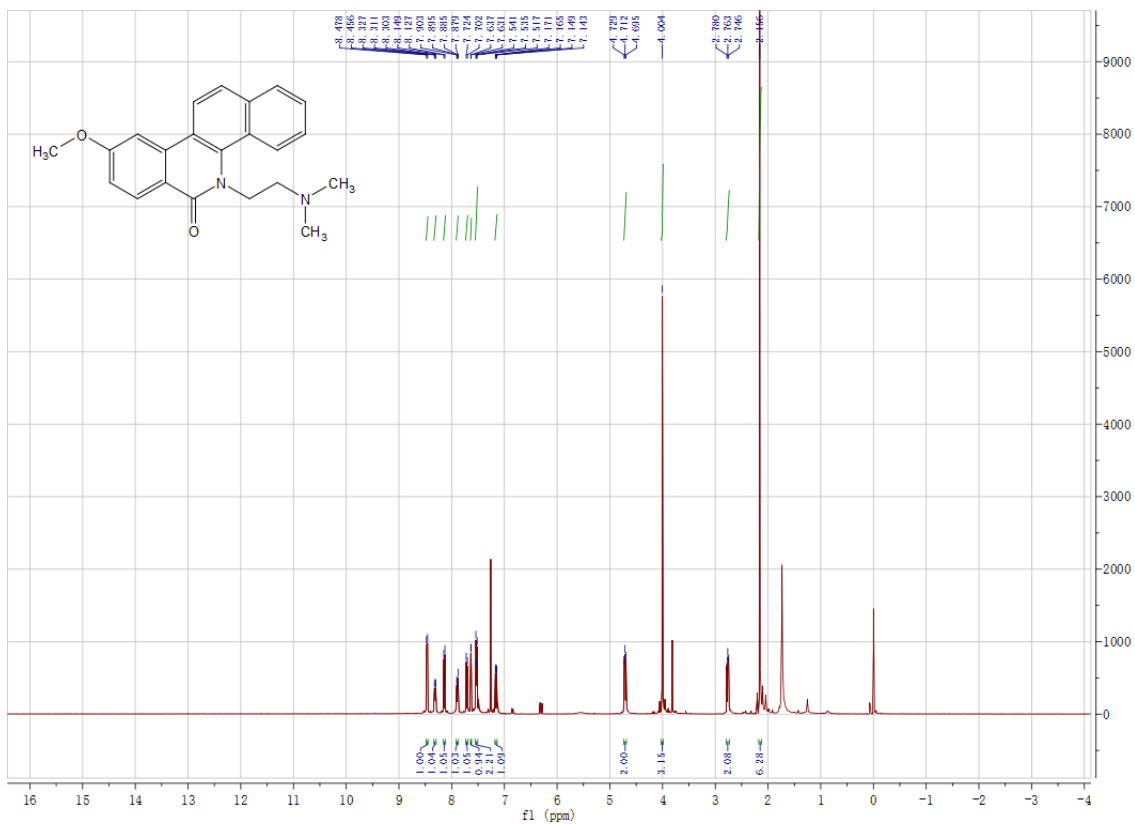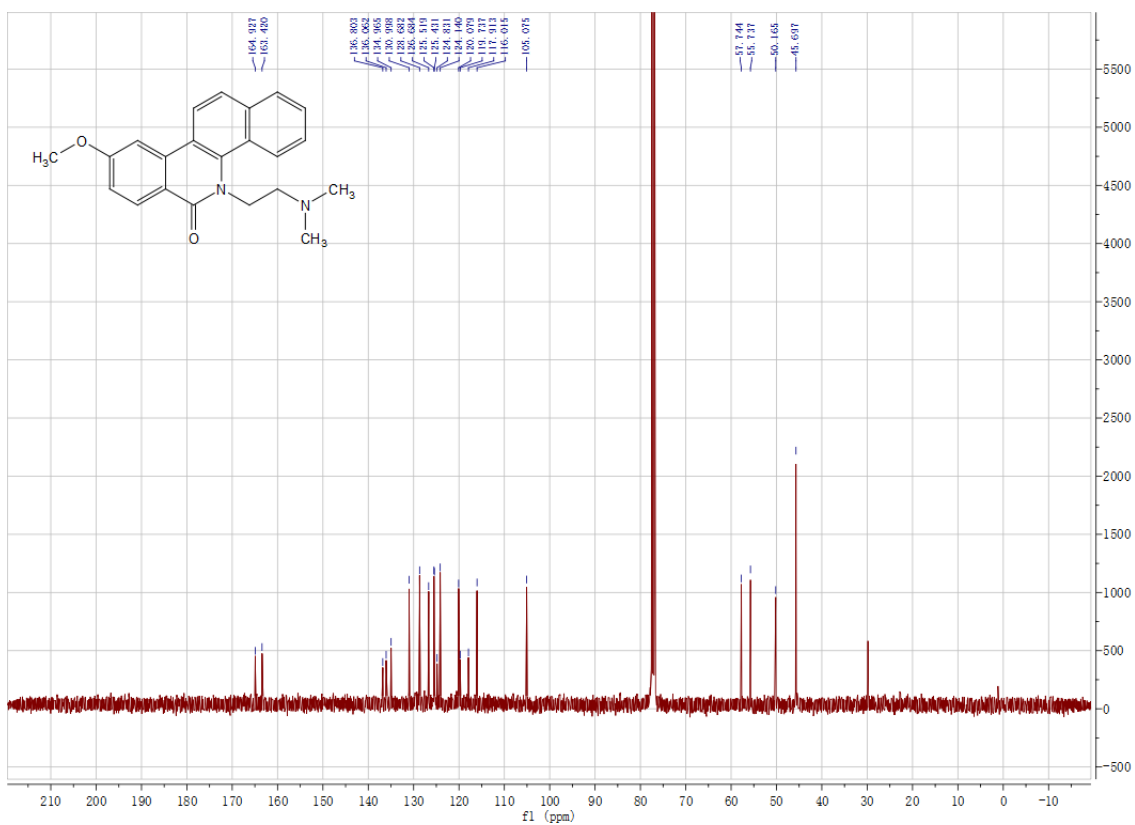

**<sup>1</sup>H NMR and <sup>13</sup>C NMR spectra of compound A10**



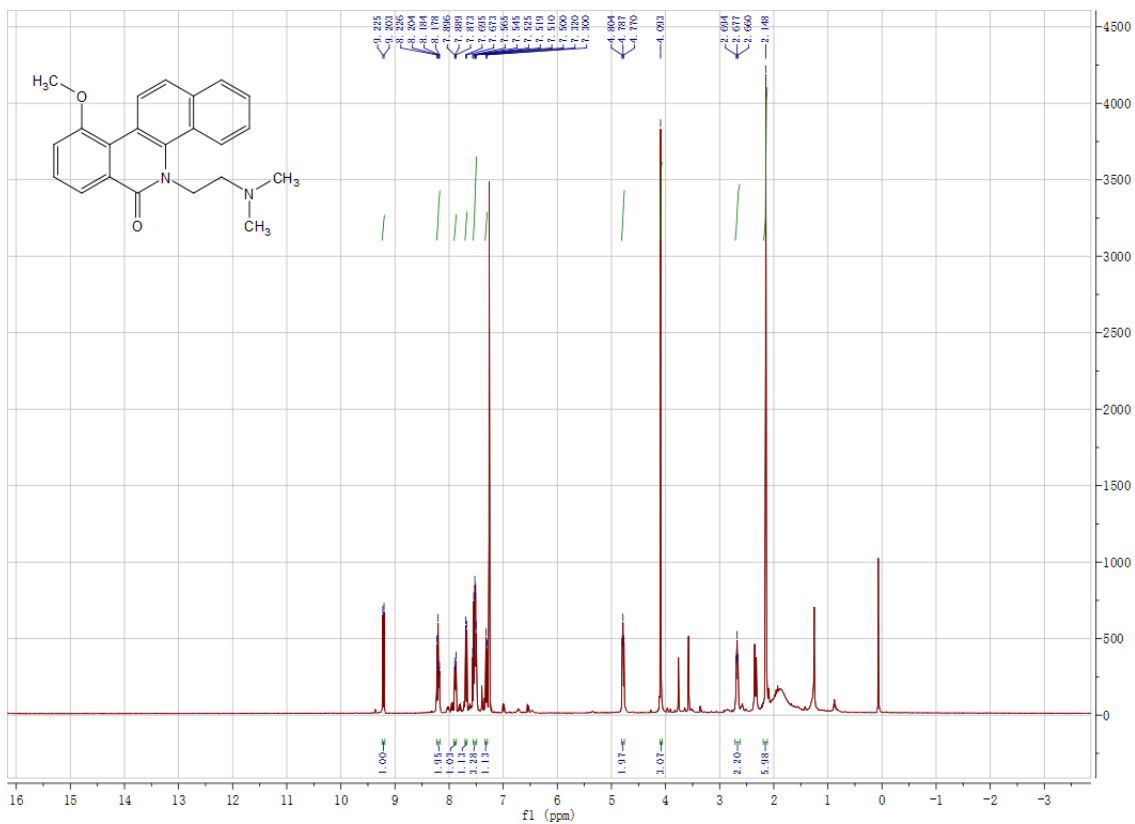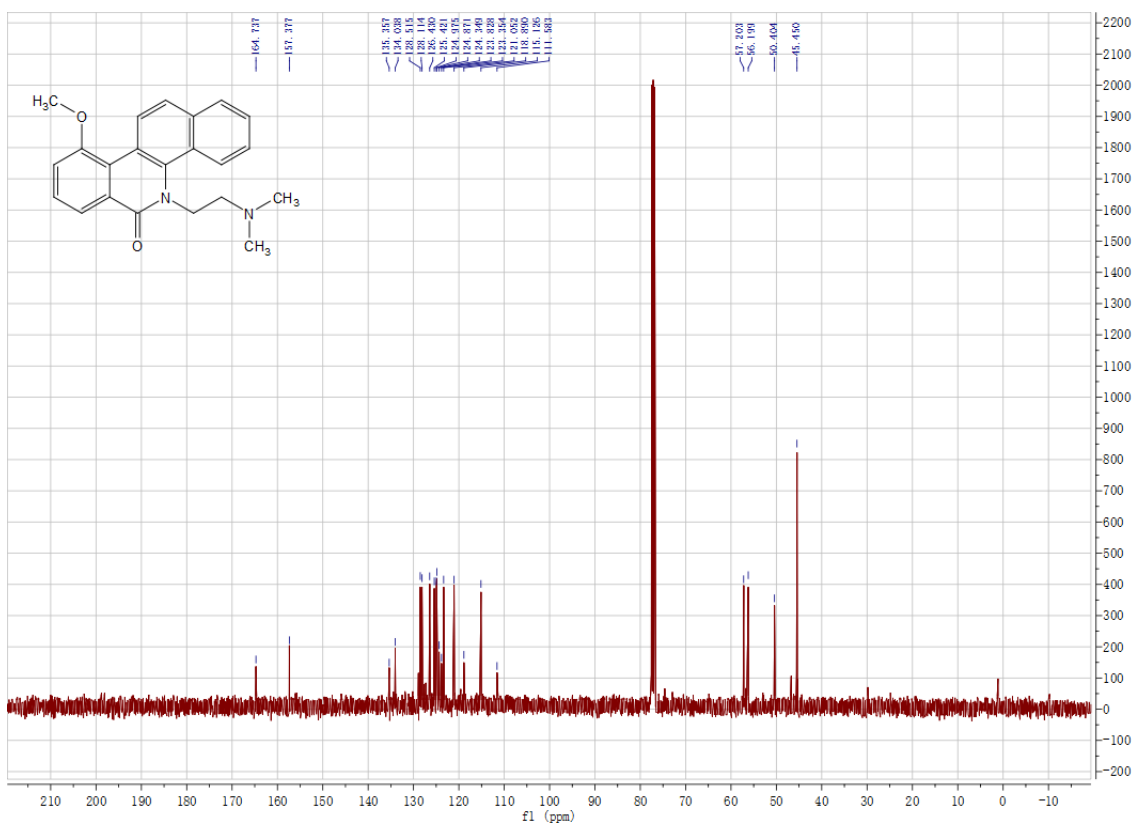

**<sup>1</sup>H NMR and <sup>13</sup>C NMR spectra of compound A11**



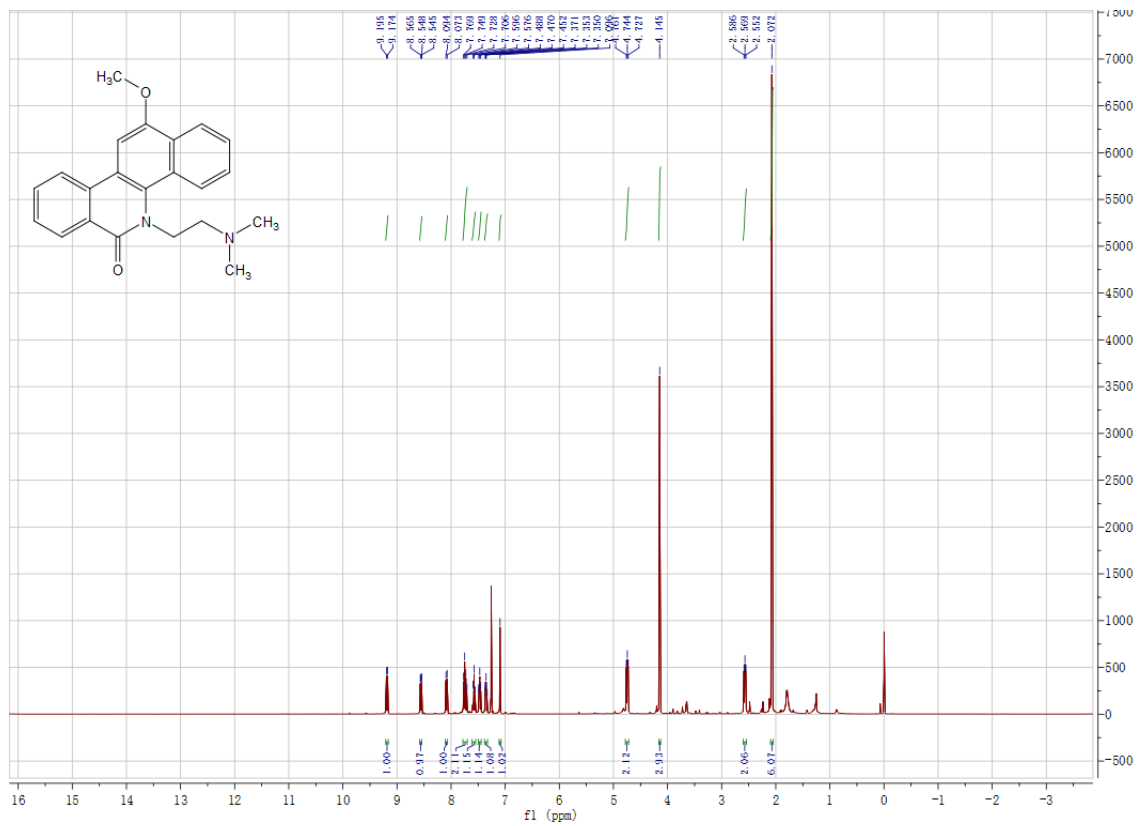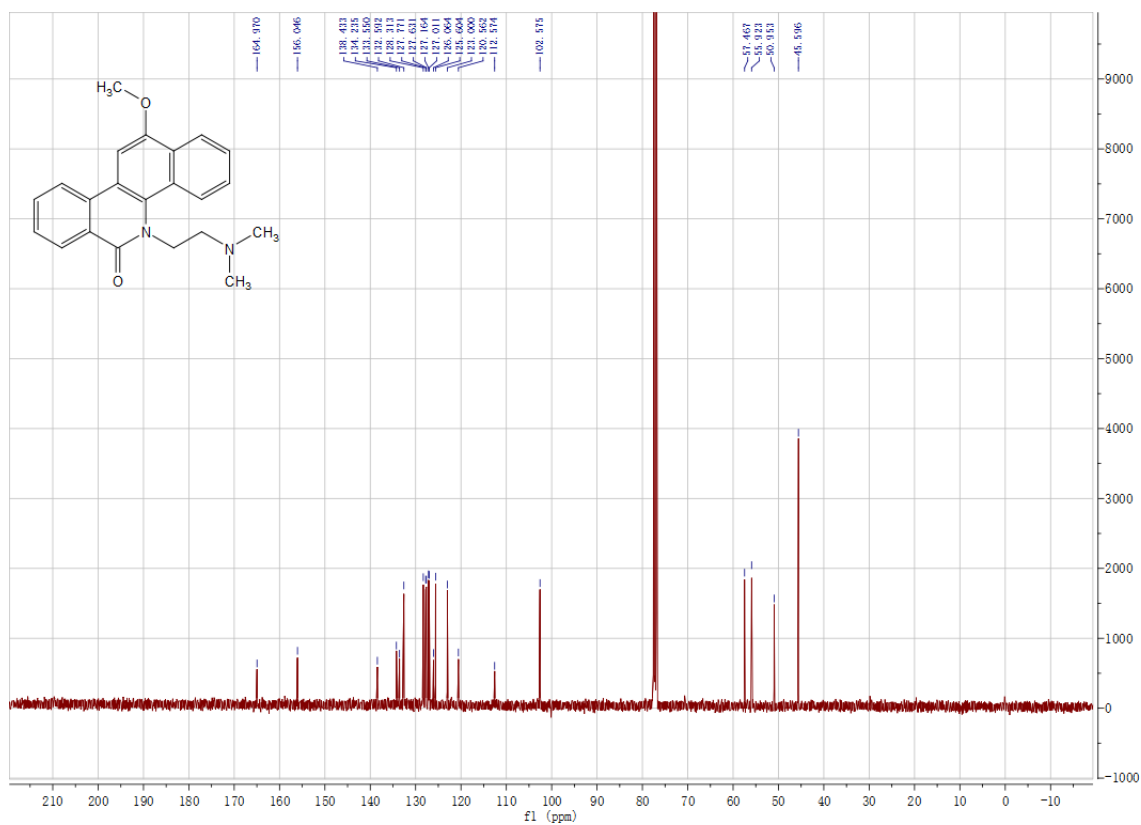

<sup>1</sup>H NMR and <sup>13</sup>C NMR spectra of compound A13

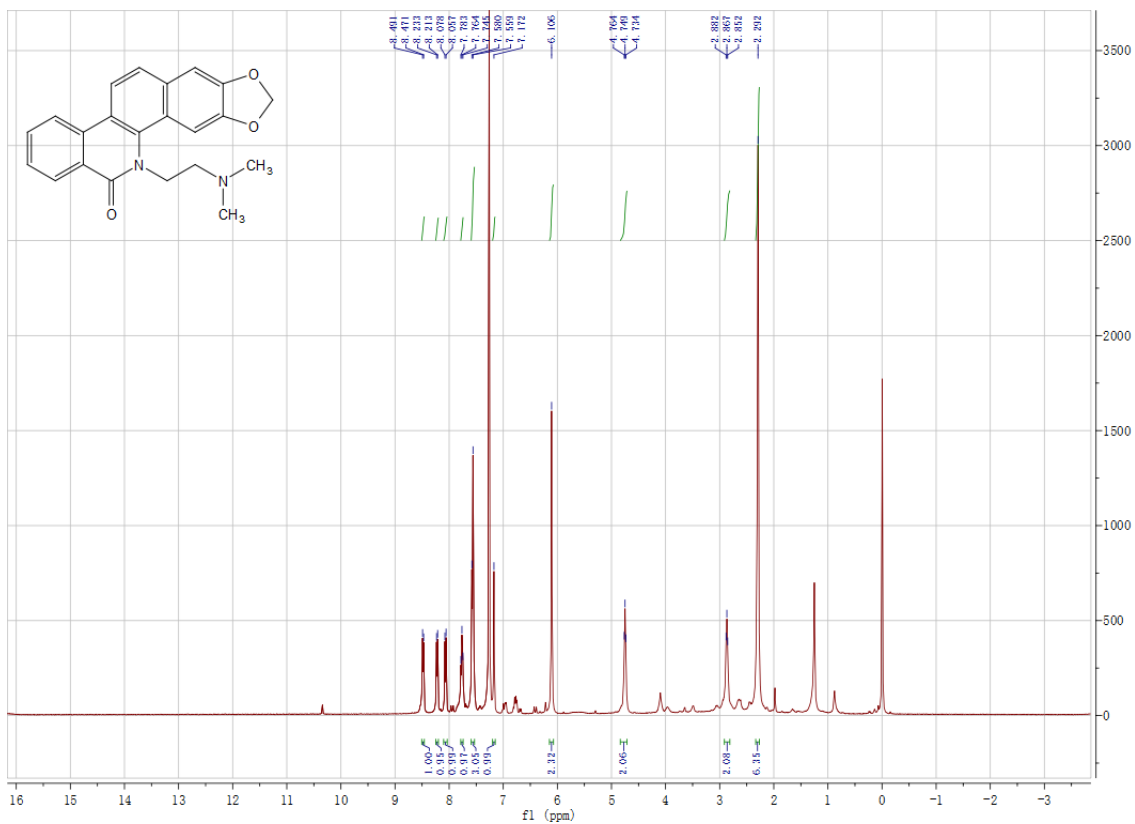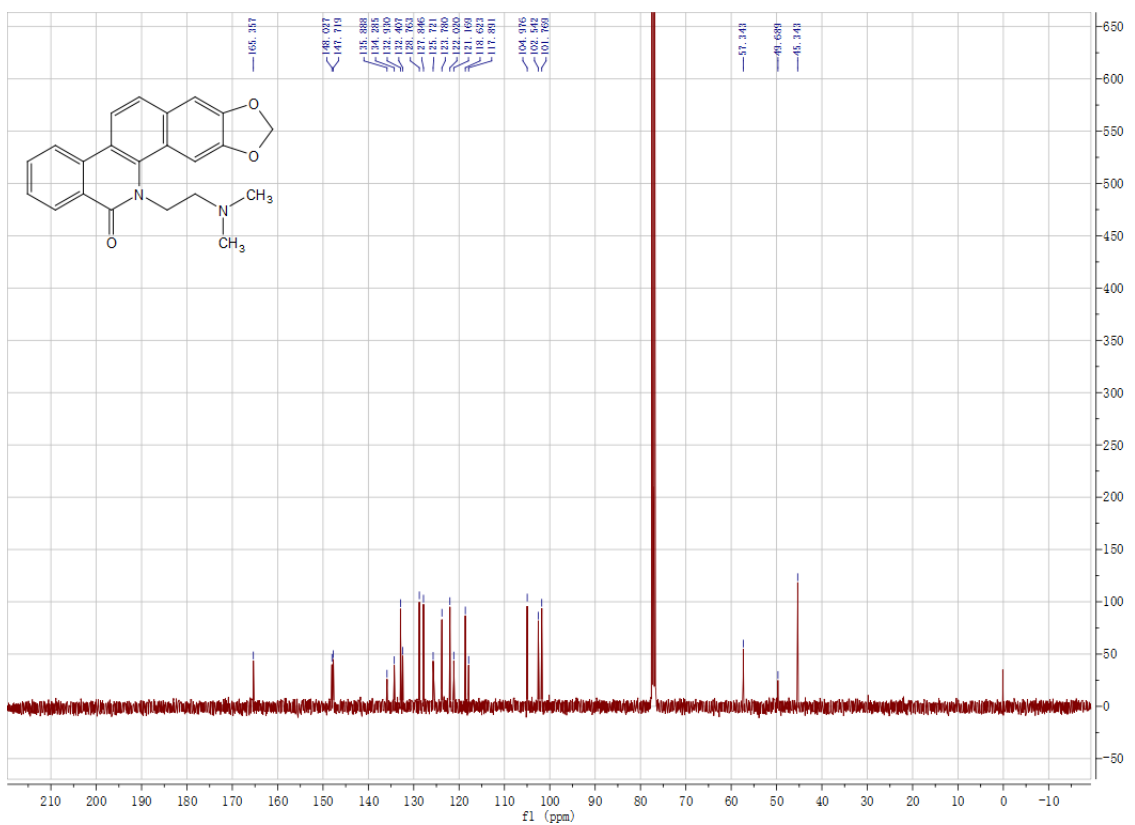

**<sup>1</sup>H NMR and <sup>13</sup>C NMR spectra of compound B1**

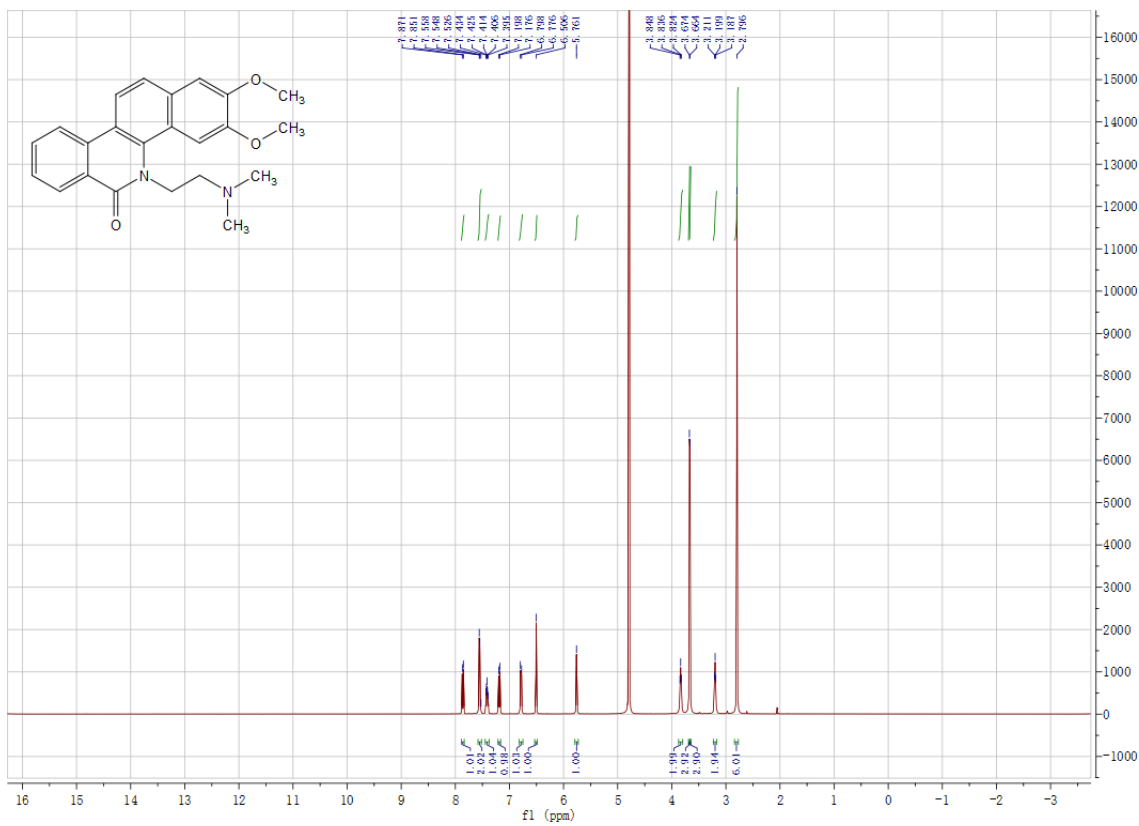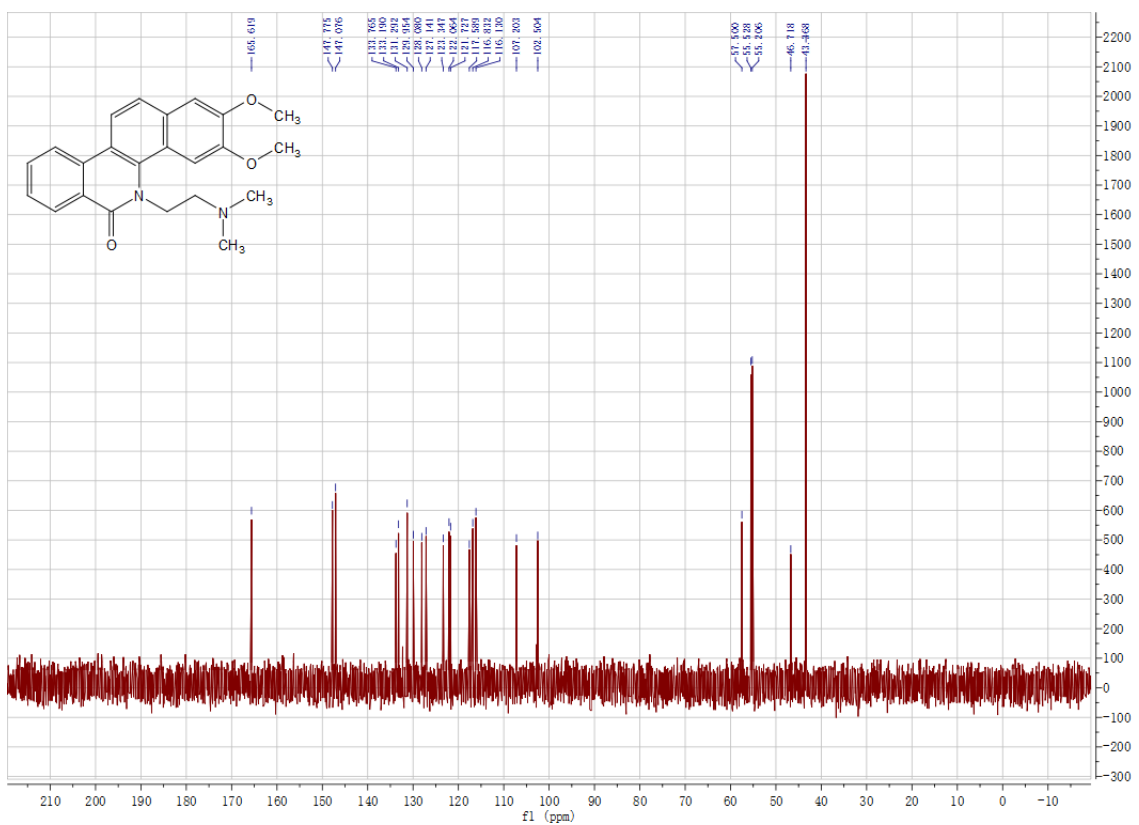

**<sup>1</sup>H NMR and <sup>13</sup>C NMR spectra of compound B2**

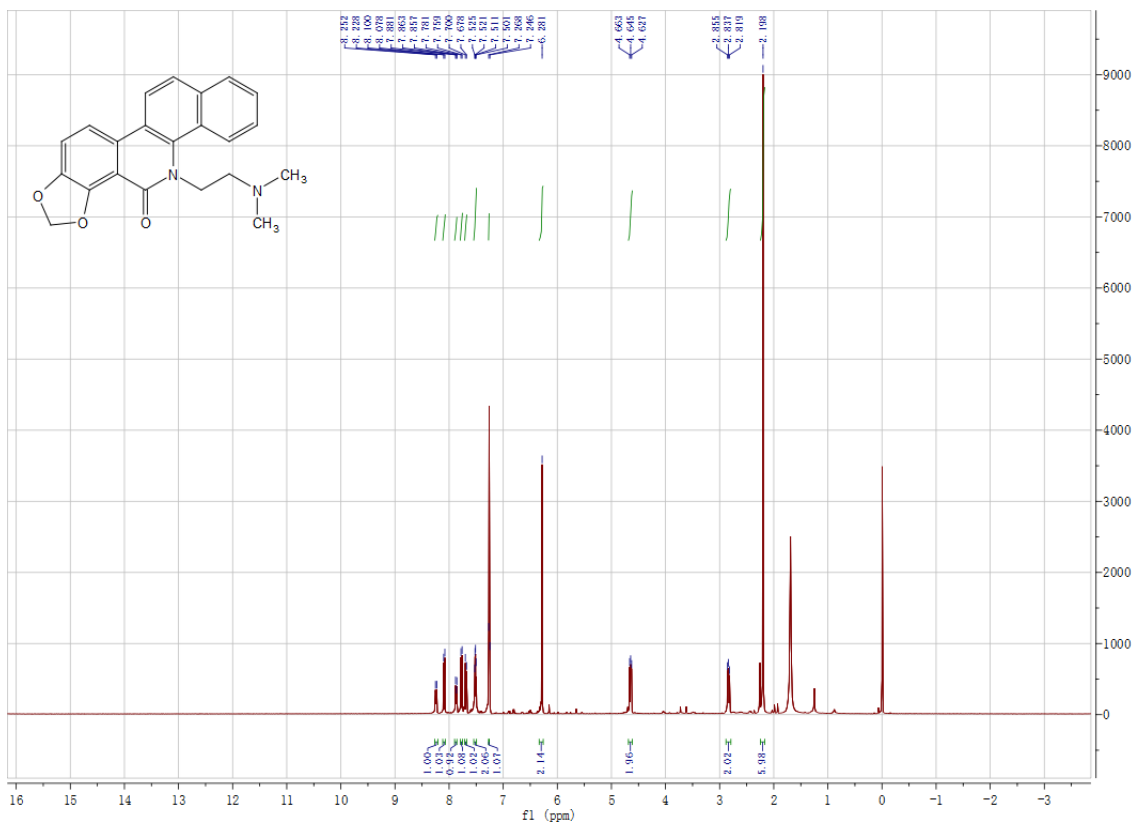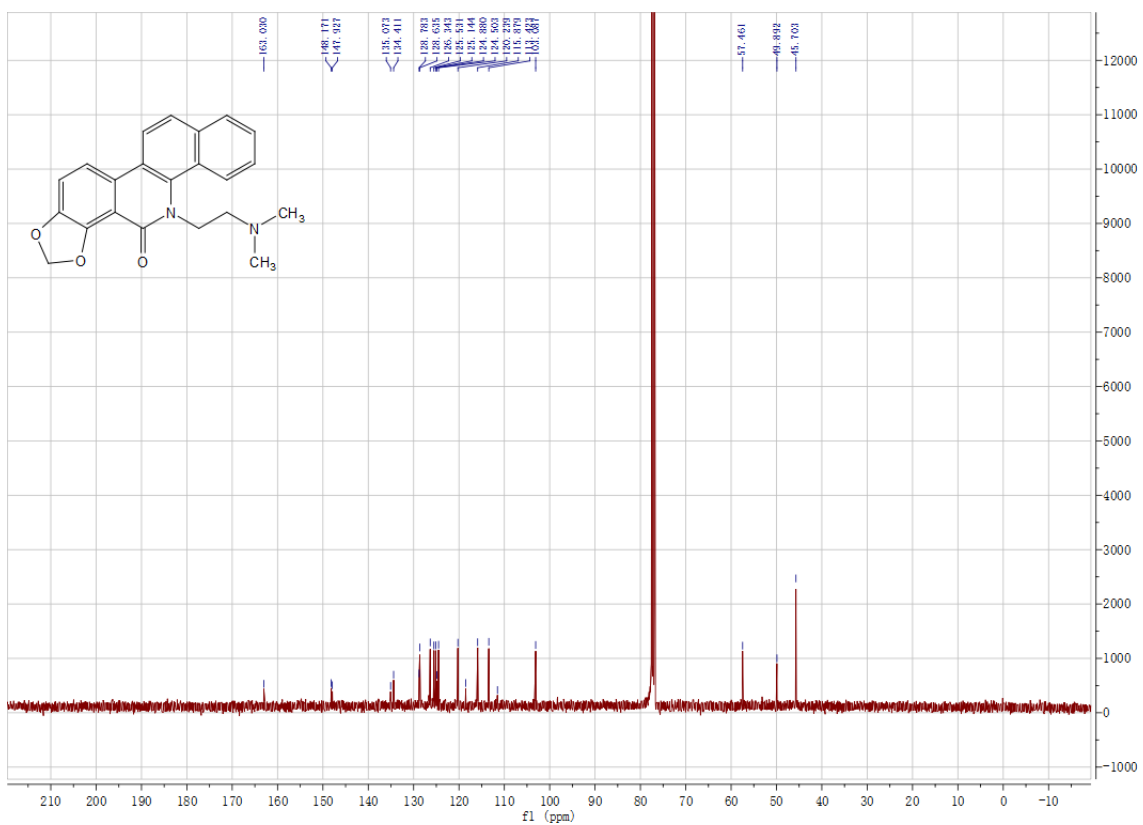

**<sup>1</sup>H NMR and <sup>13</sup>C NMR spectra of compound B3**







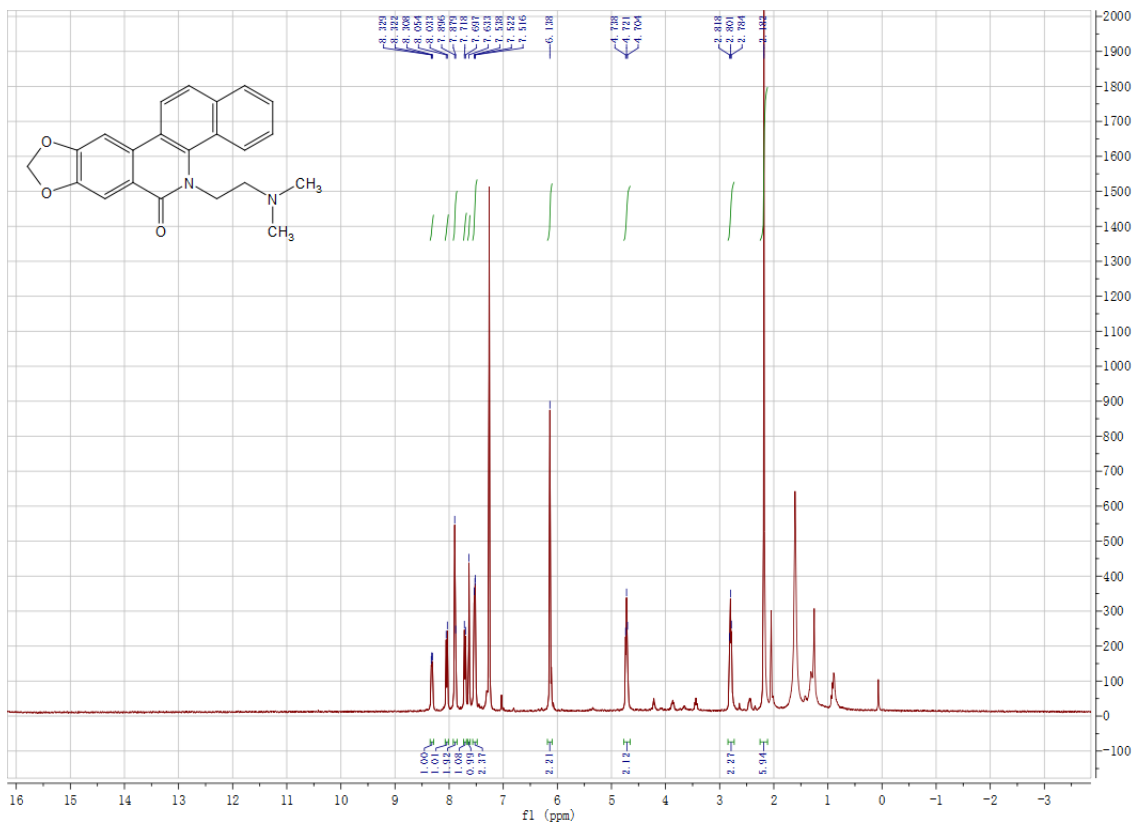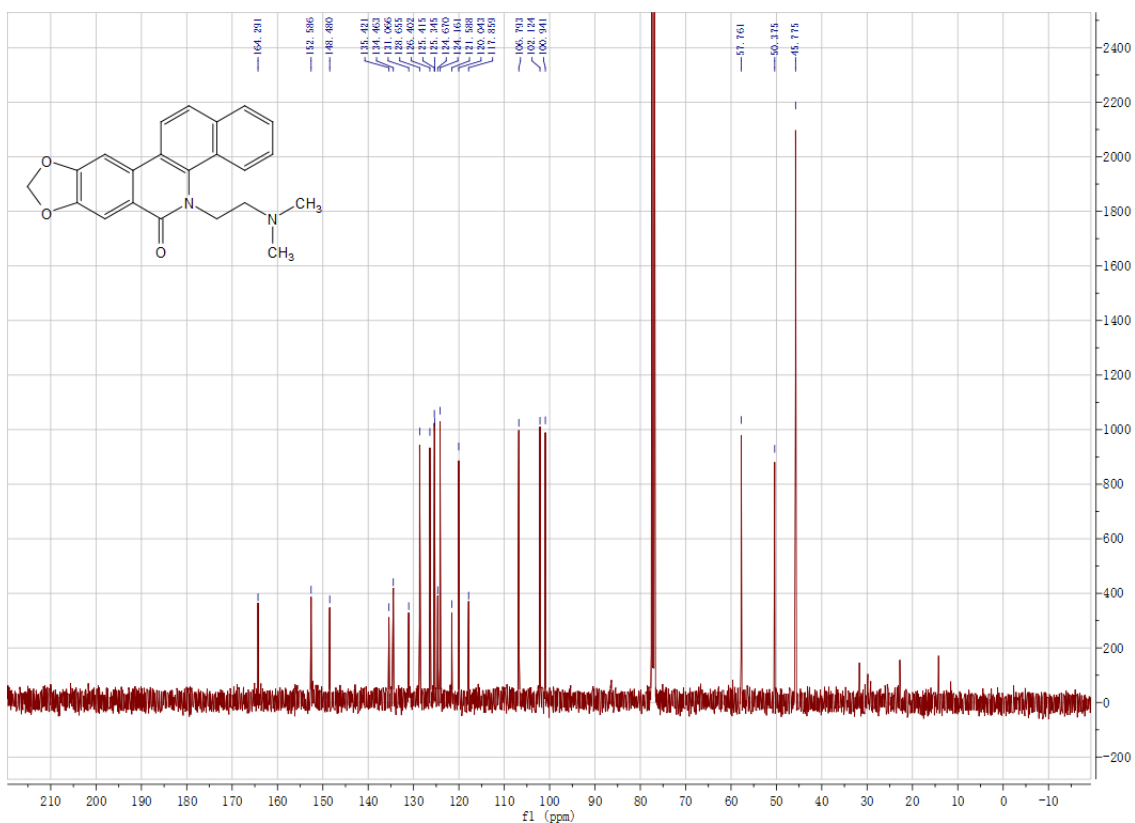

**<sup>1</sup>H NMR and <sup>13</sup>C NMR spectra of compound B6**

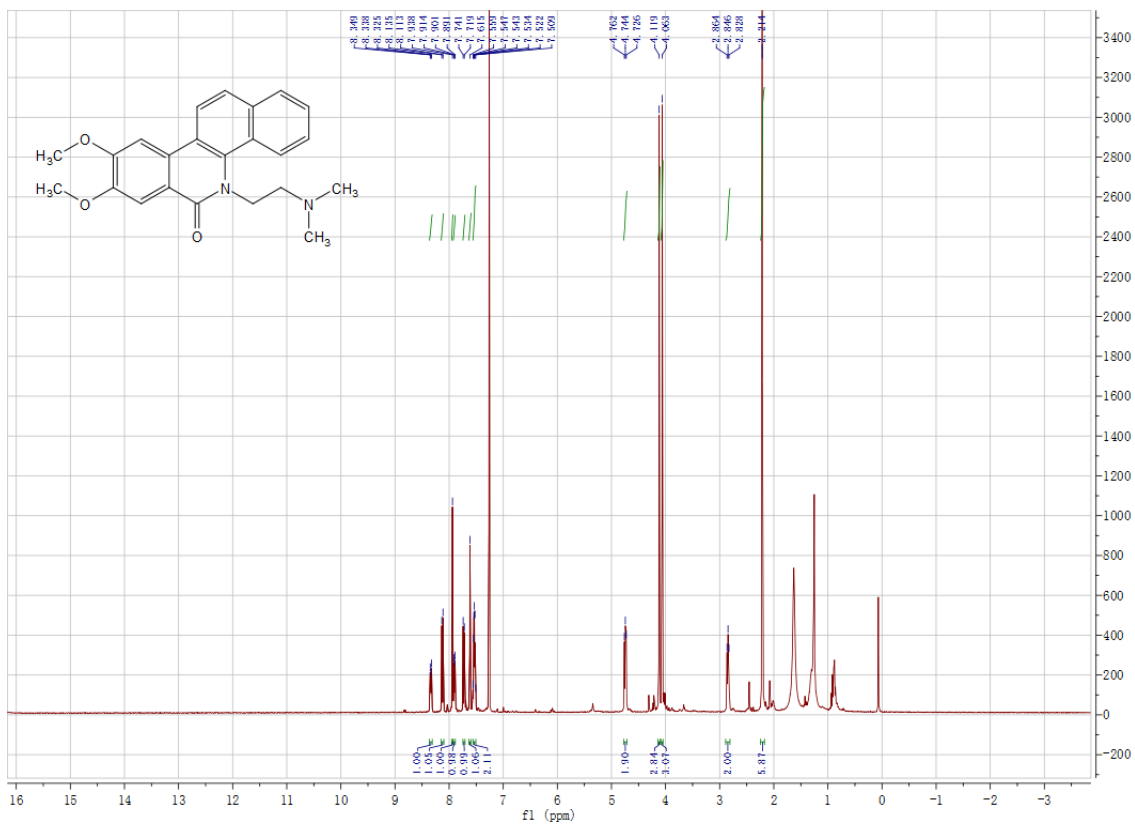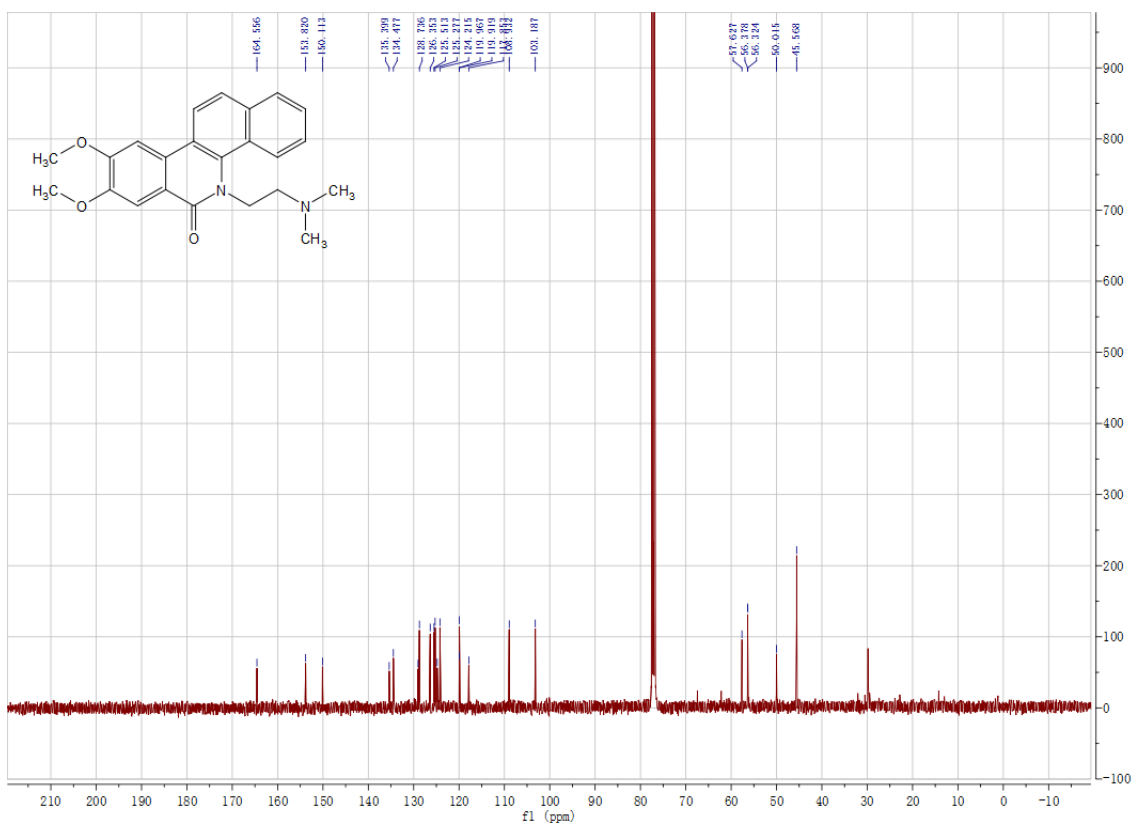

**<sup>1</sup>H NMR and <sup>13</sup>C NMR spectra of compound B7**

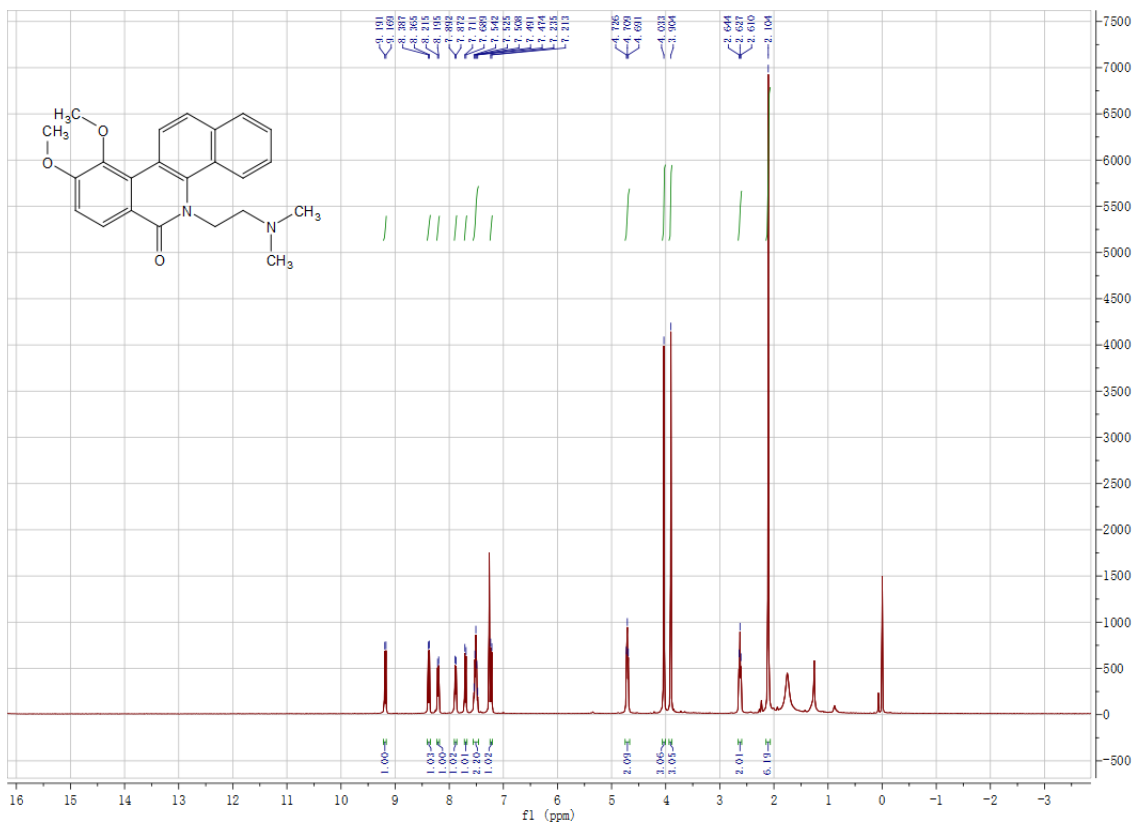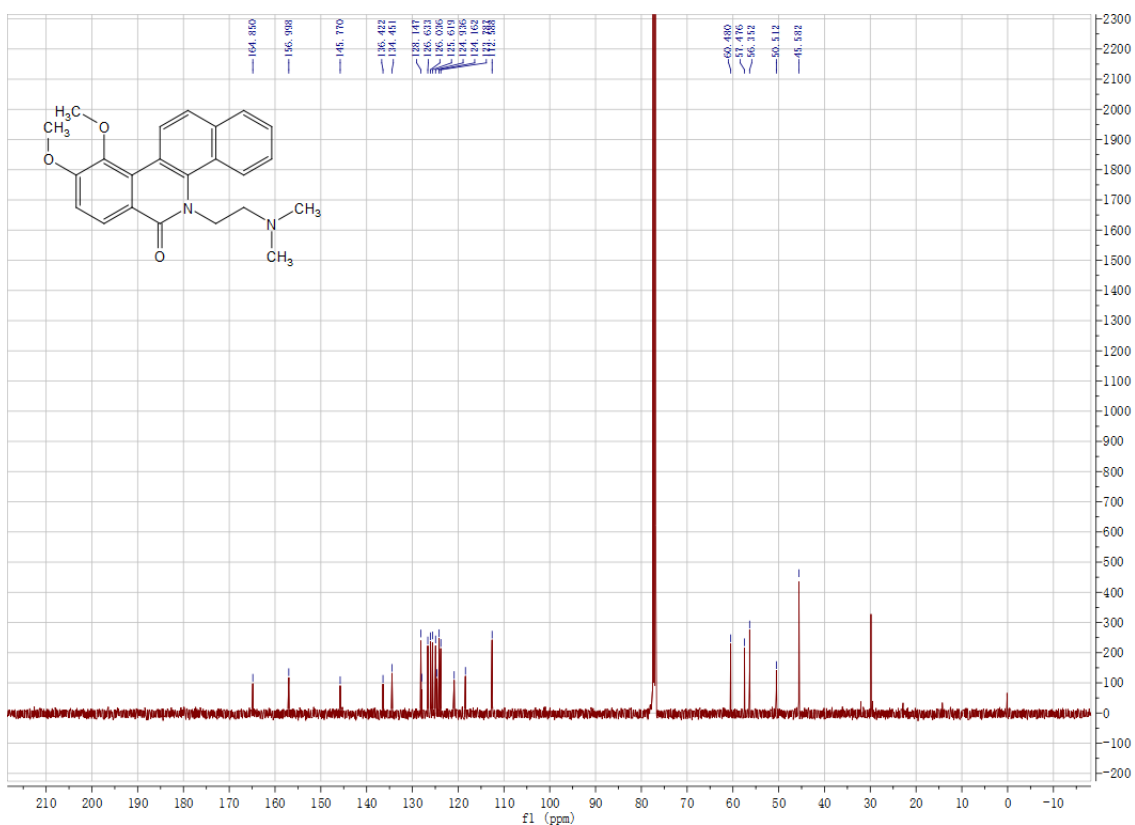

$^1\text{H NMR}$  and  $^{13}\text{C NMR}$  spectra of compound B8

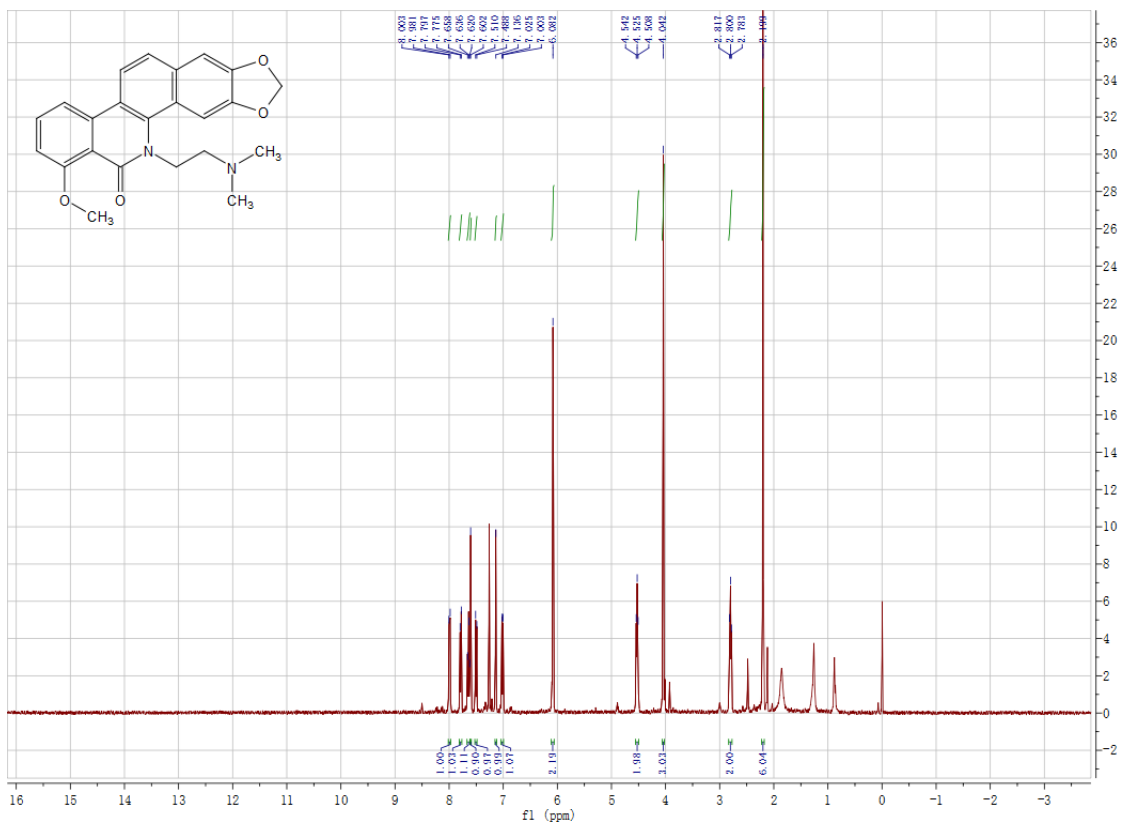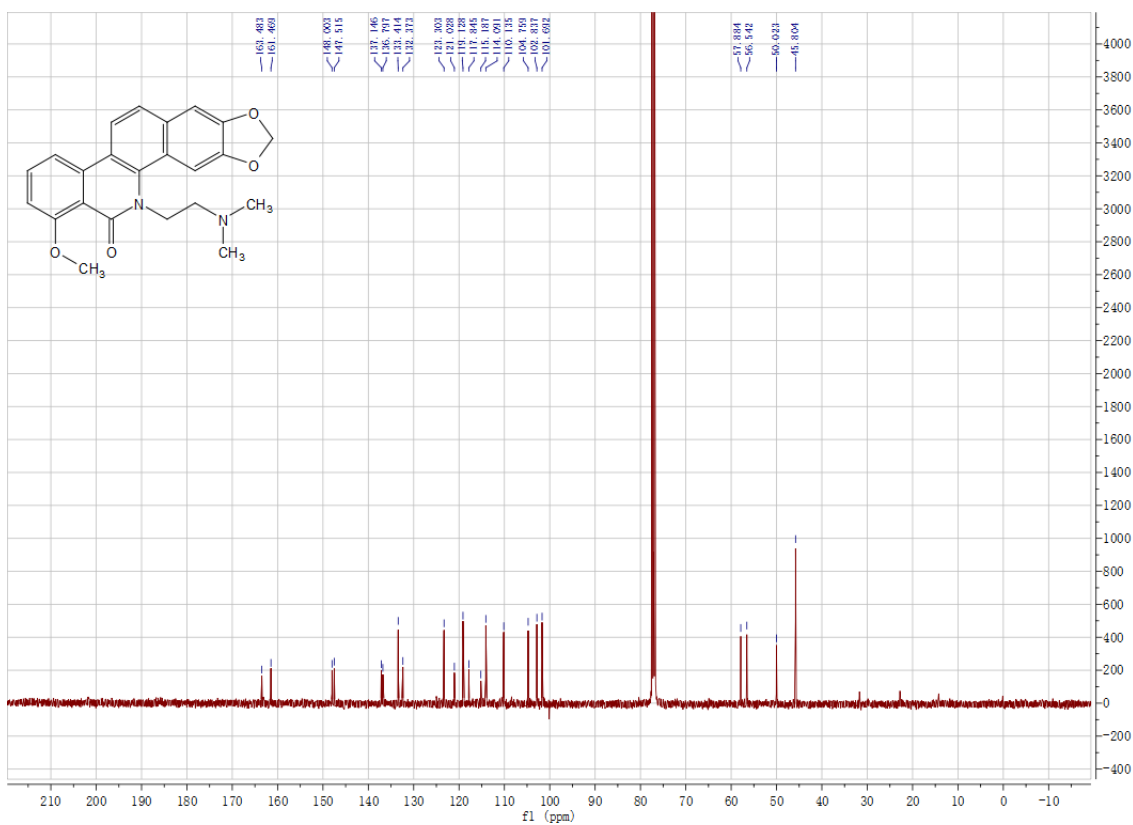

<sup>1</sup>H NMR and <sup>13</sup>C NMR spectra of compound C1

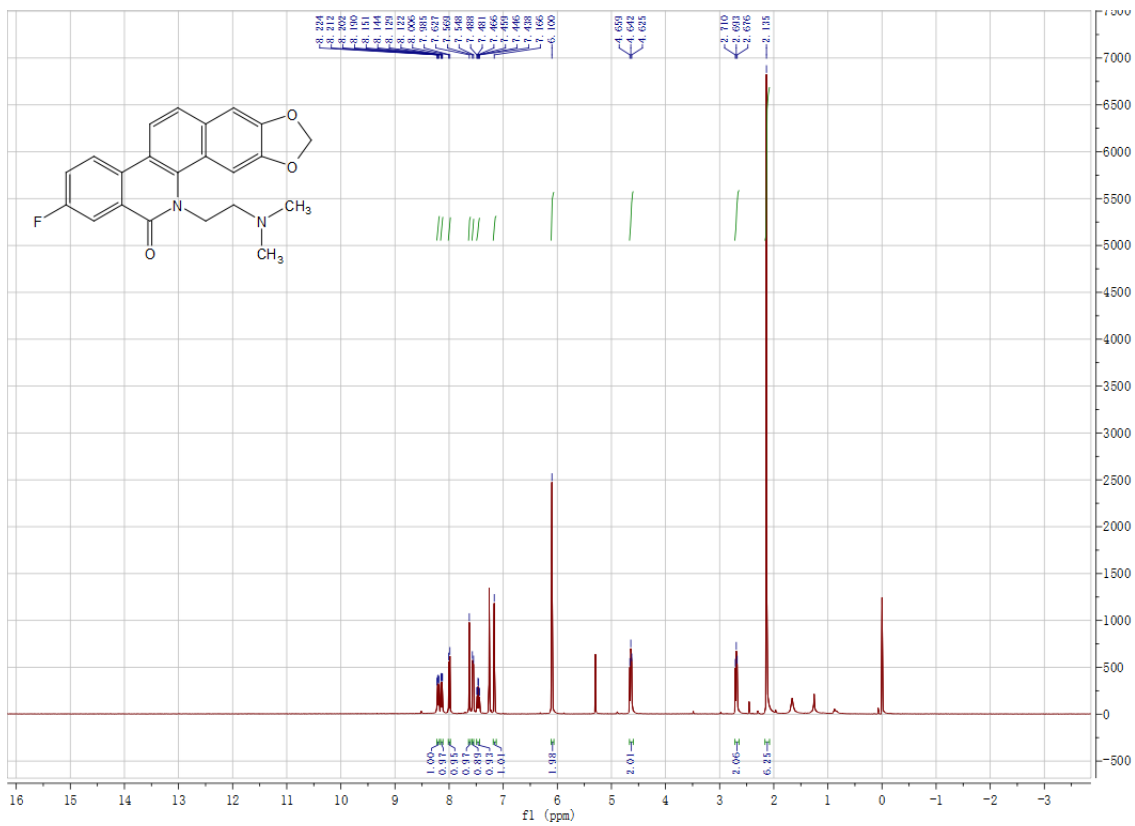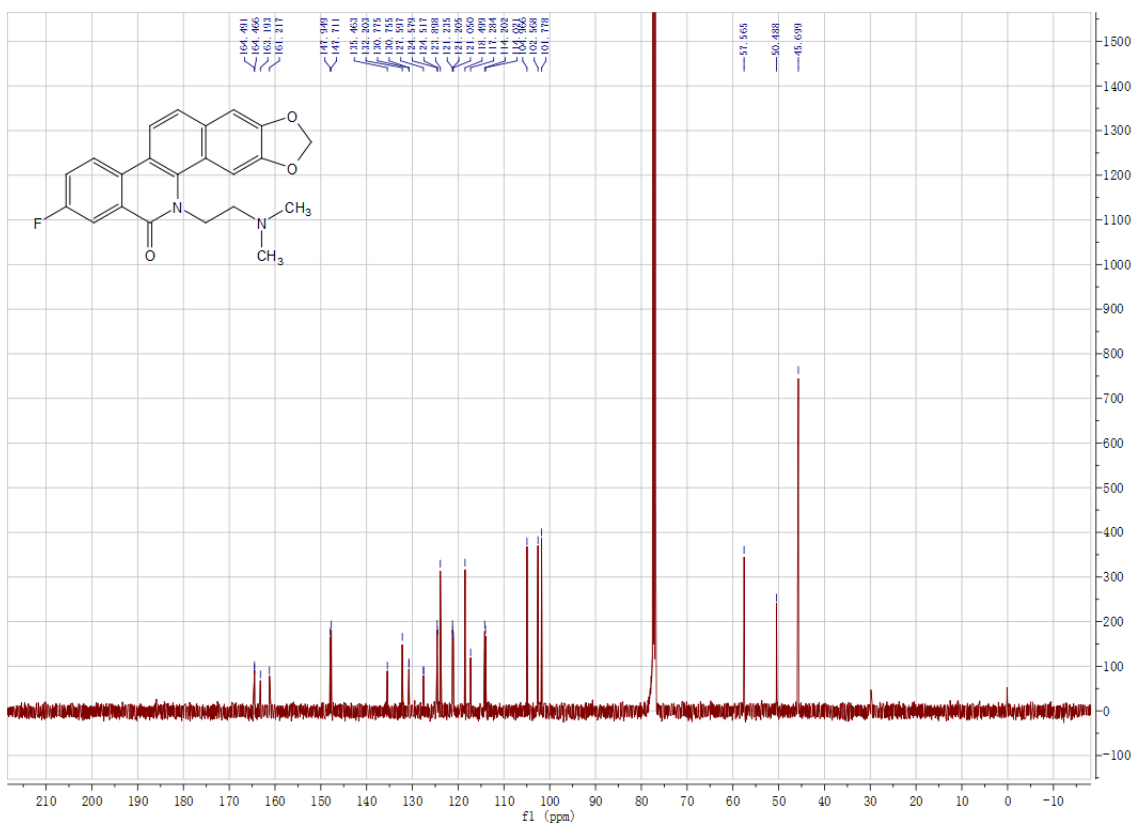

<sup>1</sup>H NMR and <sup>13</sup>C NMR spectra of compound C2

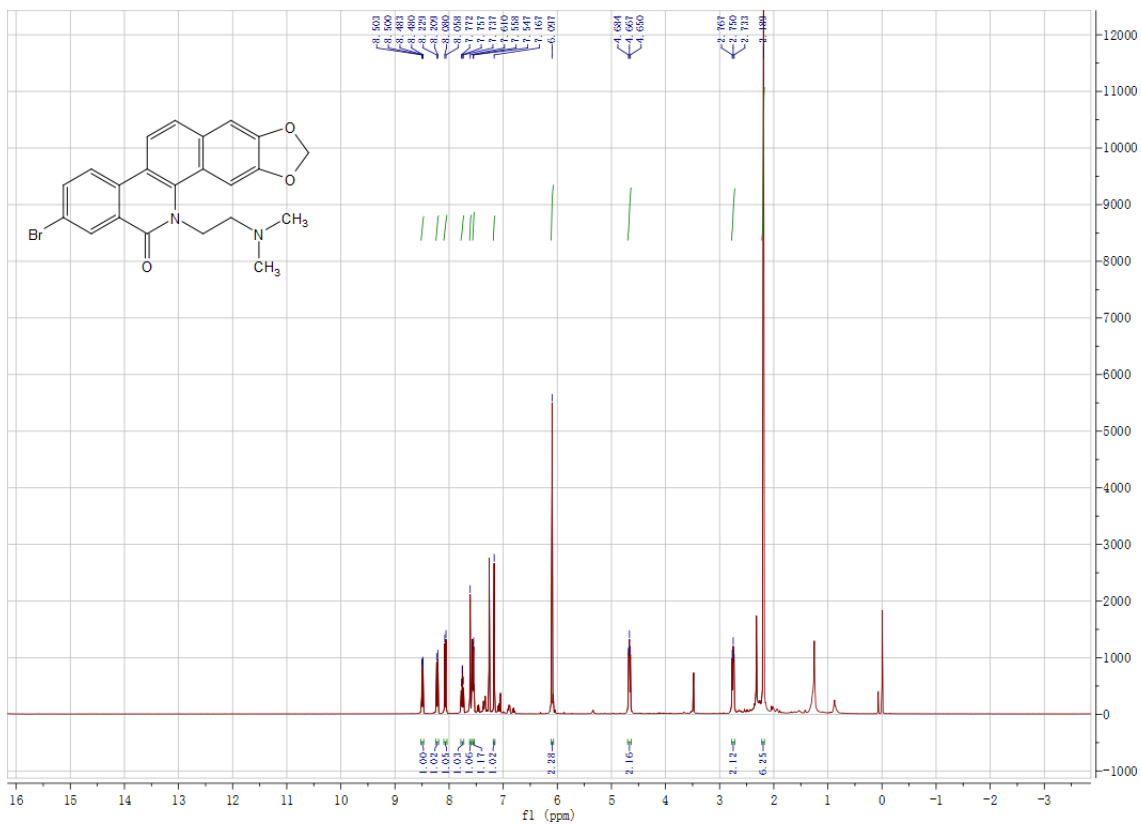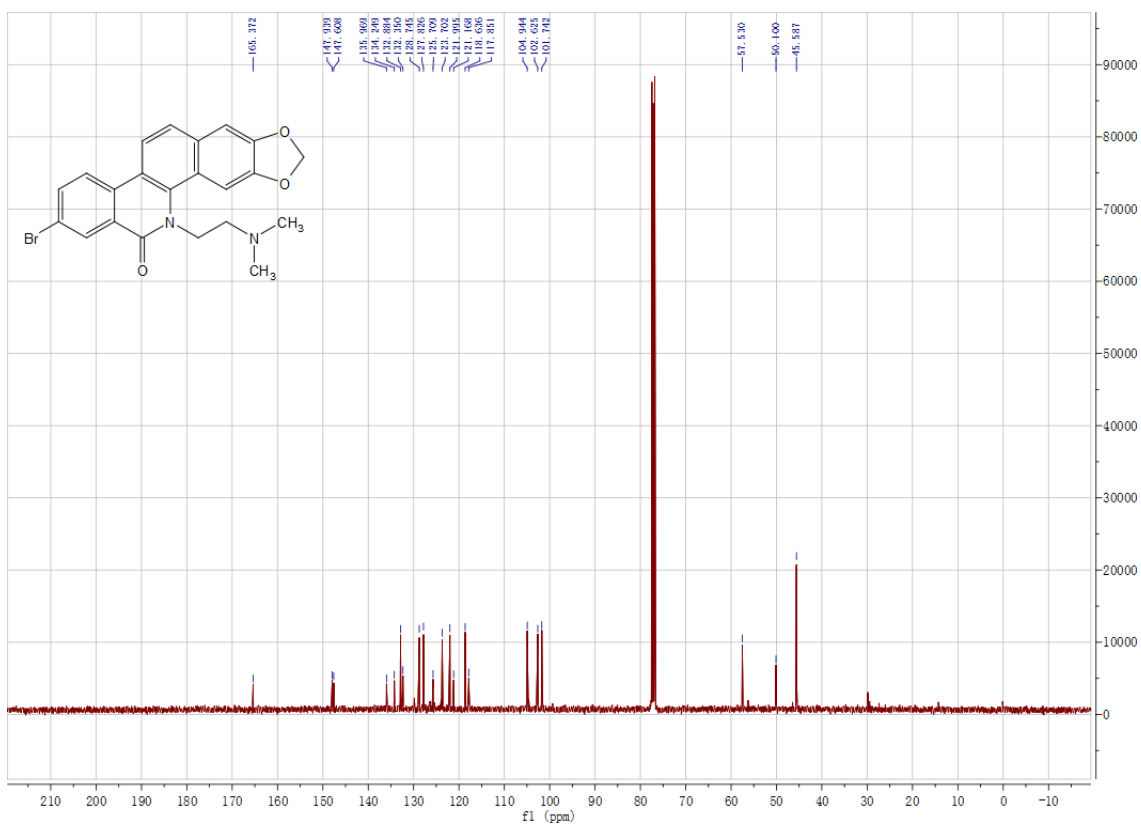

<sup>1</sup>H NMR and <sup>13</sup>C NMR spectra of compound C3

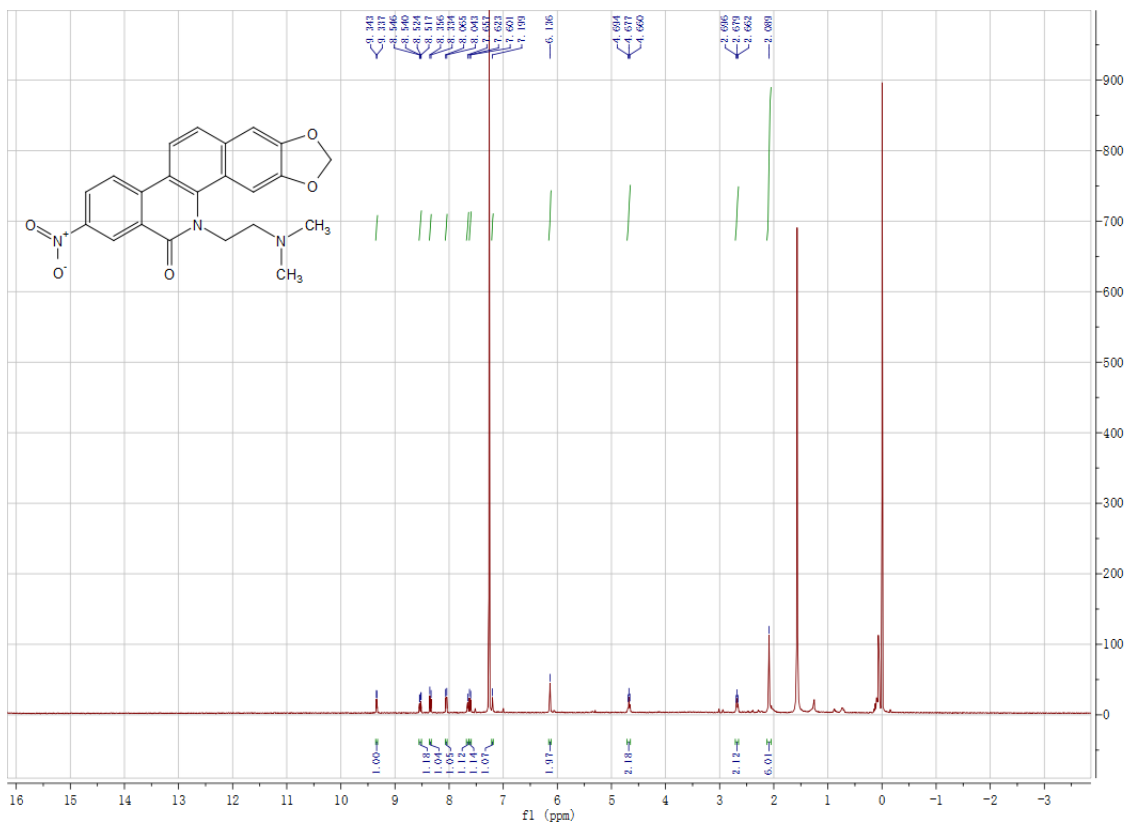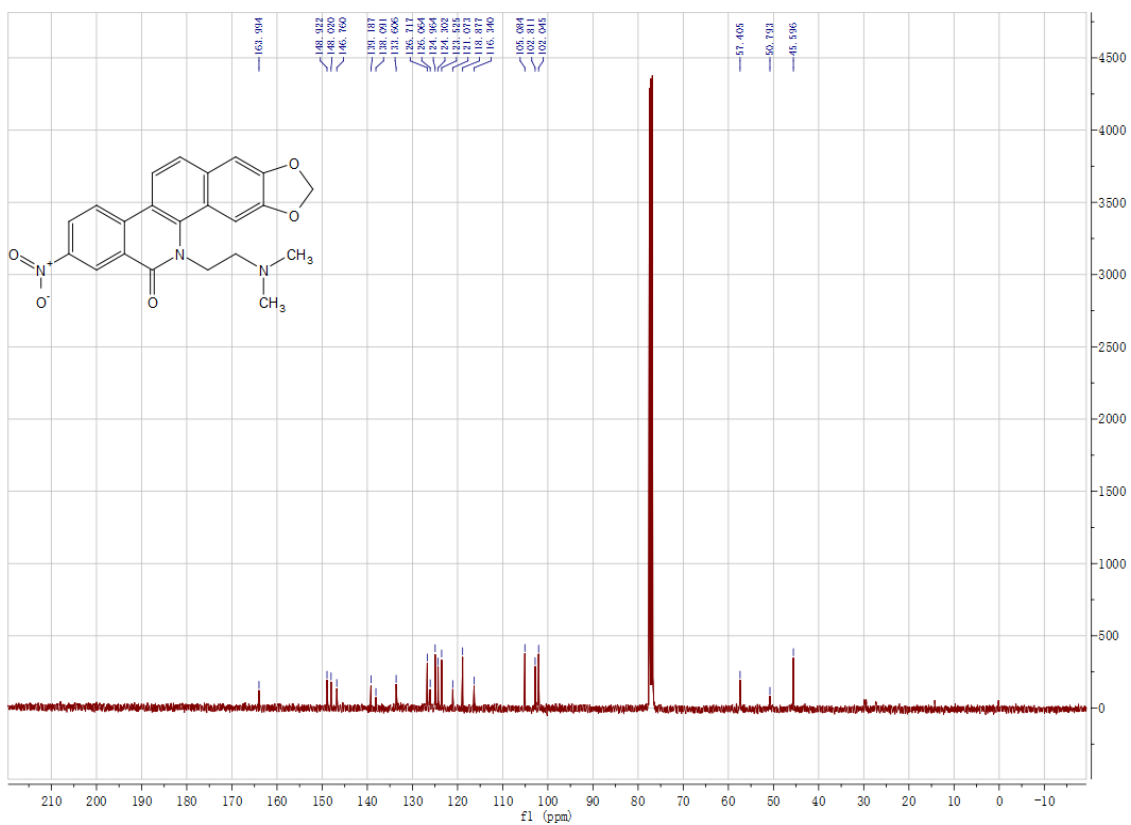

<sup>1</sup>H NMR and <sup>13</sup>C NMR spectra of compound C4





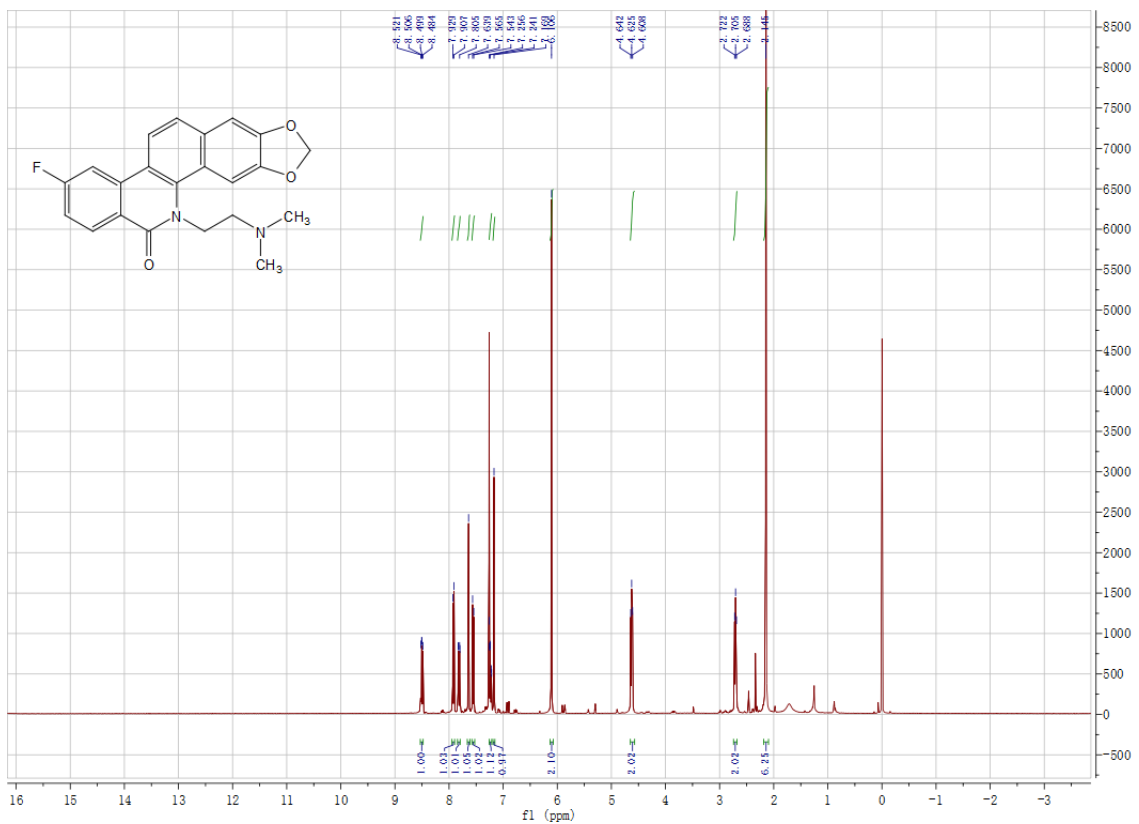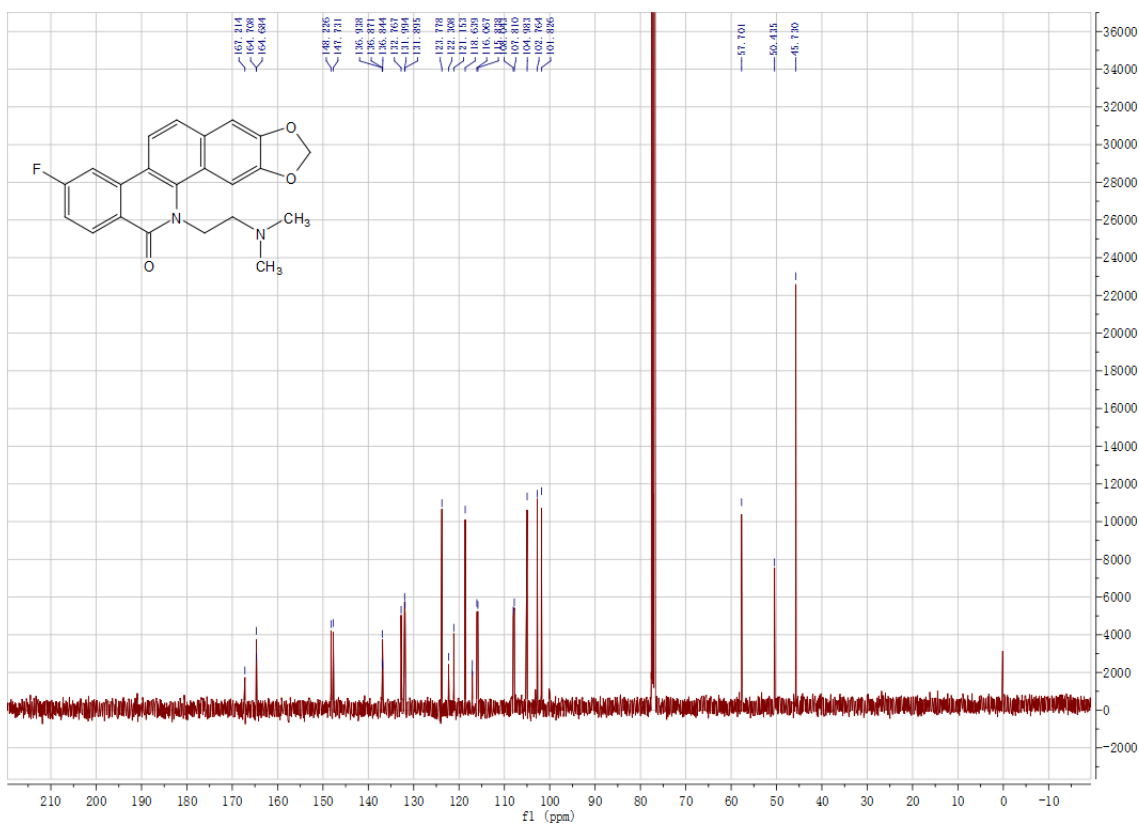

<sup>1</sup>H NMR and <sup>13</sup>C NMR spectra of compound C6

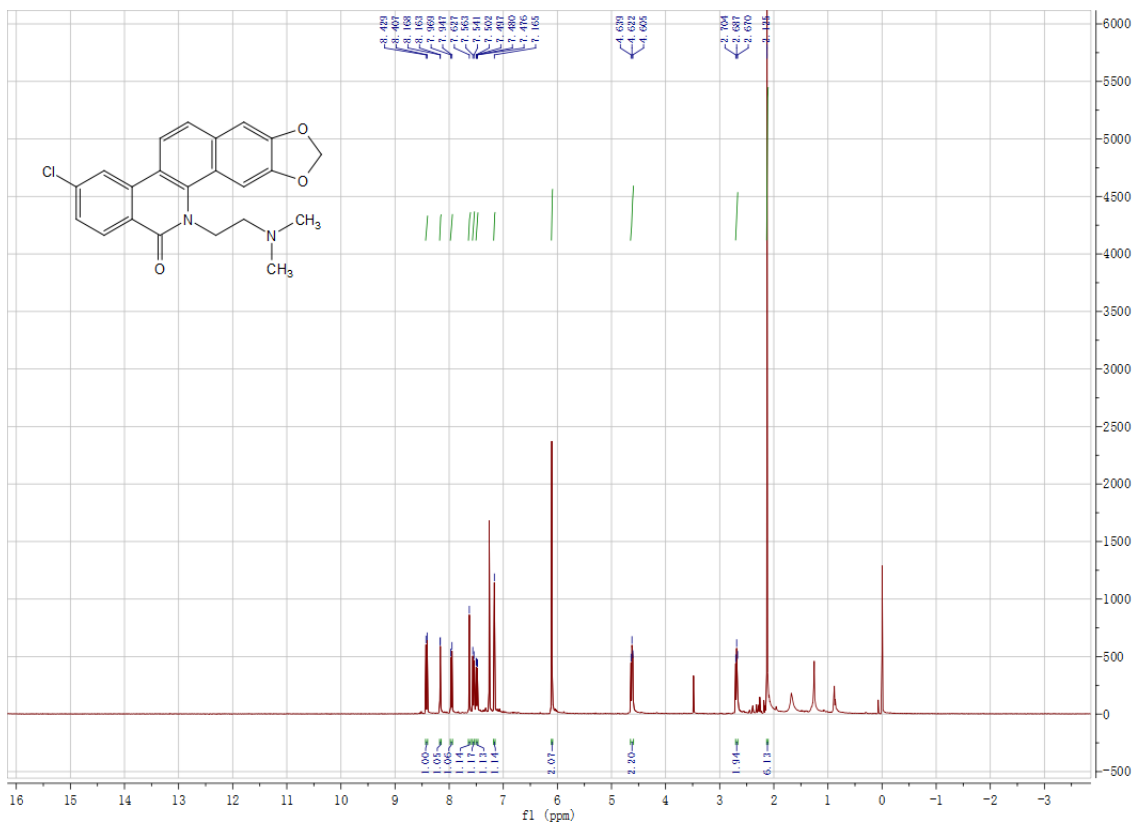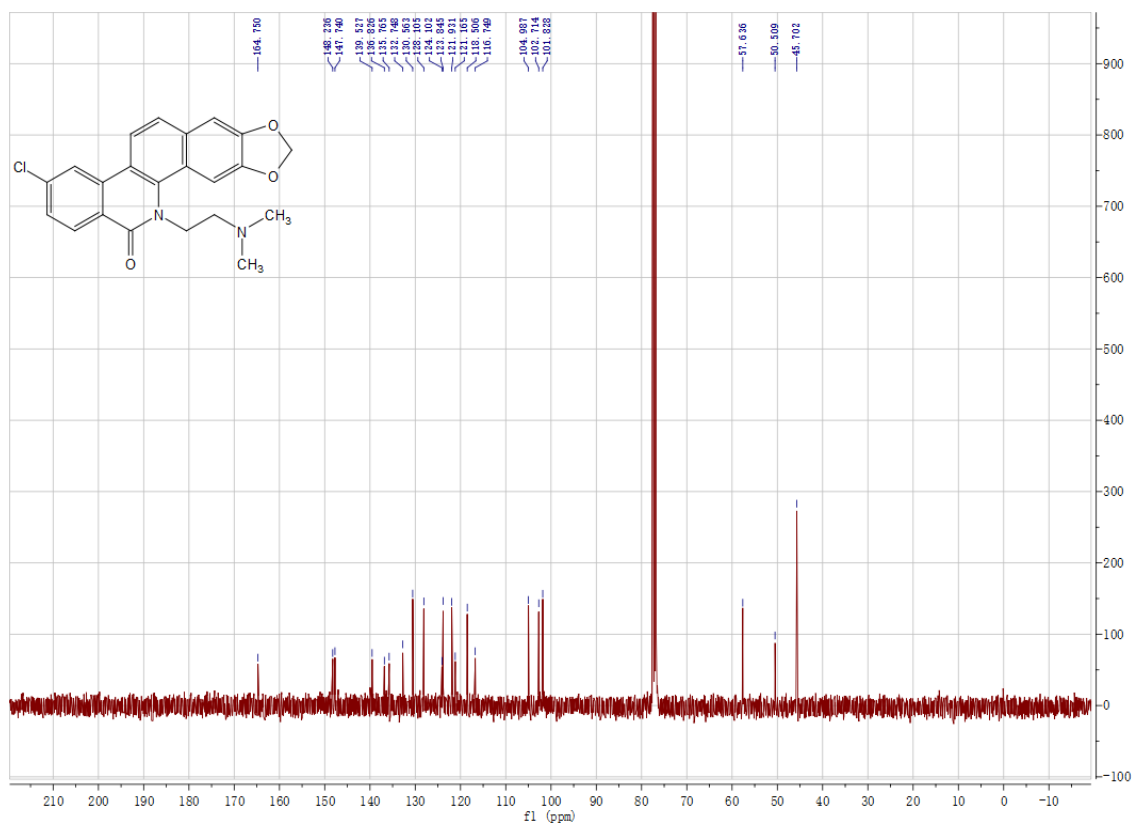

<sup>1</sup>H NMR and <sup>13</sup>C NMR spectra of compound C7

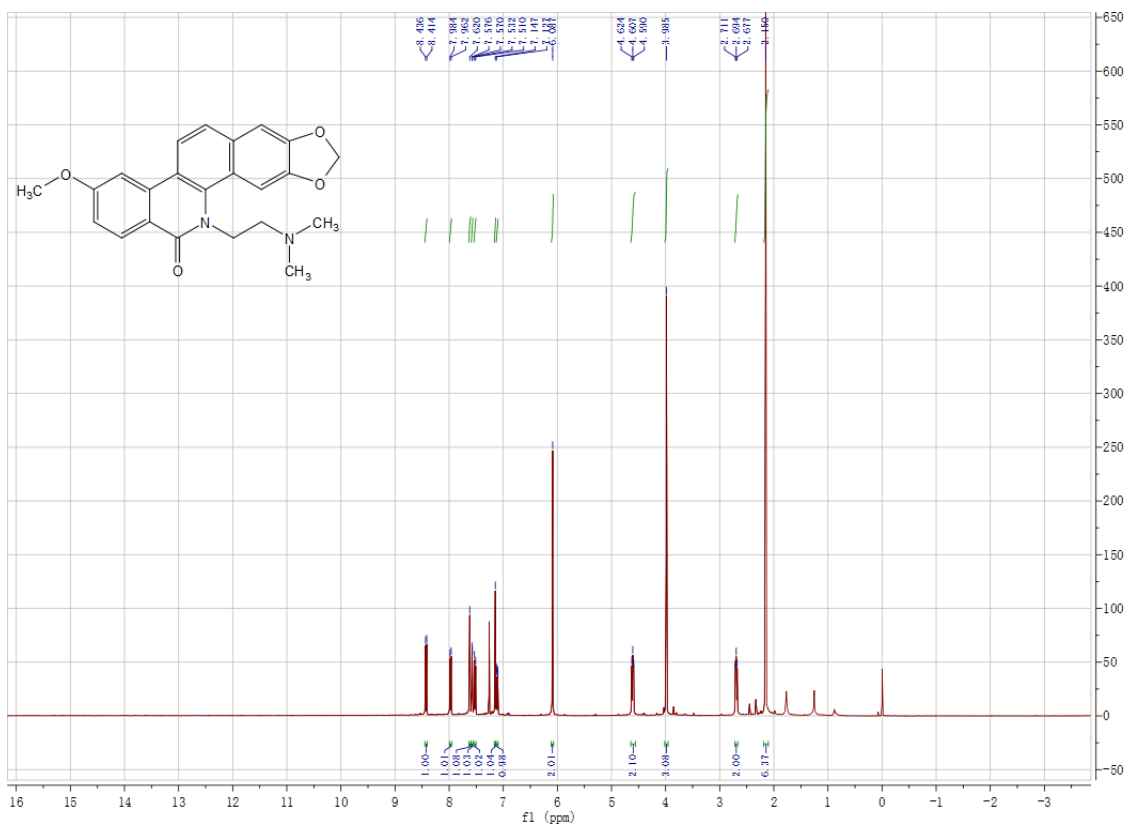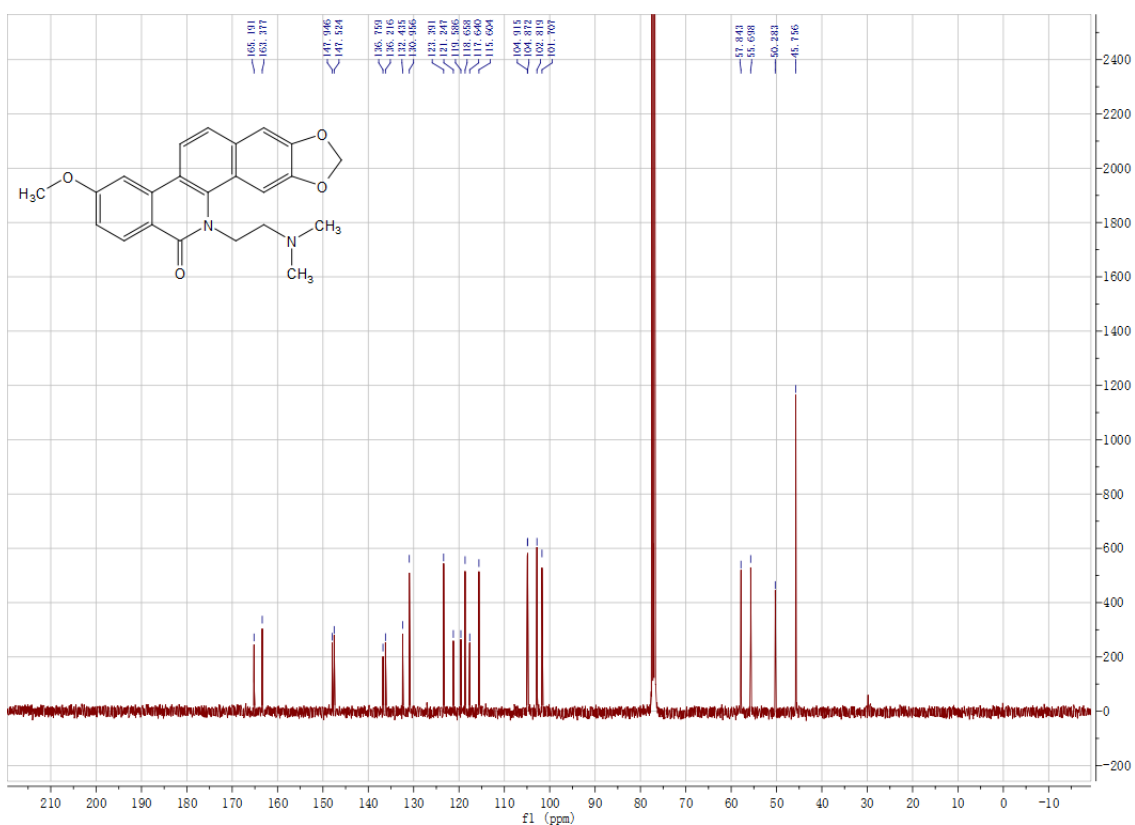

<sup>1</sup>H NMR and <sup>13</sup>C NMR spectra of compound C8

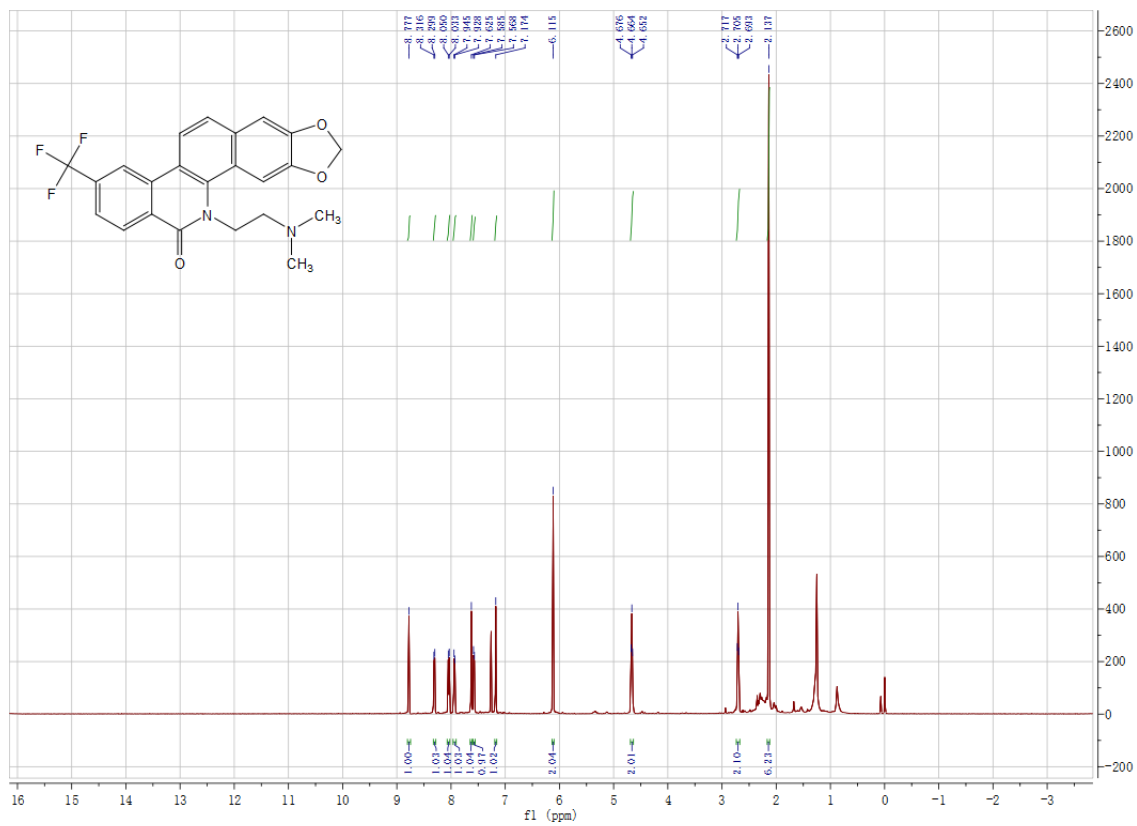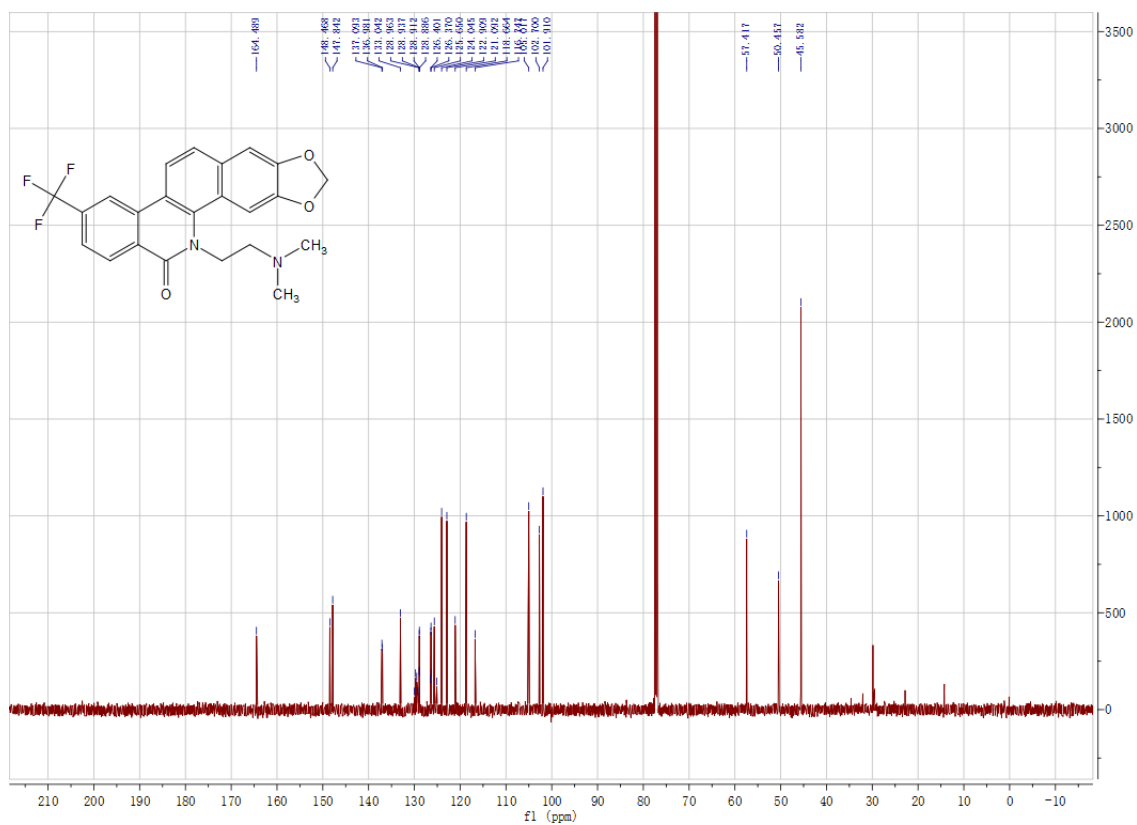

**<sup>1</sup>H NMR and <sup>13</sup>C NMR spectra of compound C9**

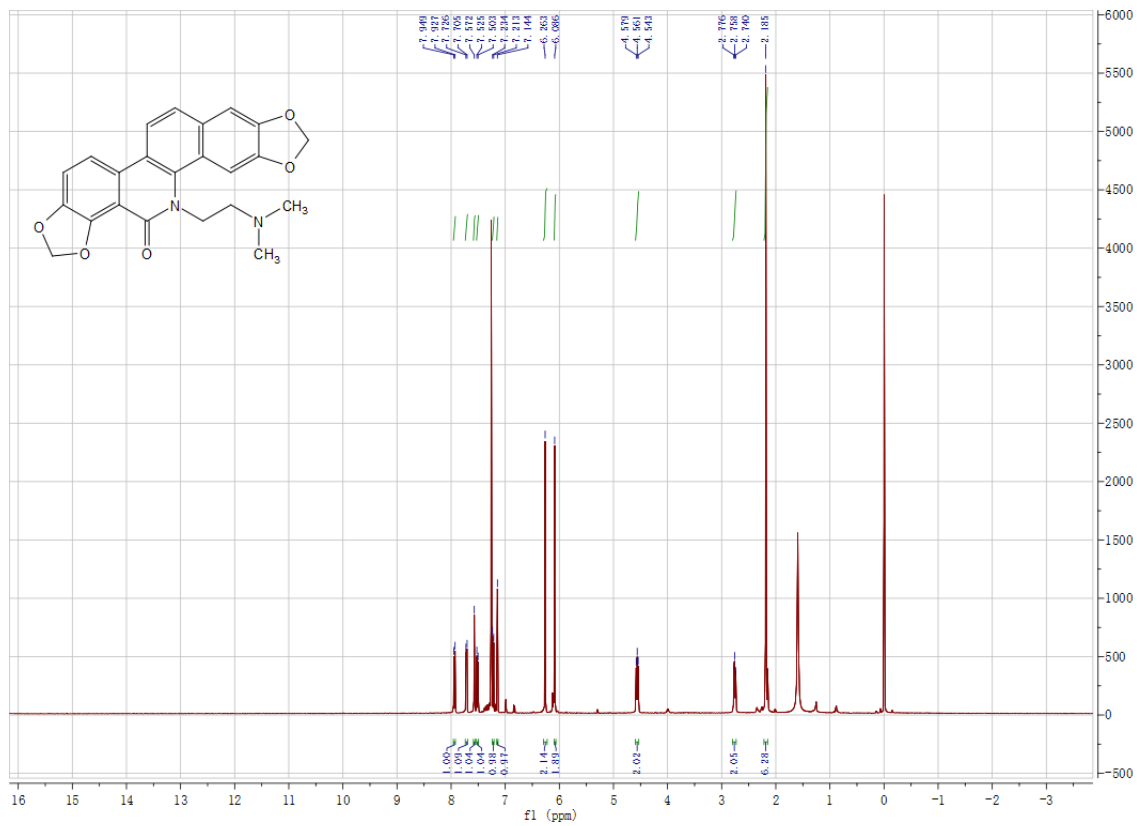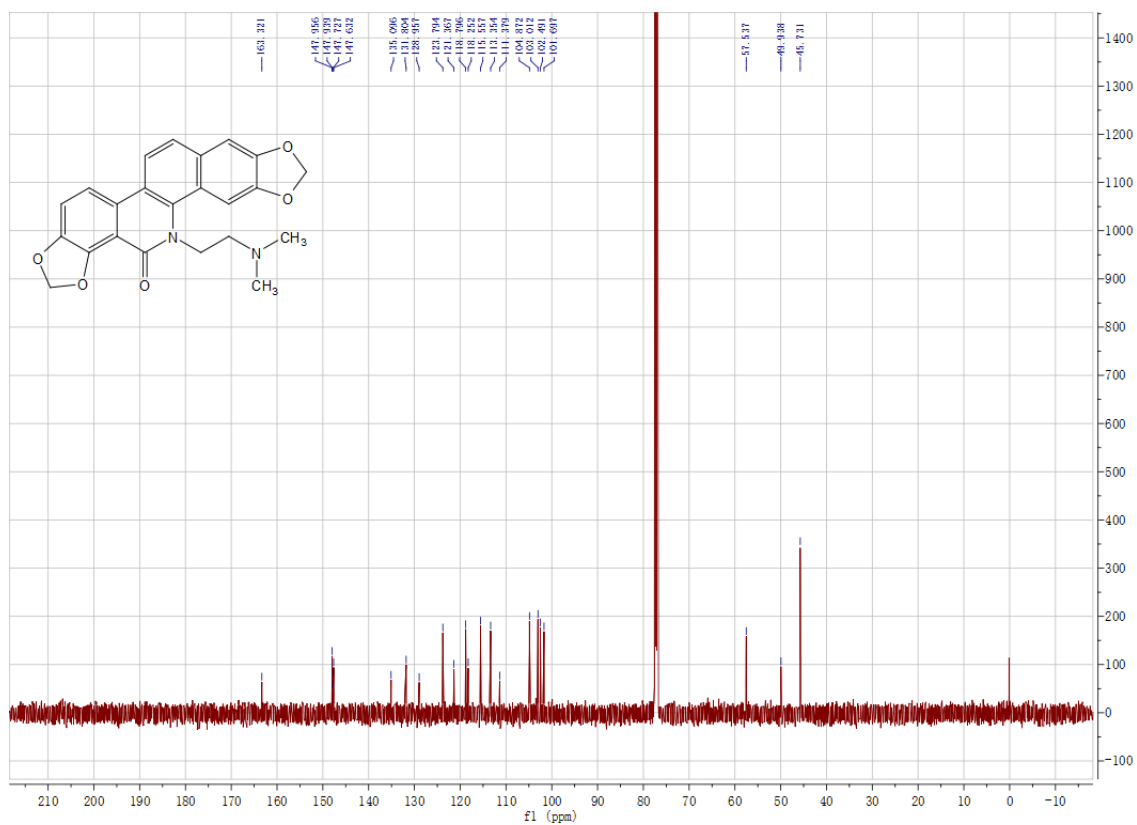

**<sup>1</sup>H NMR and <sup>13</sup>C NMR spectra of compound C10**

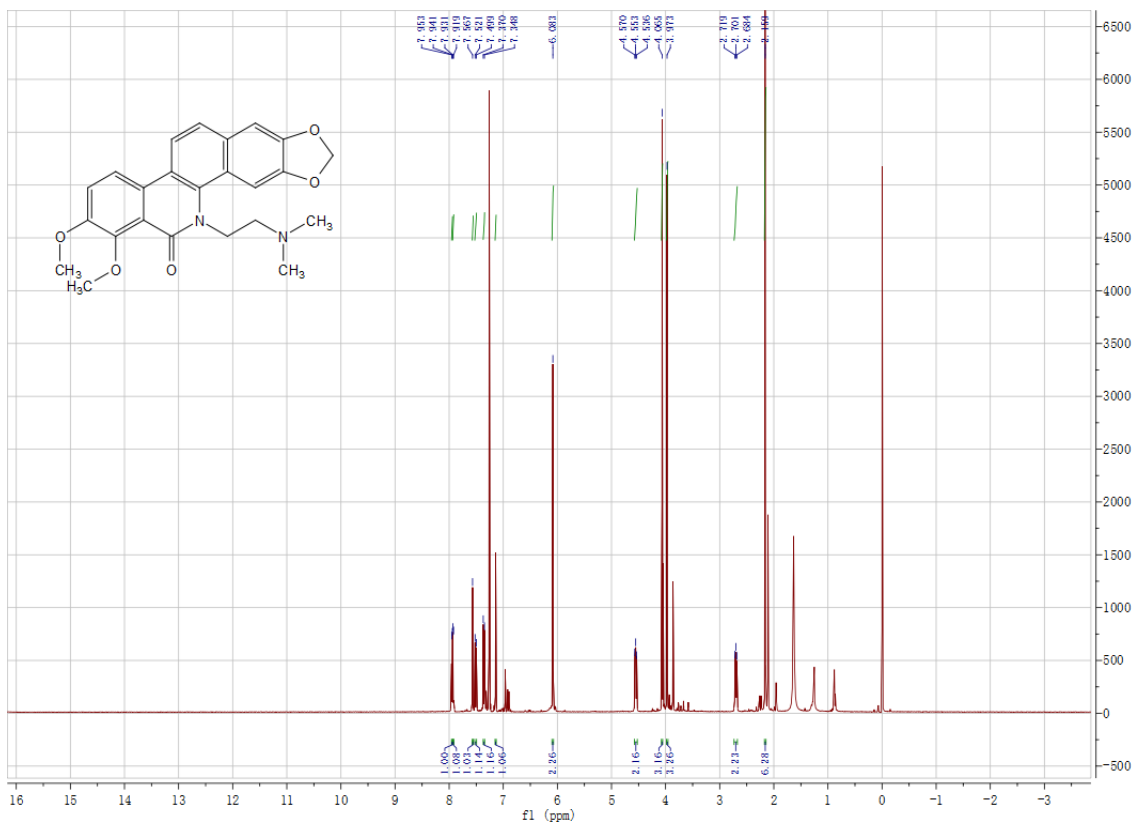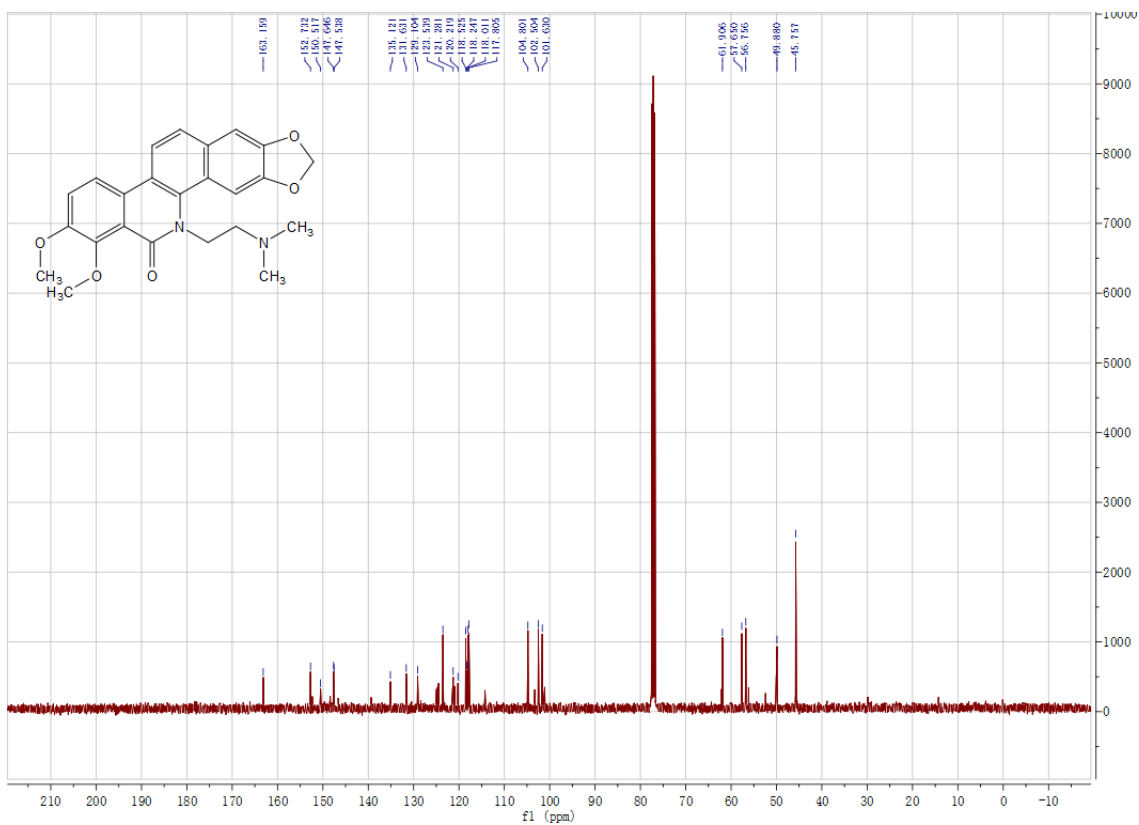

<sup>1</sup>H NMR and <sup>13</sup>C NMR spectra of compound C11

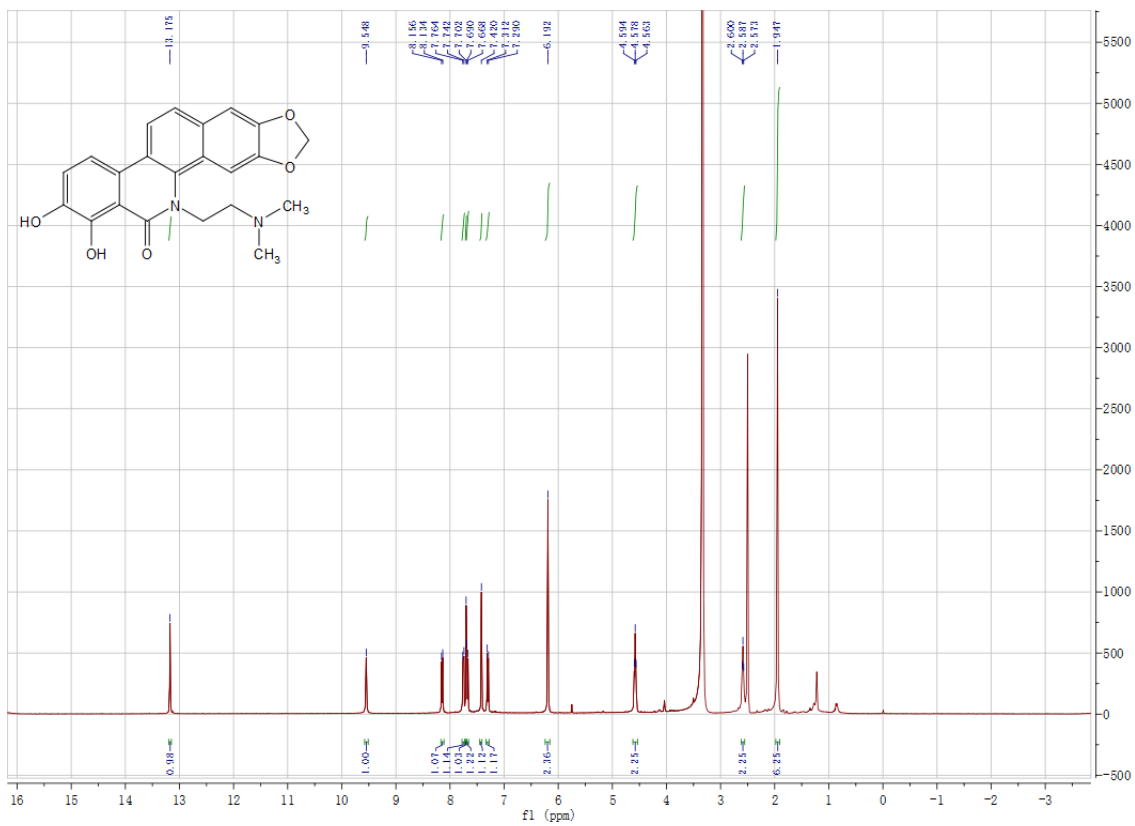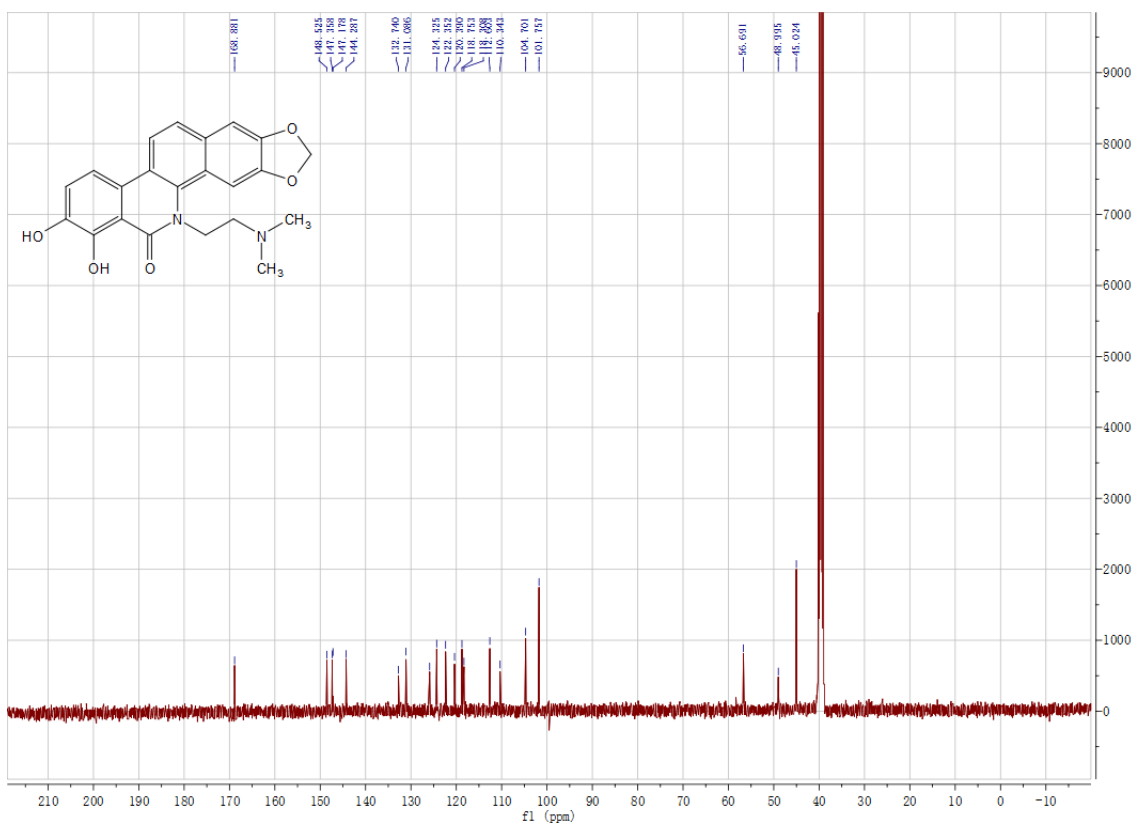

<sup>1</sup>H NMR and <sup>13</sup>C NMR spectra of compound C12

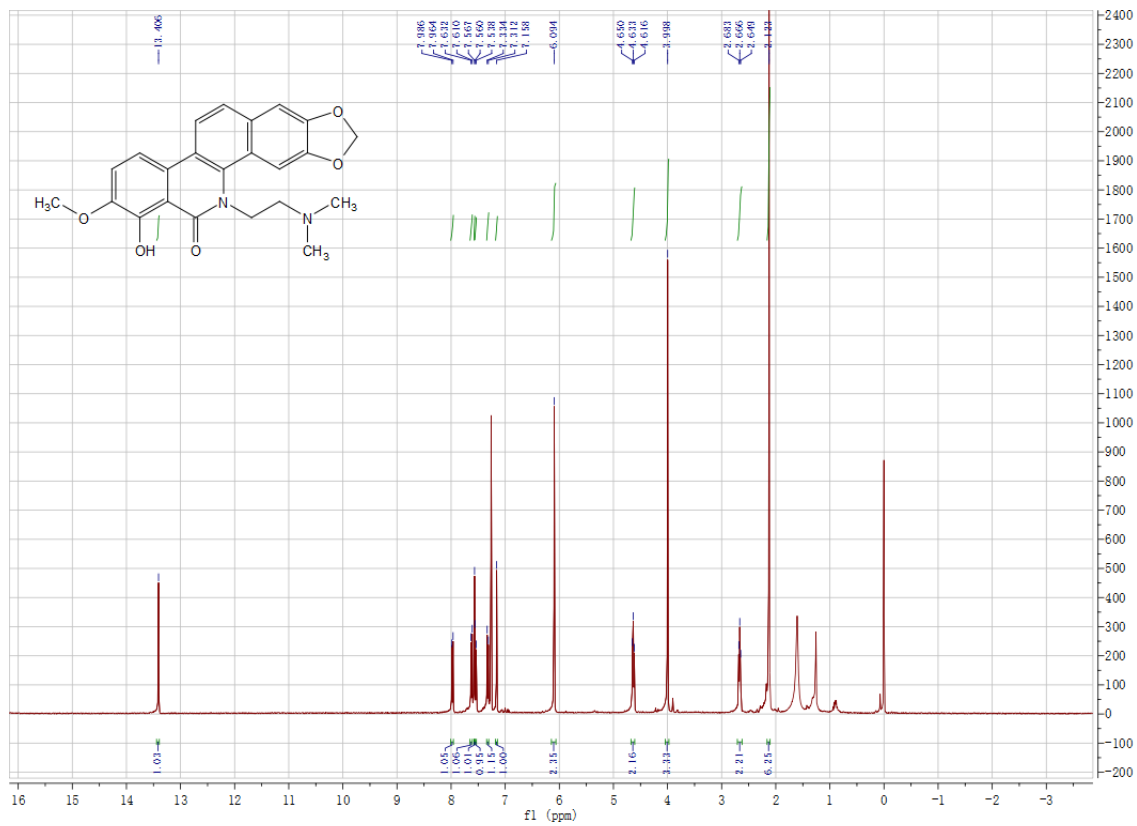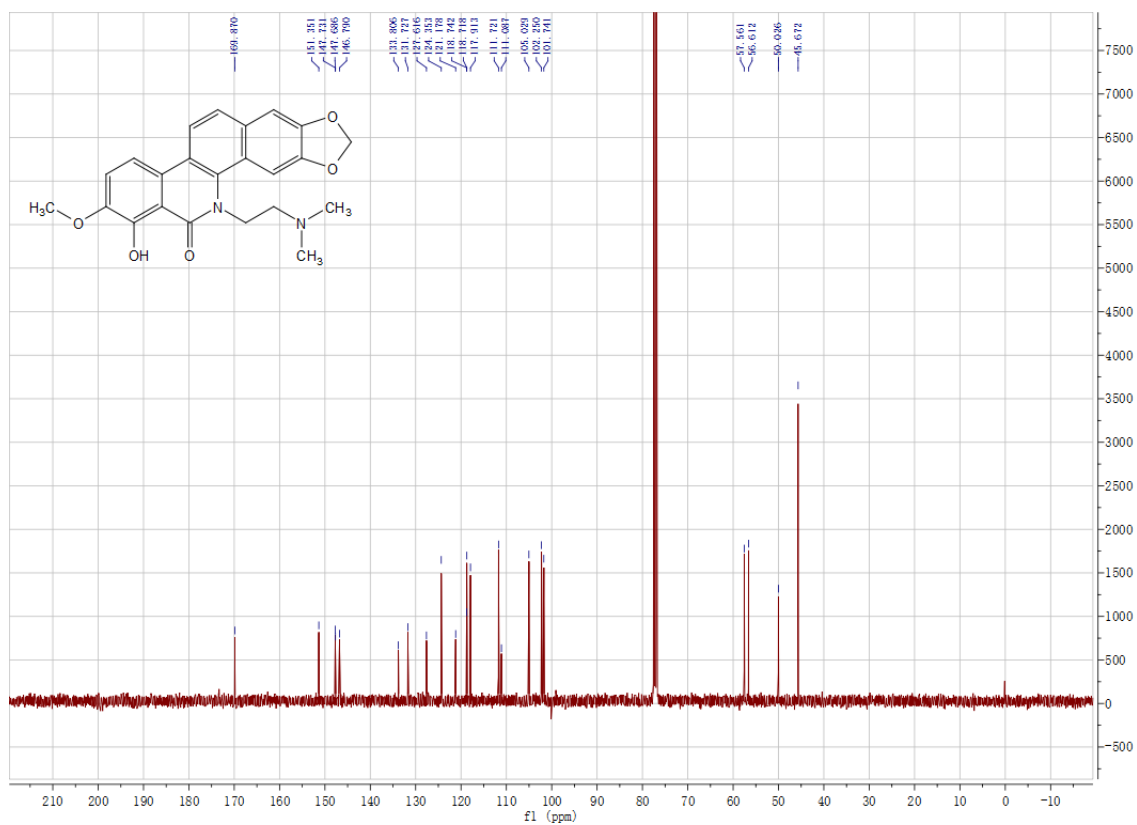

**<sup>1</sup>H NMR and <sup>13</sup>C NMR spectra of compound C13**



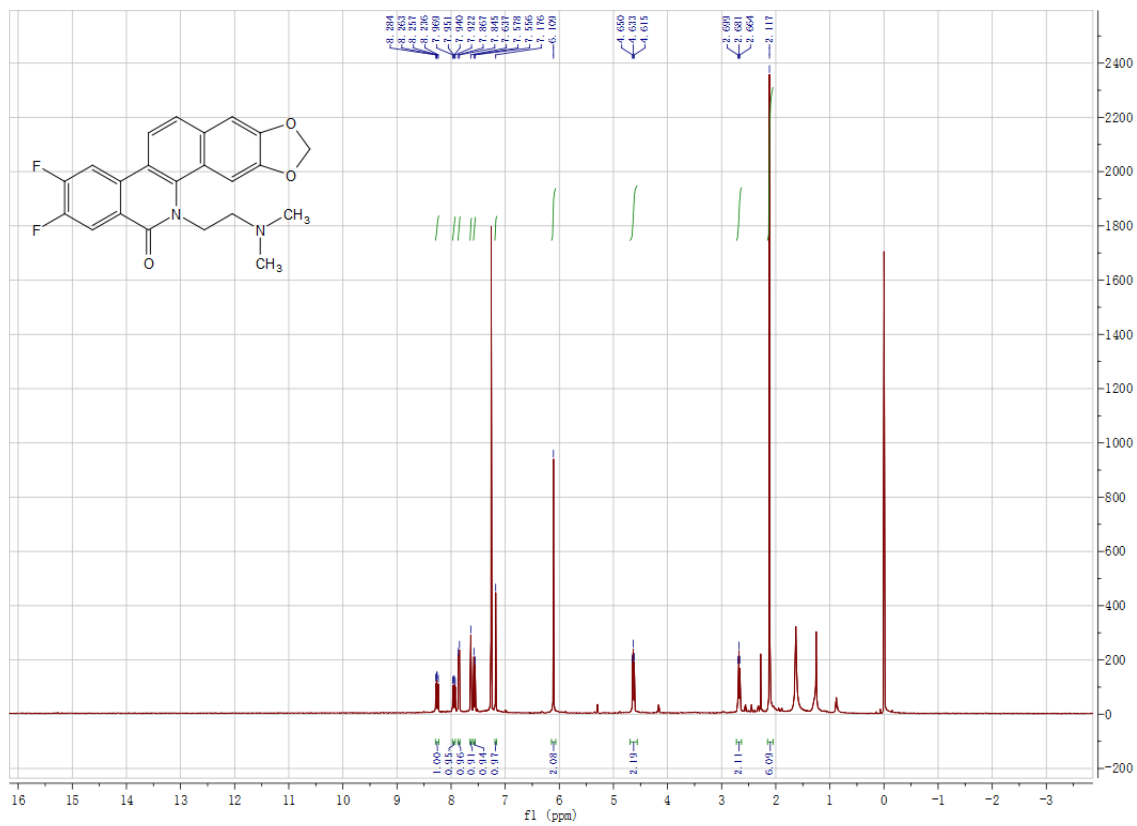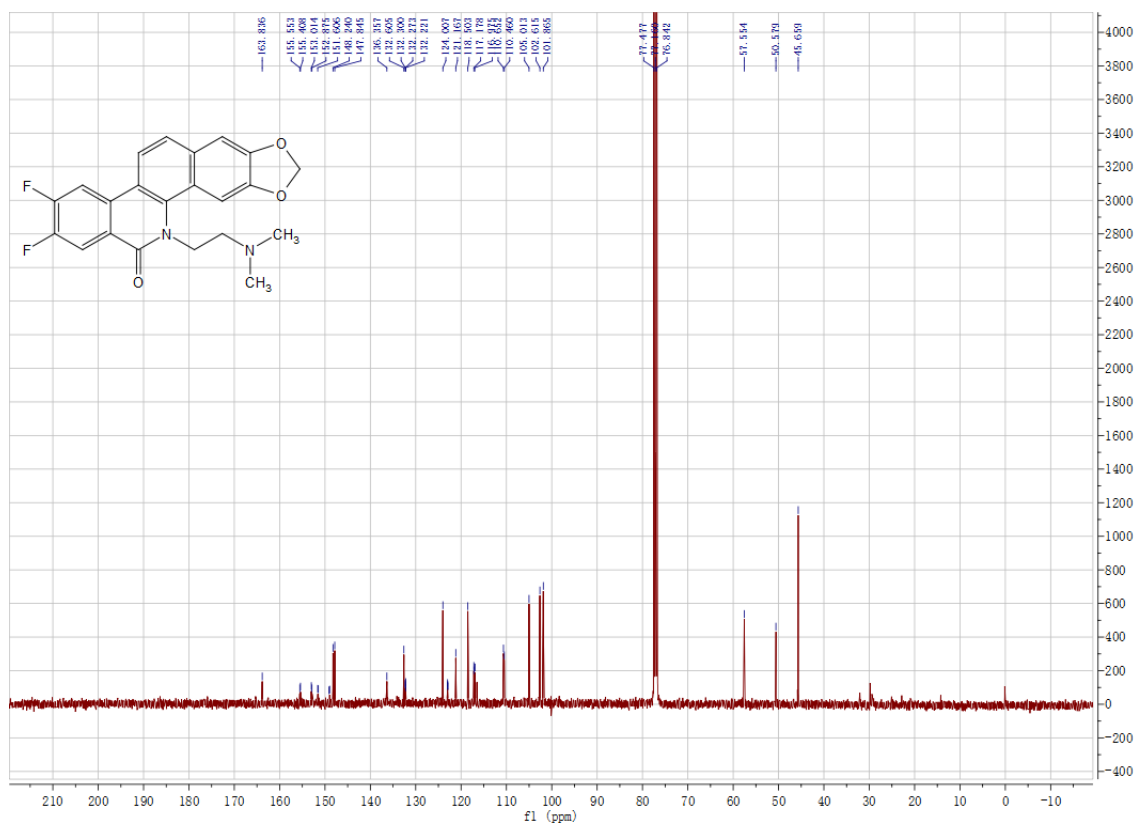

<sup>1</sup>H NMR and <sup>13</sup>C NMR spectra of compound C14



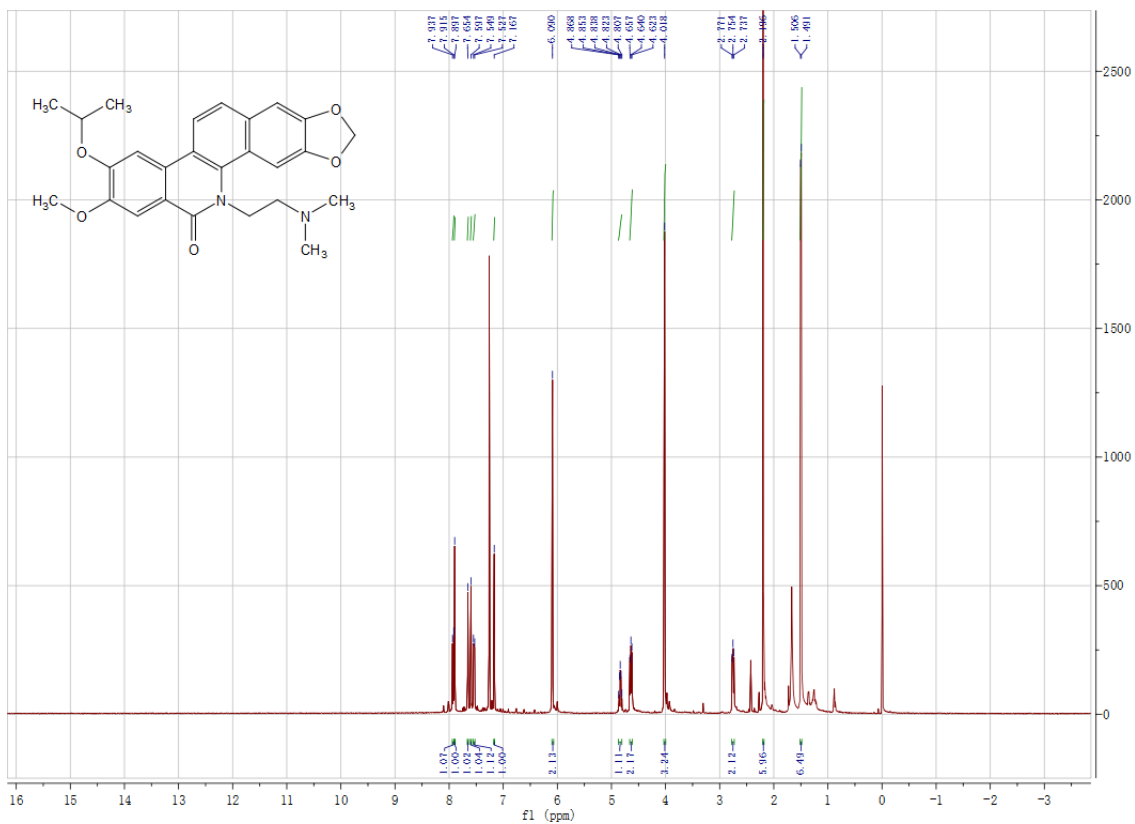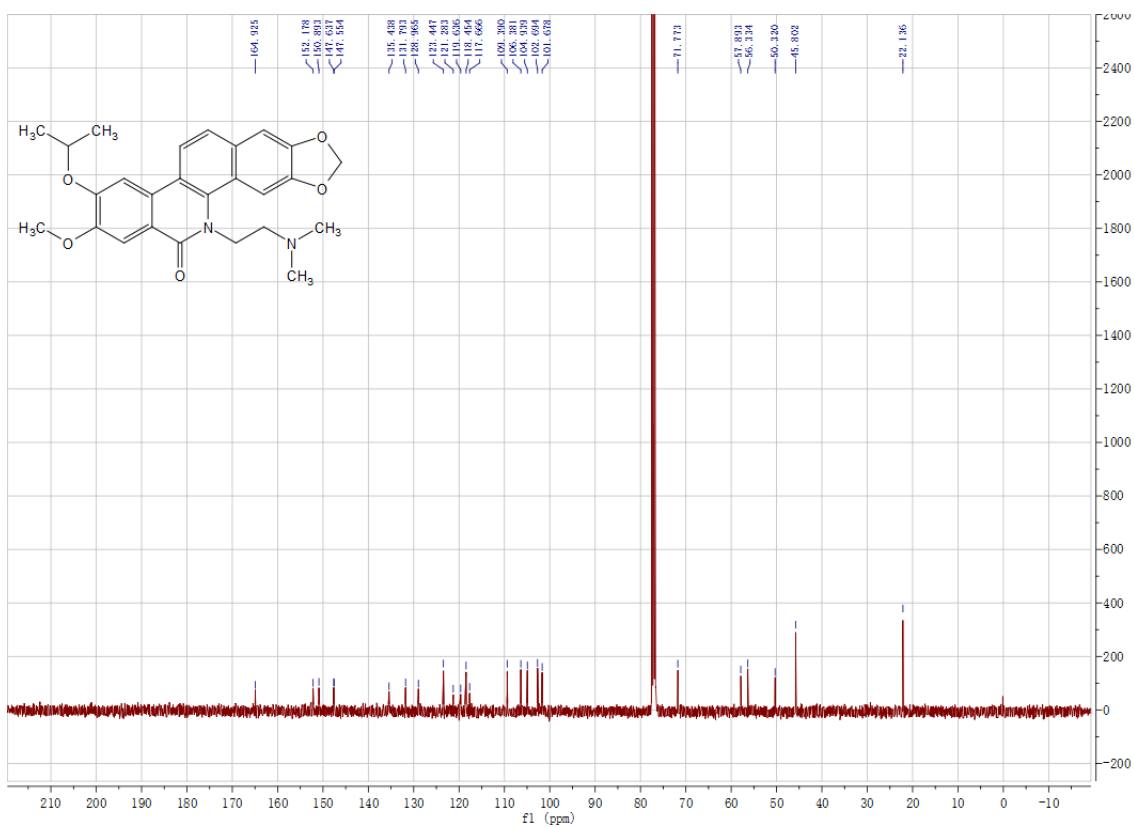

**<sup>1</sup>H NMR and <sup>13</sup>C NMR spectra of compound C16**

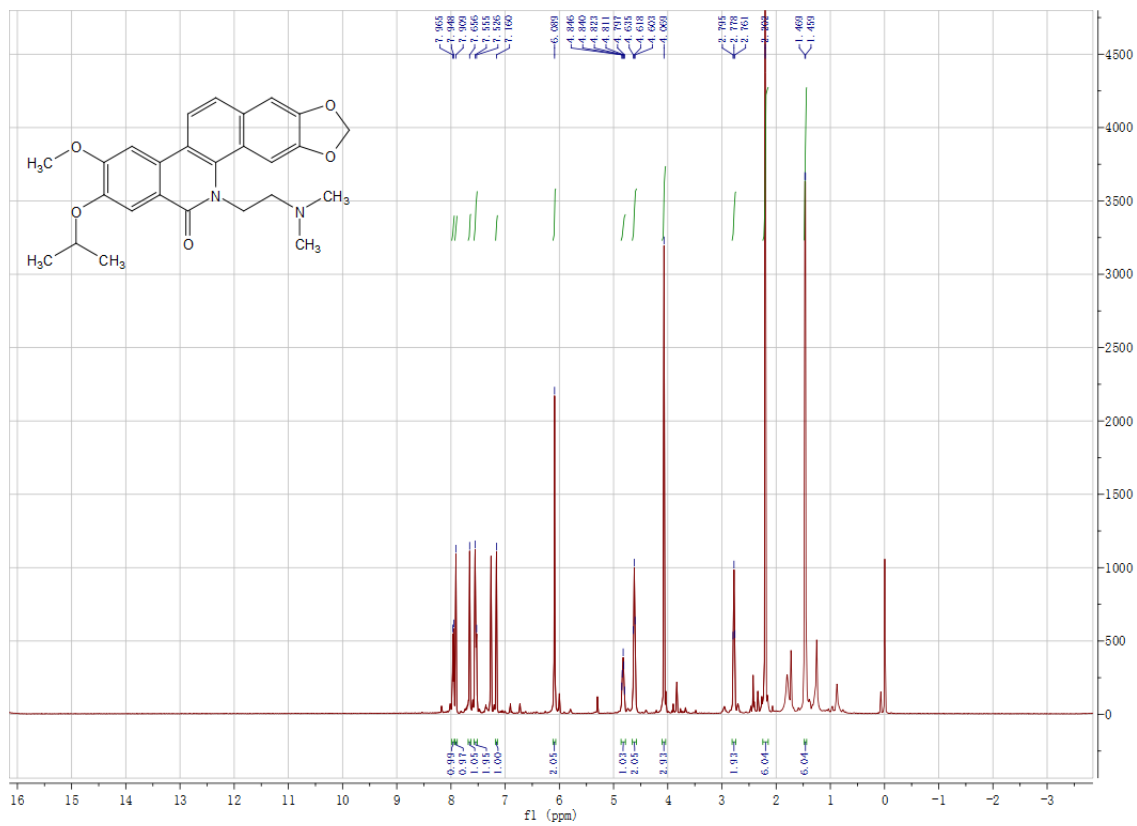

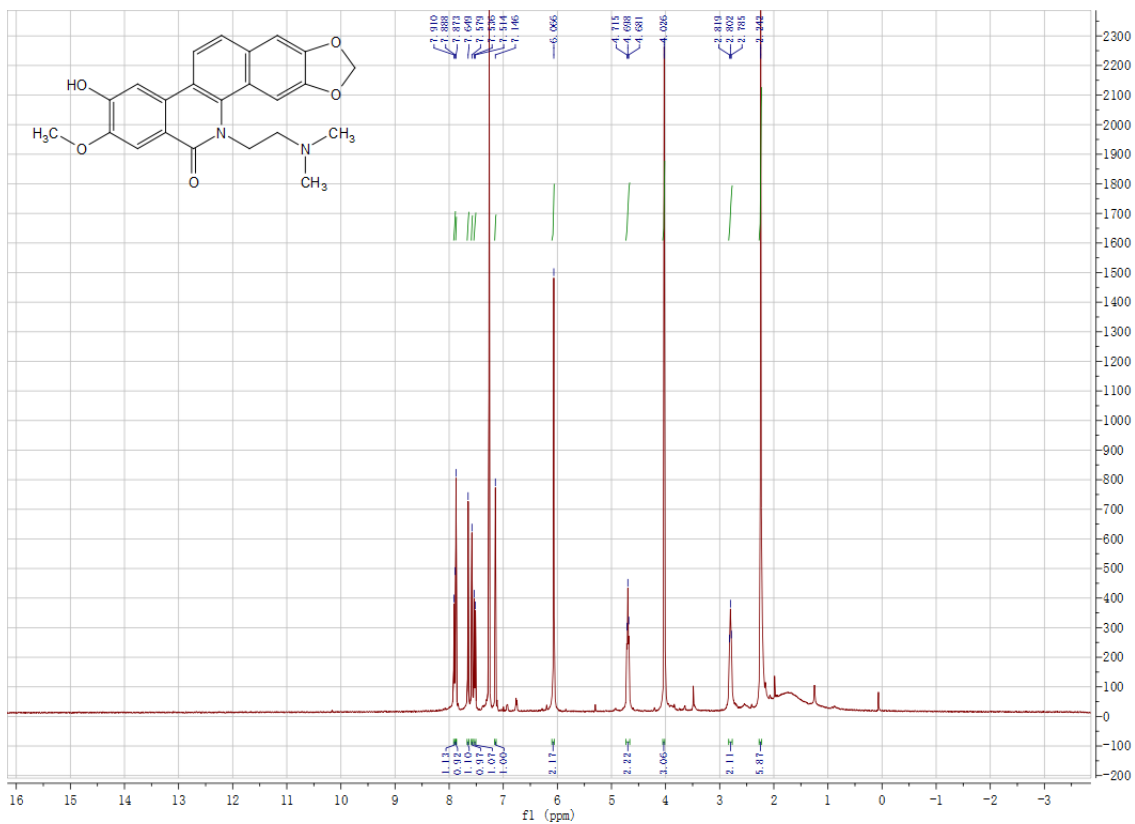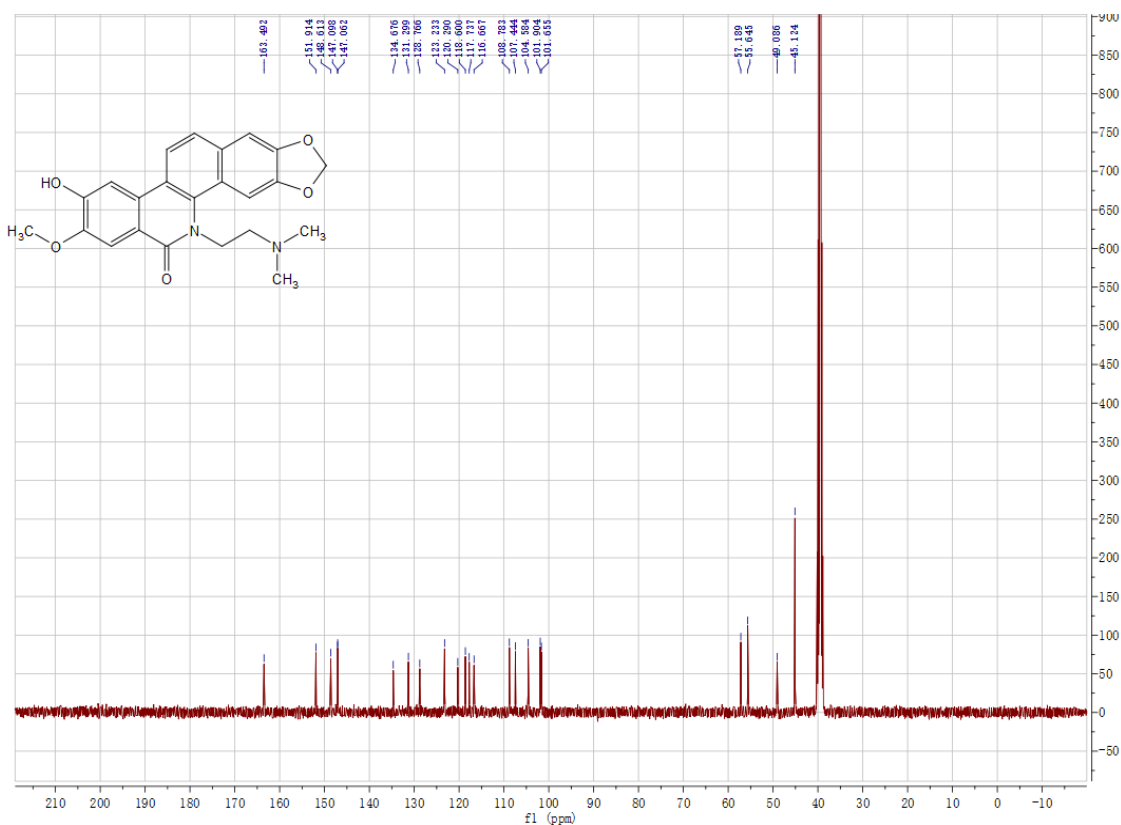

$^1\text{H}$  NMR and  $^{13}\text{C}$  NMR spectra of compound C18

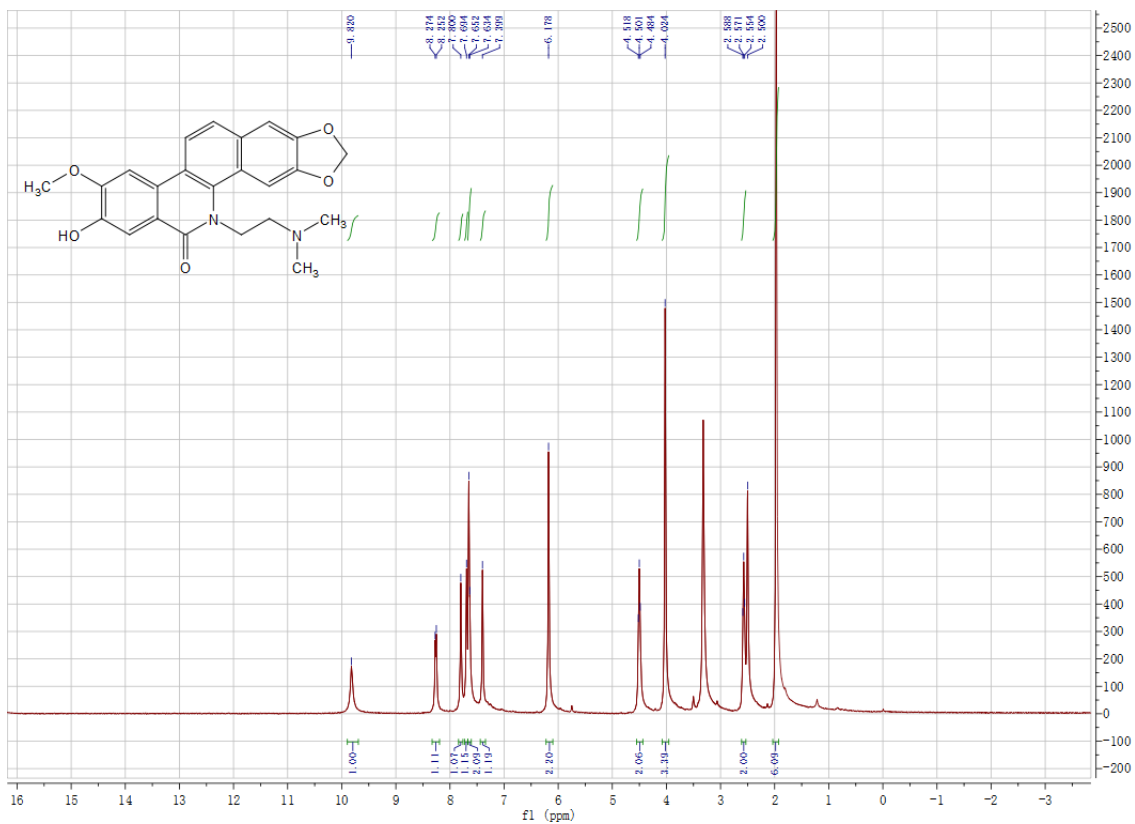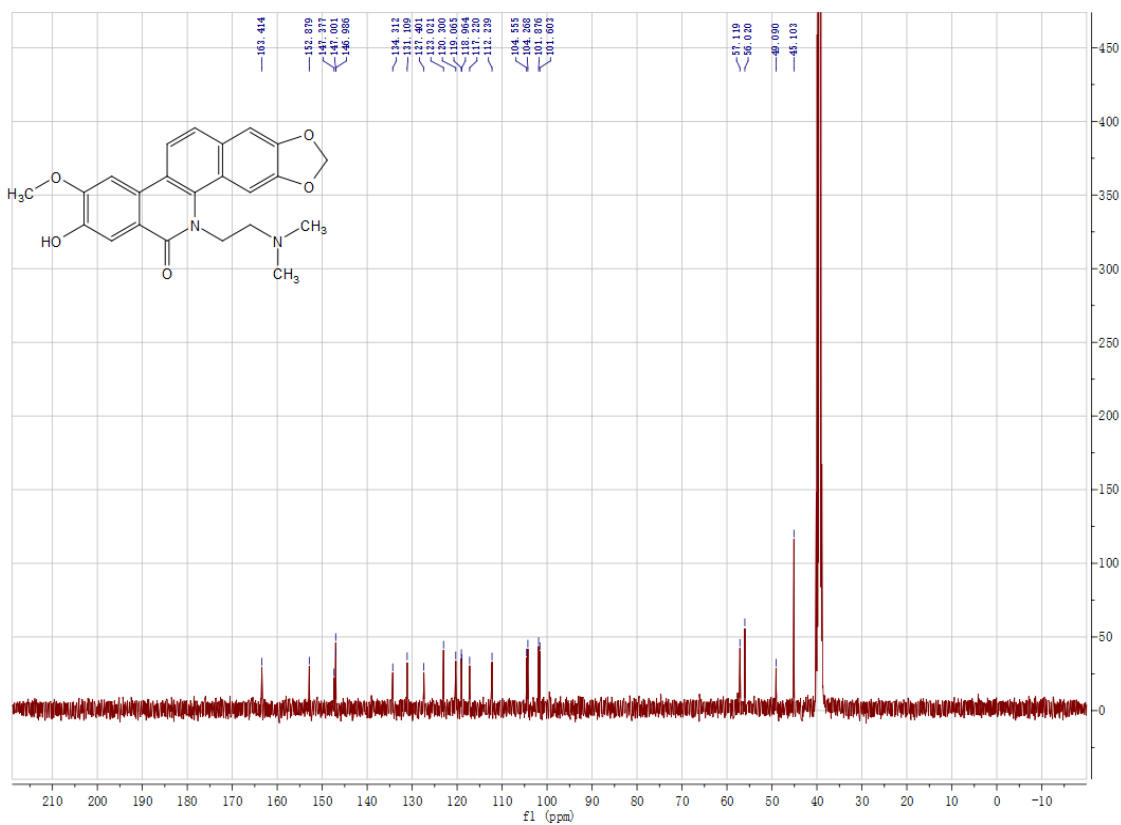

**<sup>1</sup>H NMR and <sup>13</sup>C NMR spectra of compound C19**

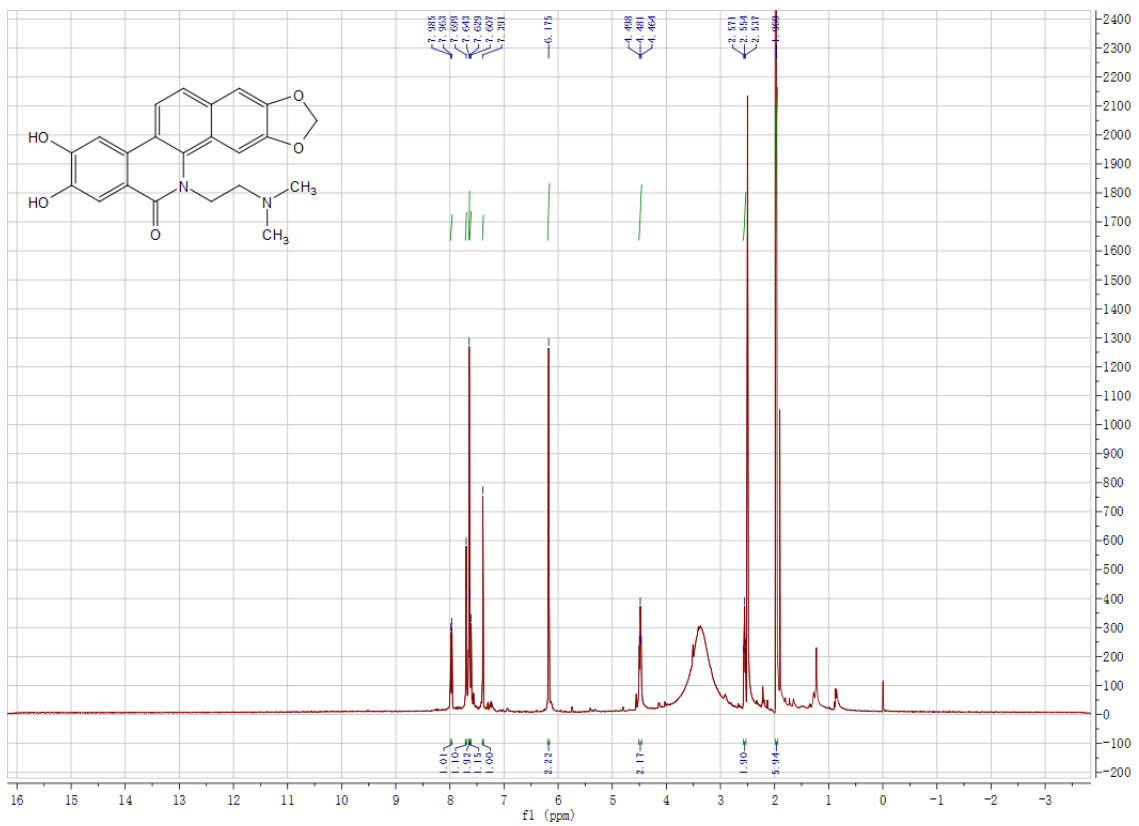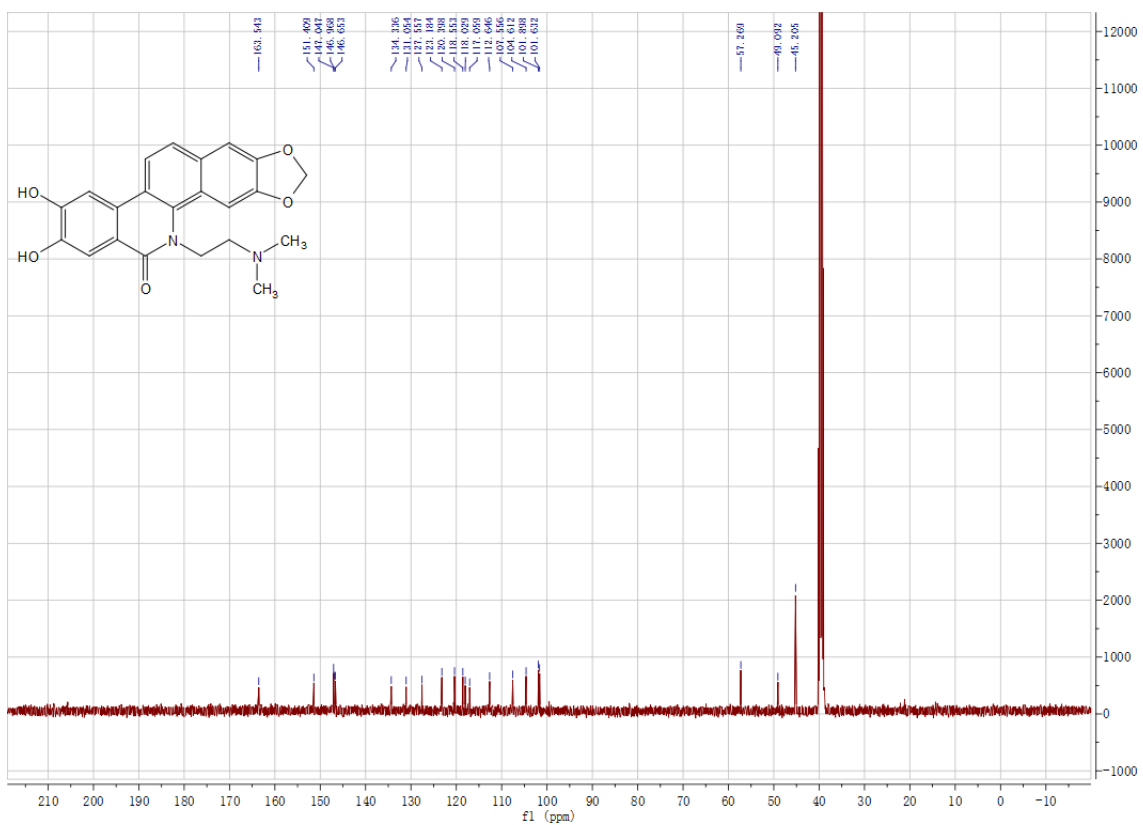

<sup>1</sup>H NMR and <sup>13</sup>C NMR spectra of compound C20

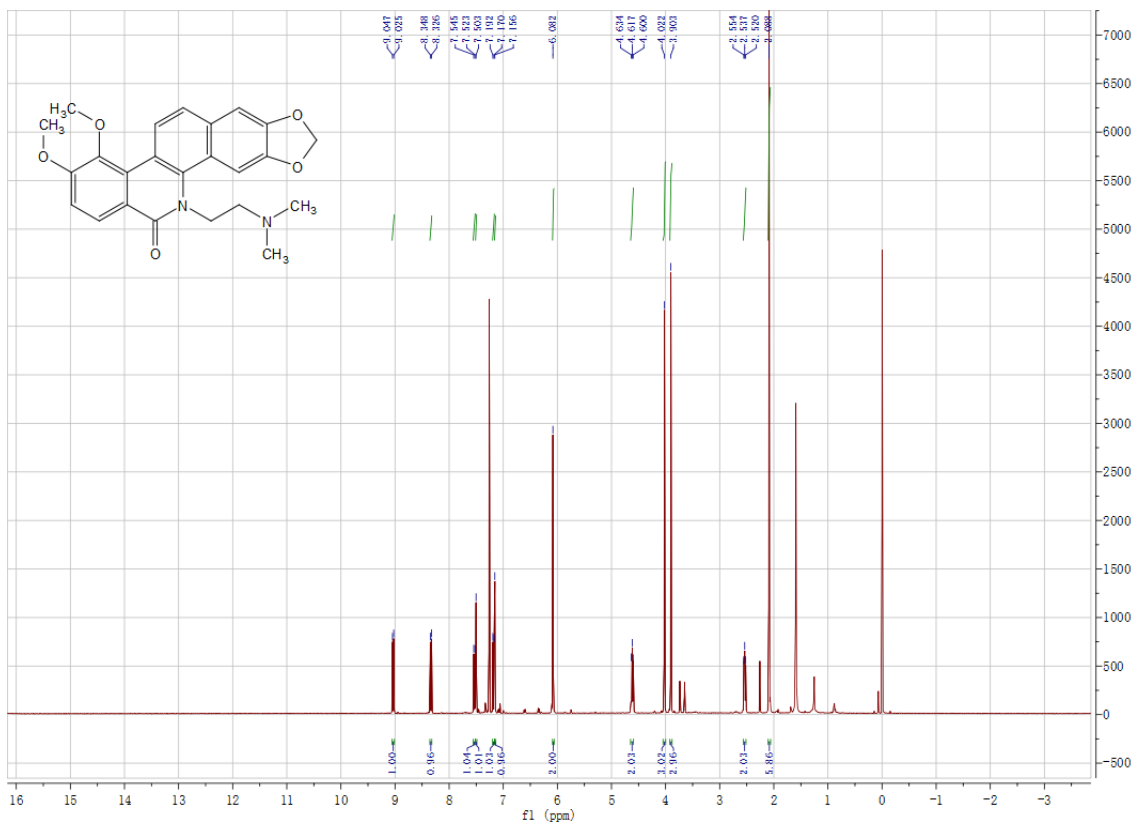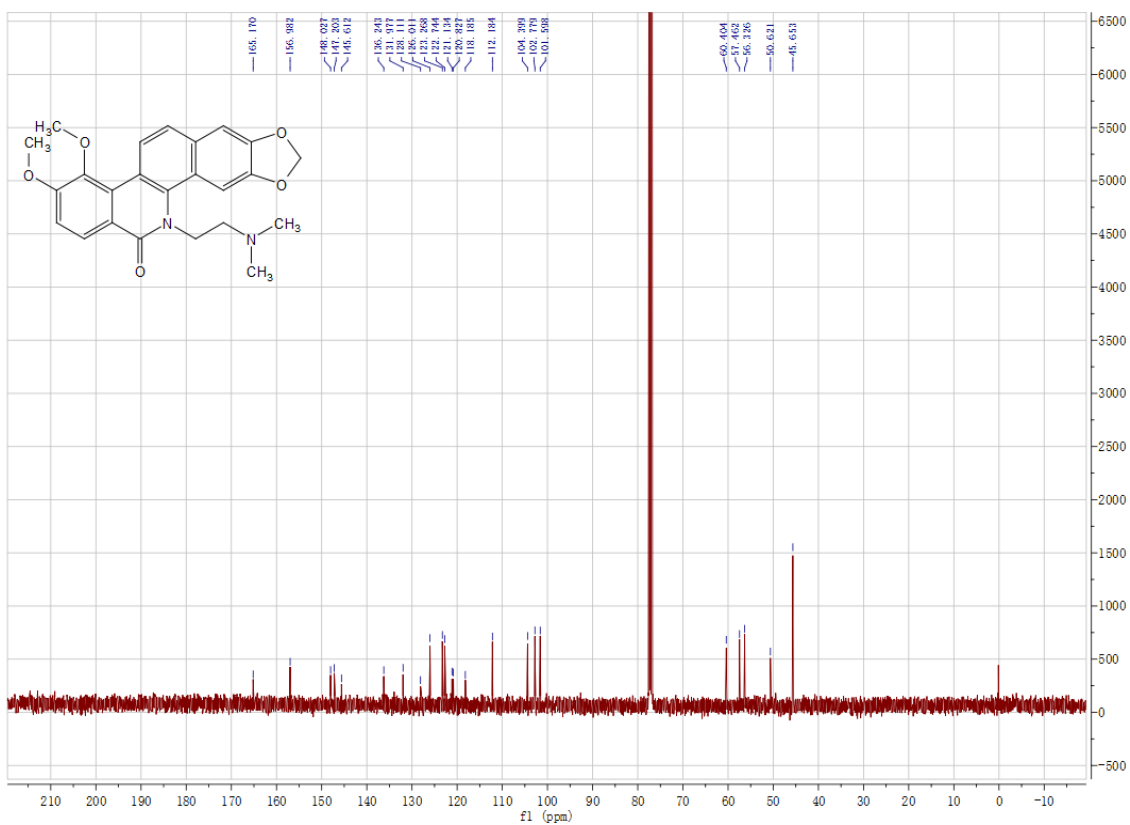

<sup>1</sup>H NMR and <sup>13</sup>C NMR spectra of compound C21



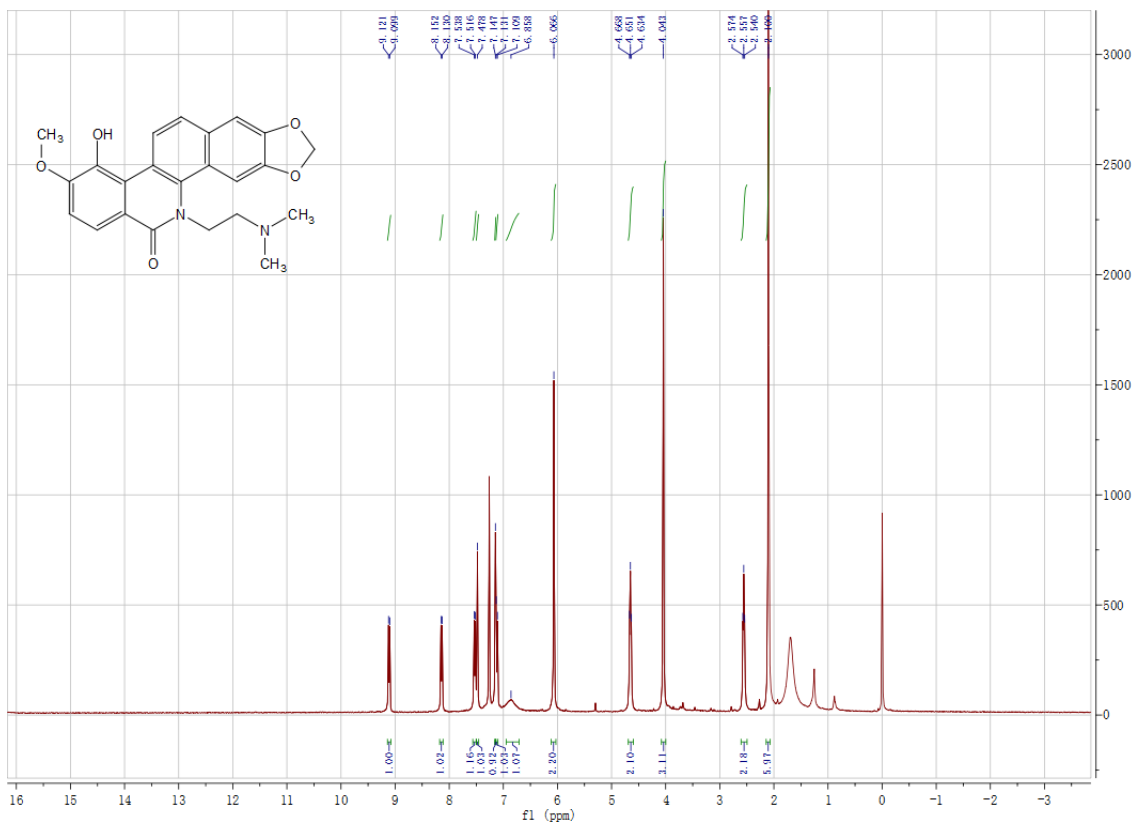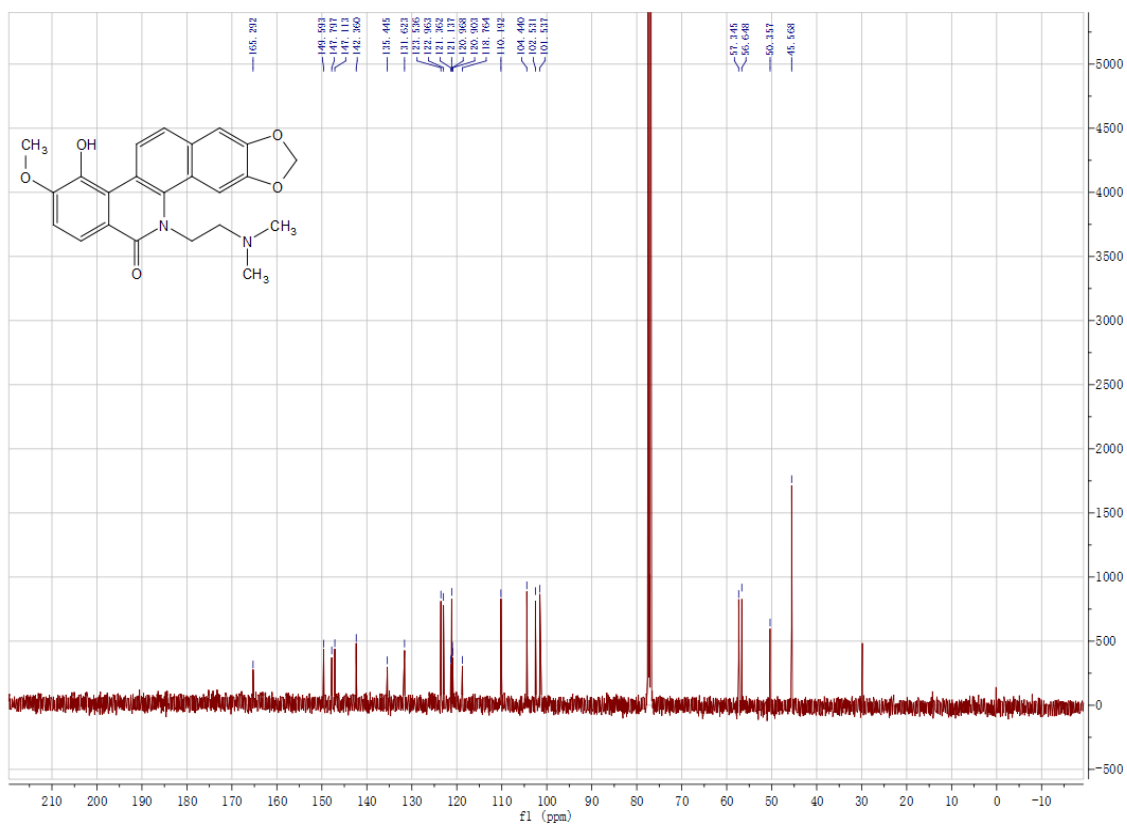

<sup>1</sup>H NMR and <sup>13</sup>C NMR spectra of compound C22

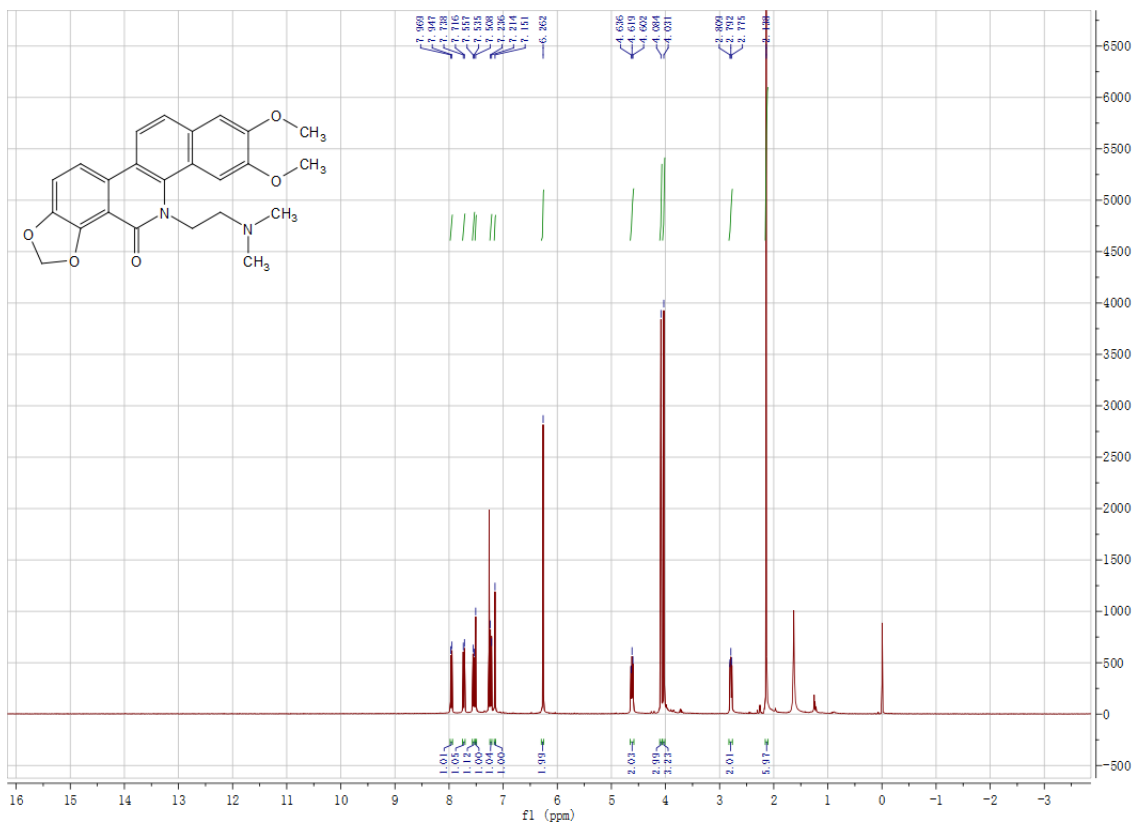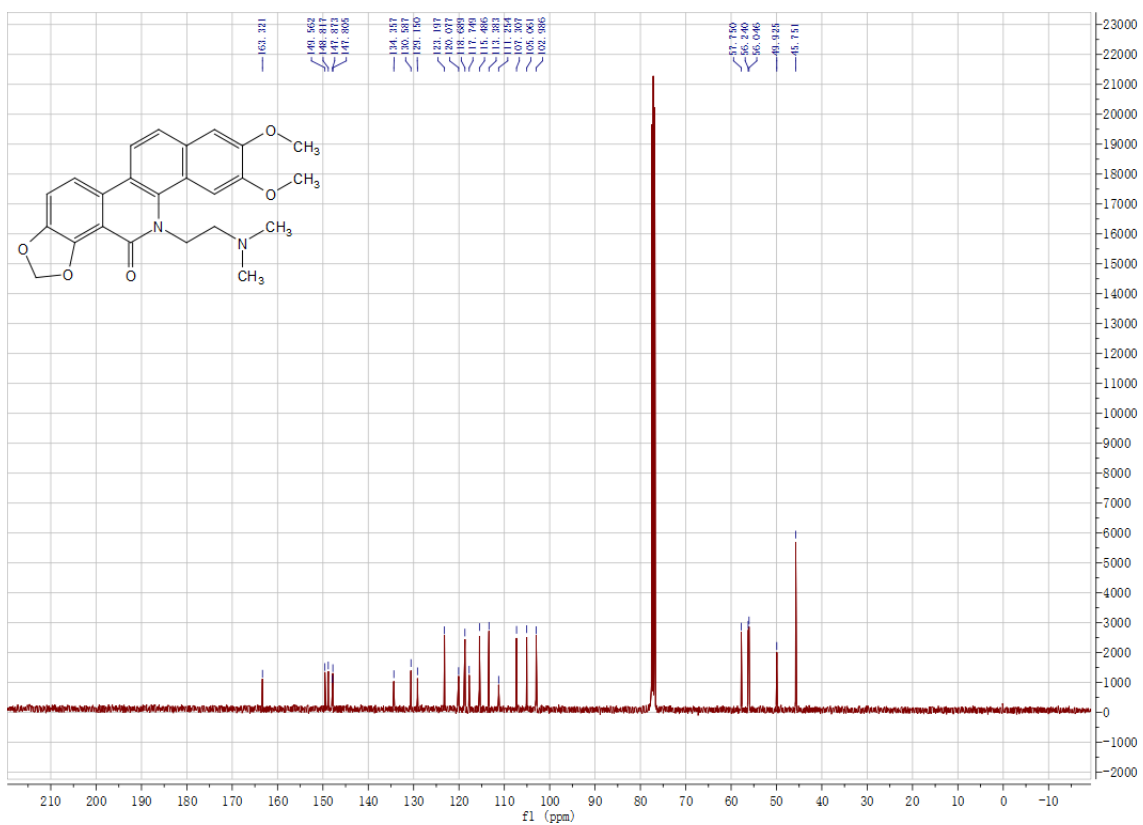

<sup>1</sup>H NMR and <sup>13</sup>C NMR spectra of compound C23

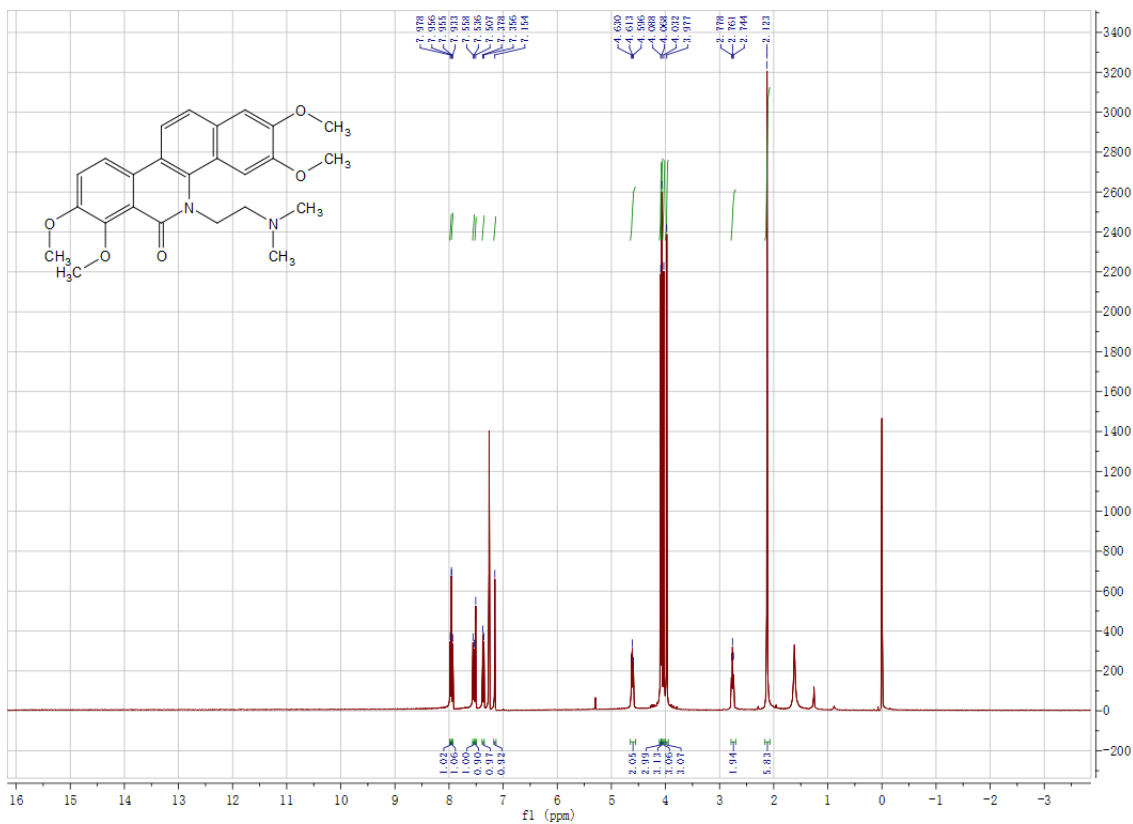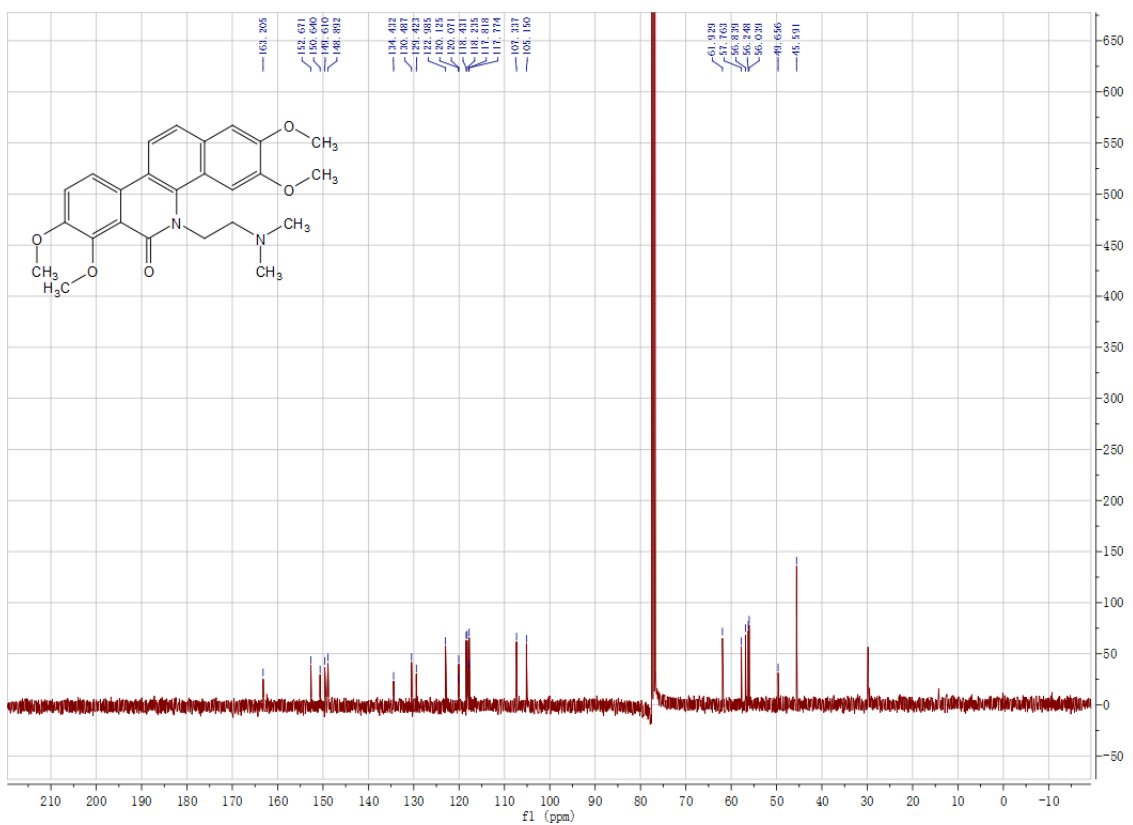

<sup>1</sup>H NMR and <sup>13</sup>C NMR spectra of compound C24

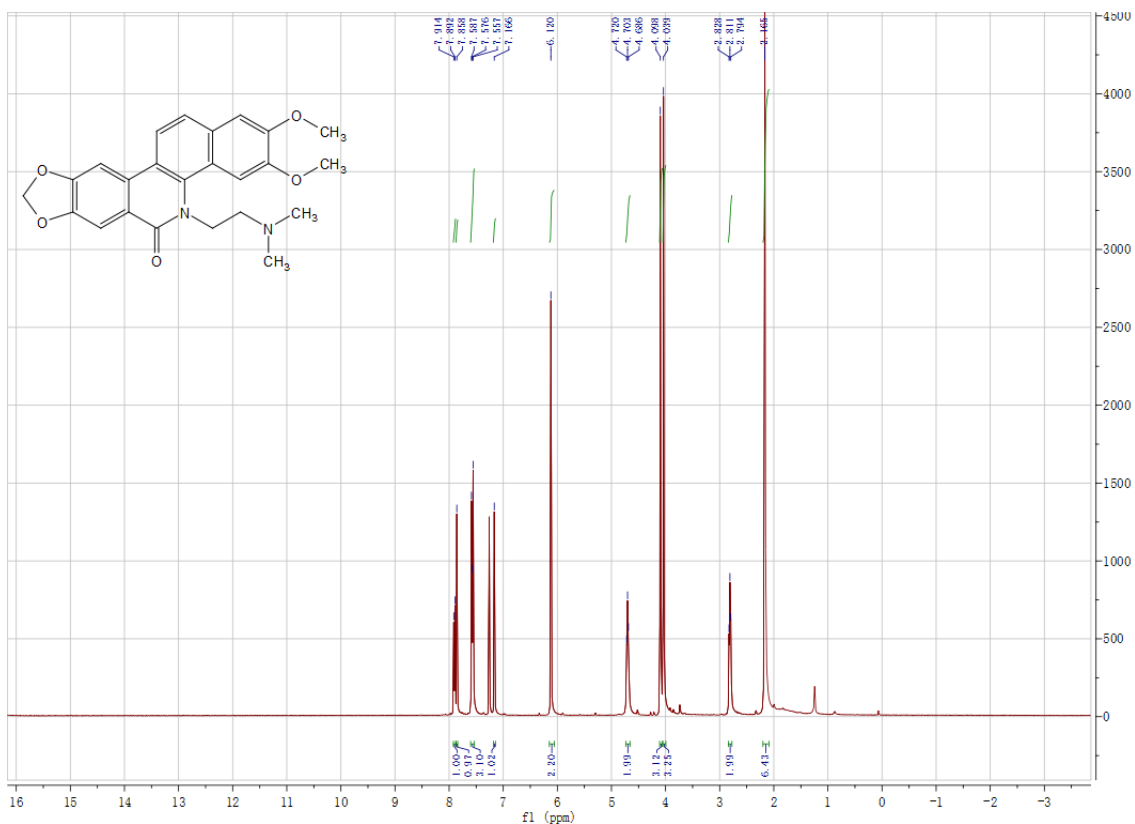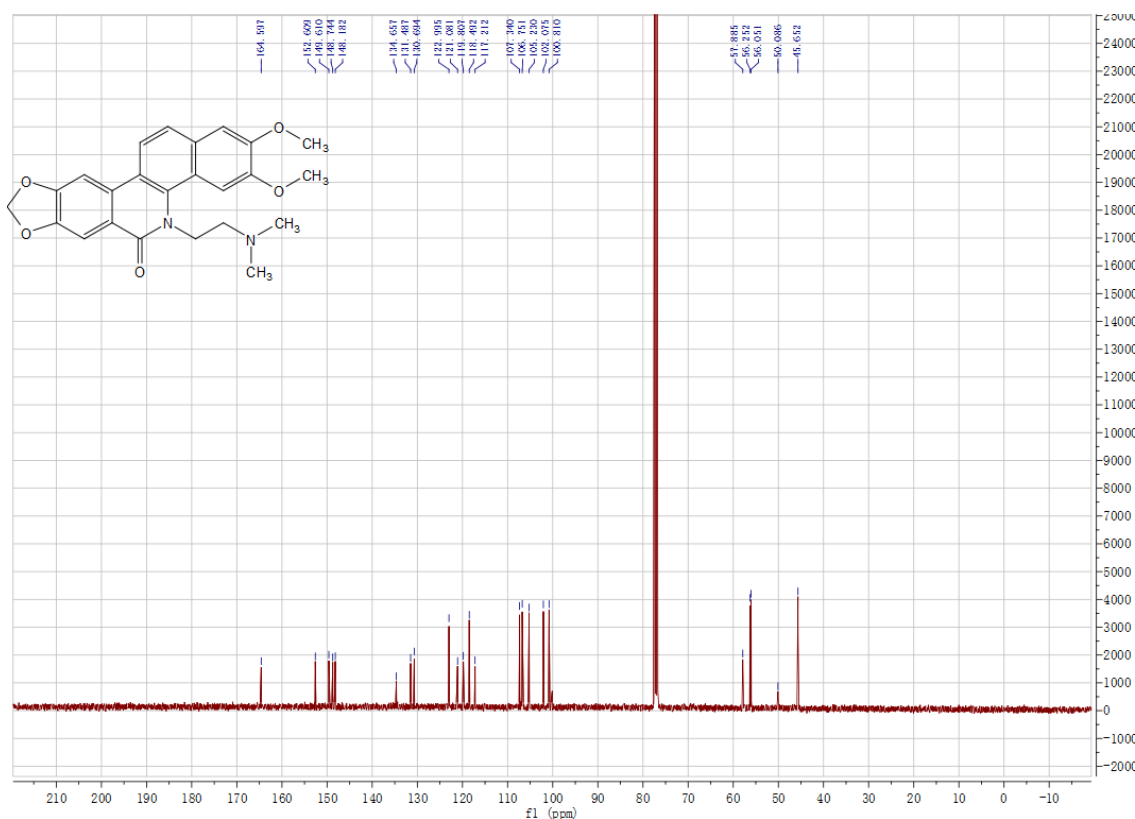

<sup>1</sup>H NMR and <sup>13</sup>C NMR spectra of compound C25

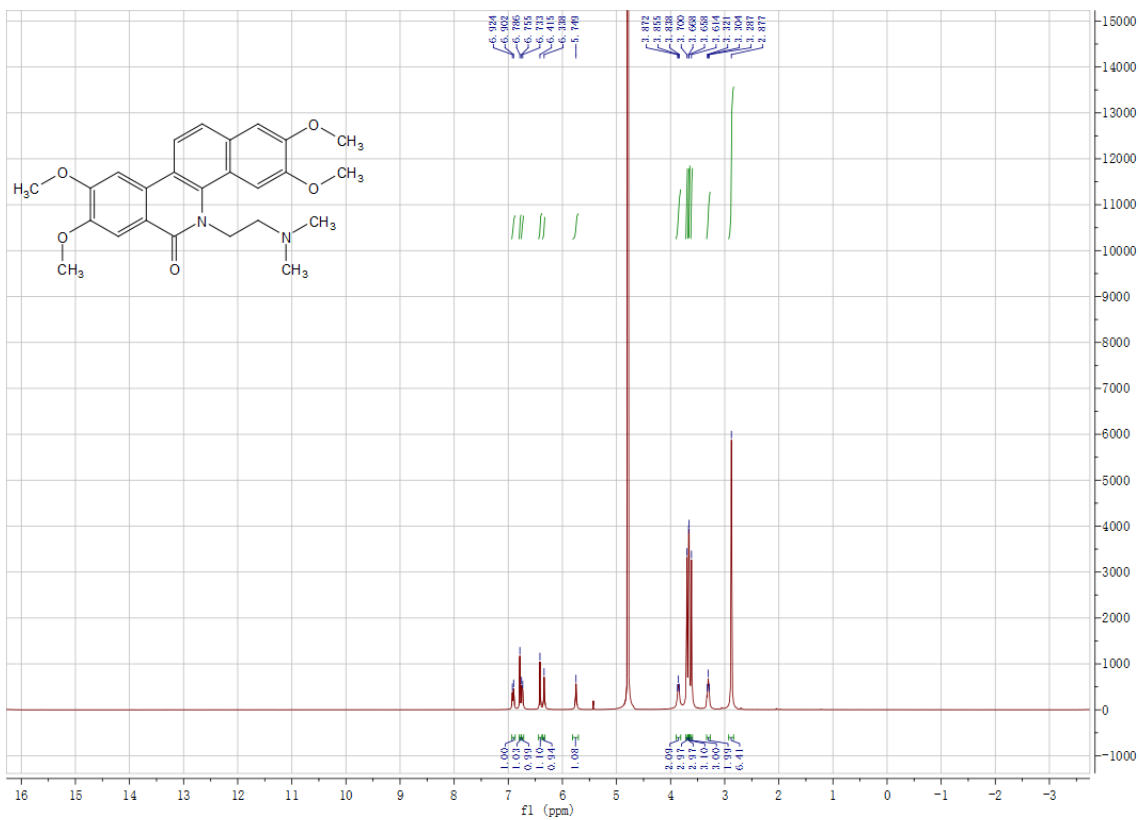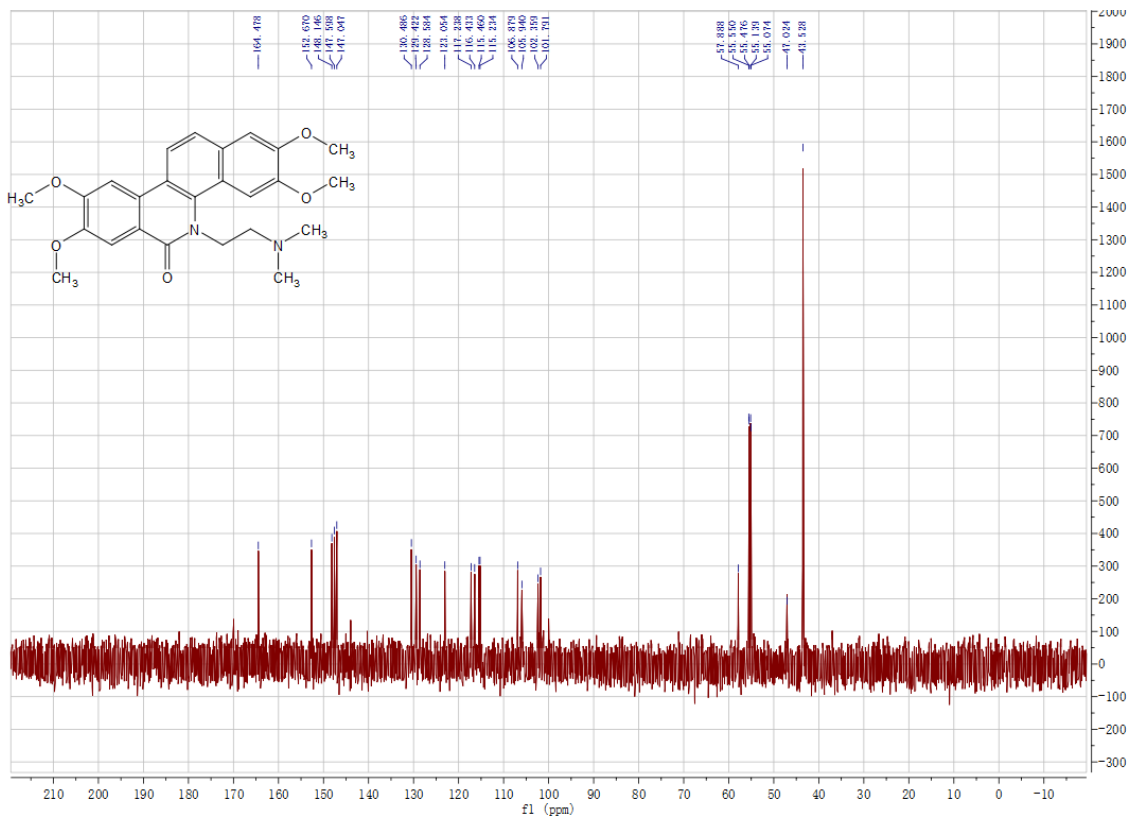

<sup>1</sup>H NMR and <sup>13</sup>C NMR spectra of compound C26

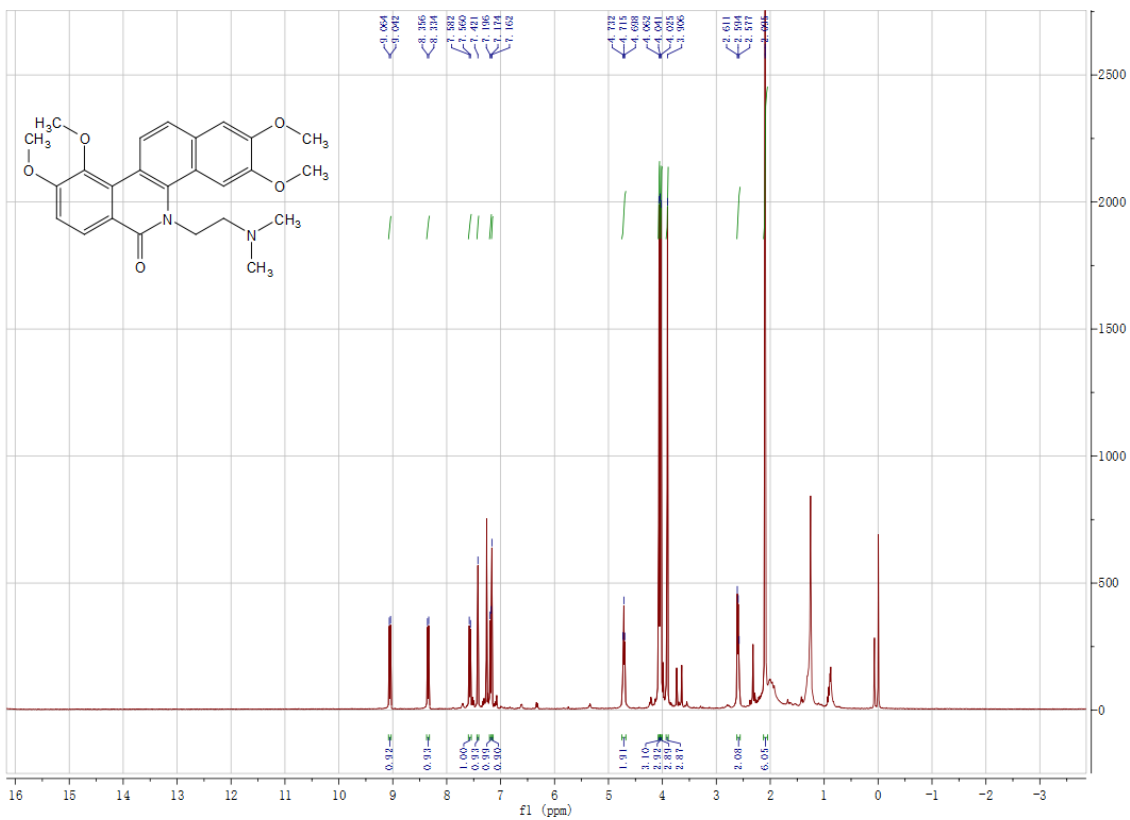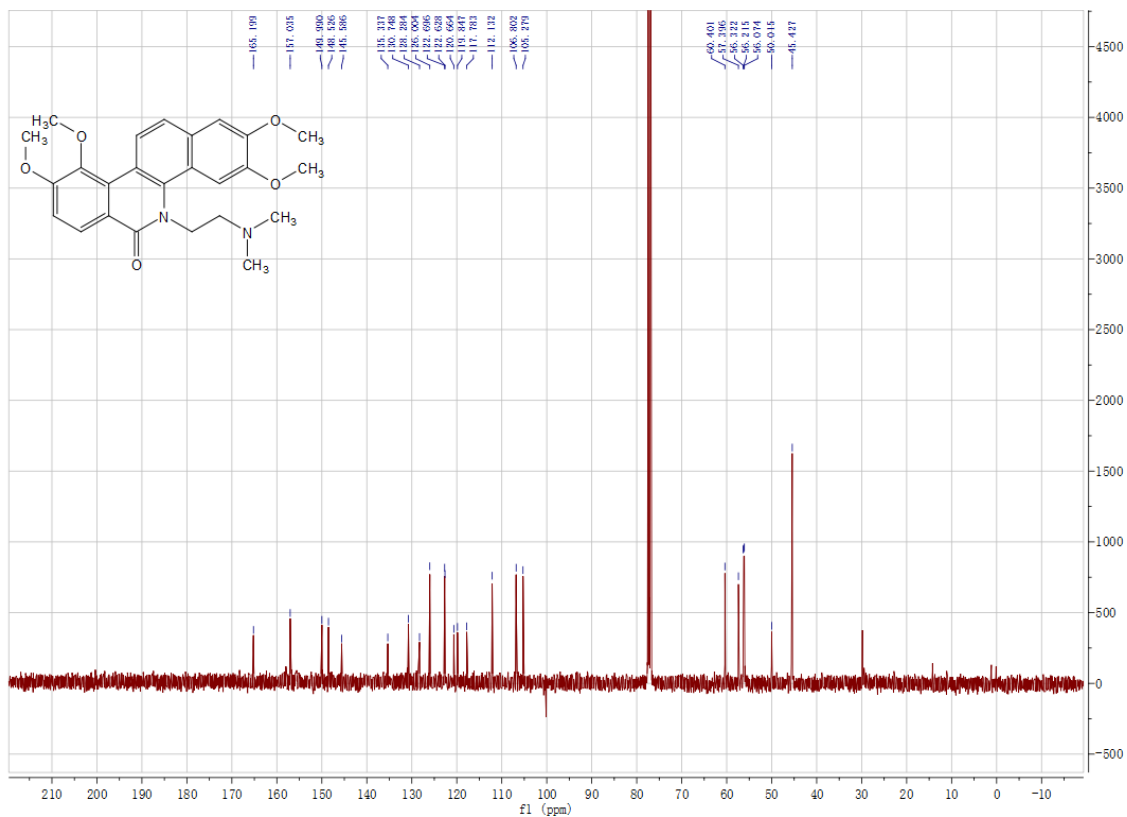

<sup>1</sup>H NMR and <sup>13</sup>C NMR spectra of compound C27



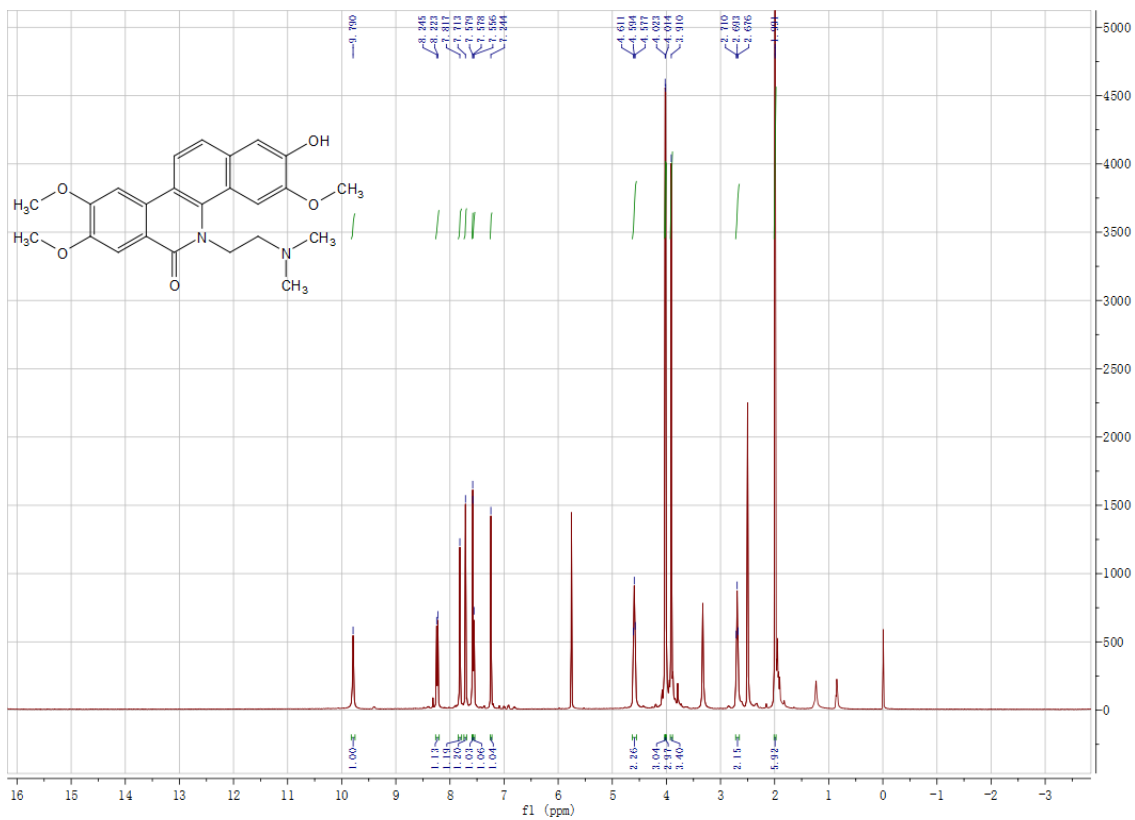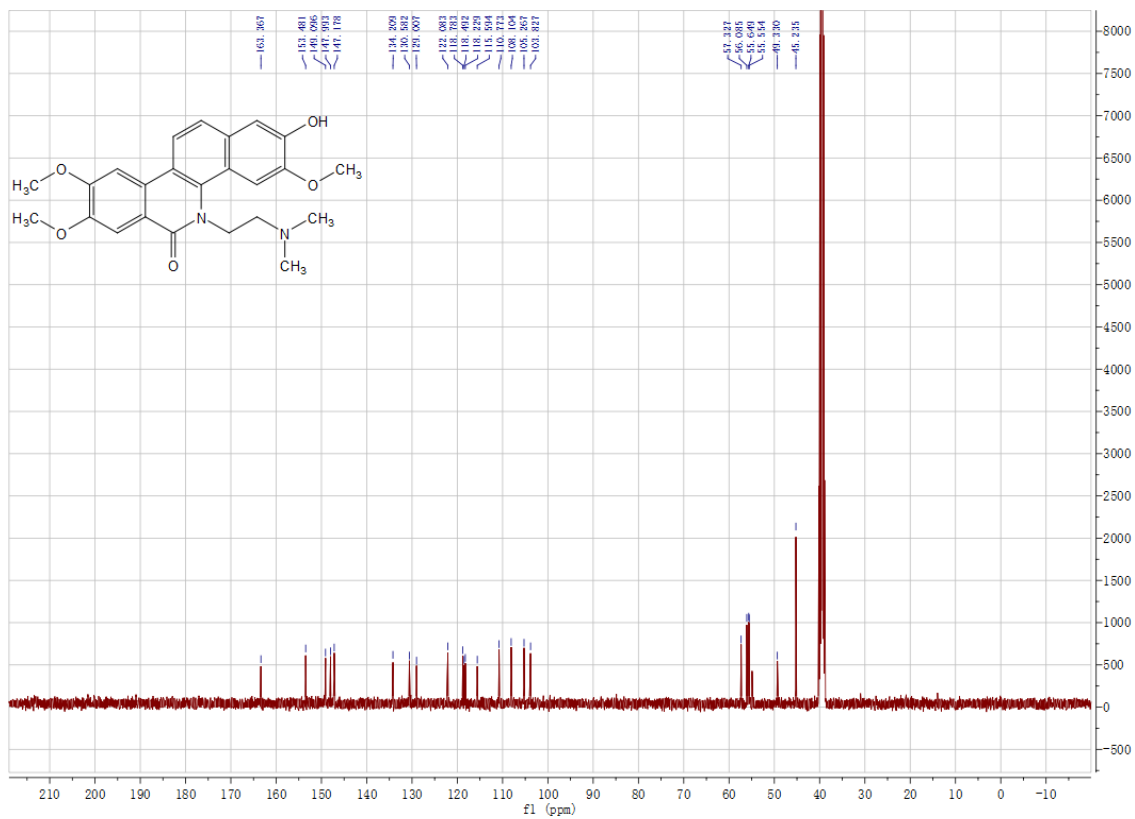

<sup>1</sup>H NMR and <sup>13</sup>C NMR spectra of compound C29



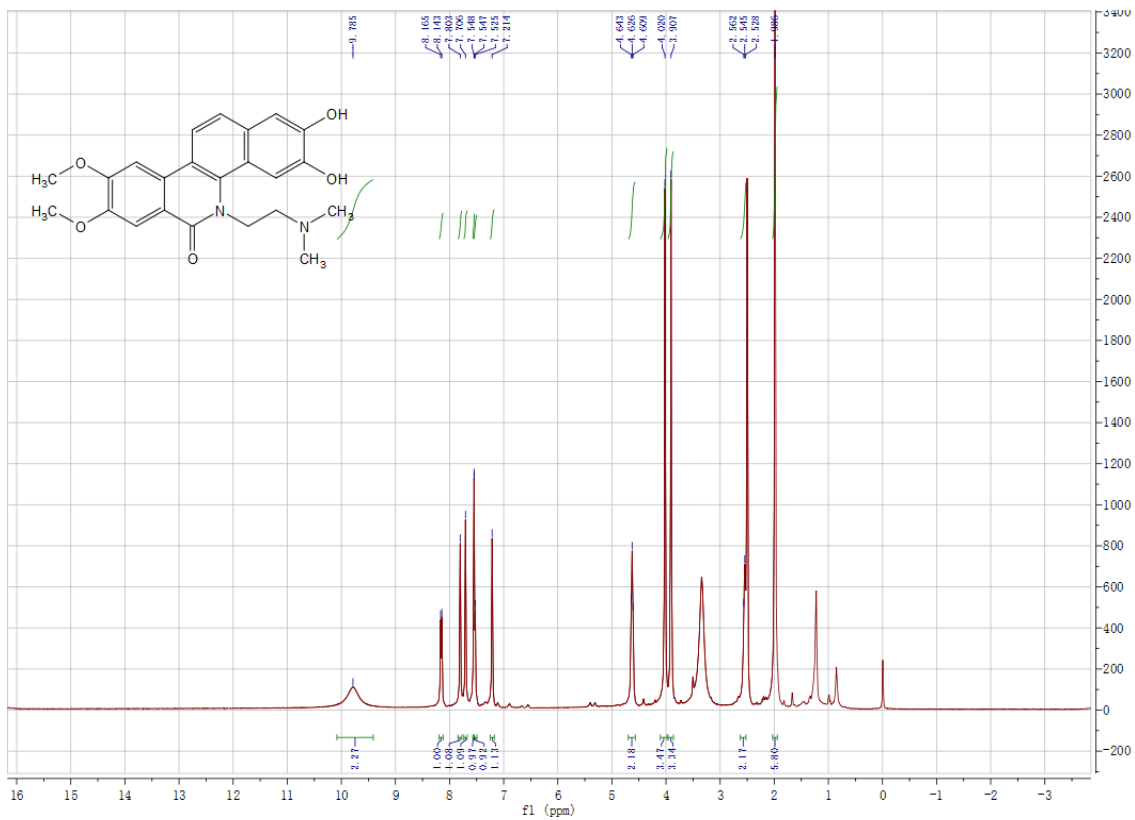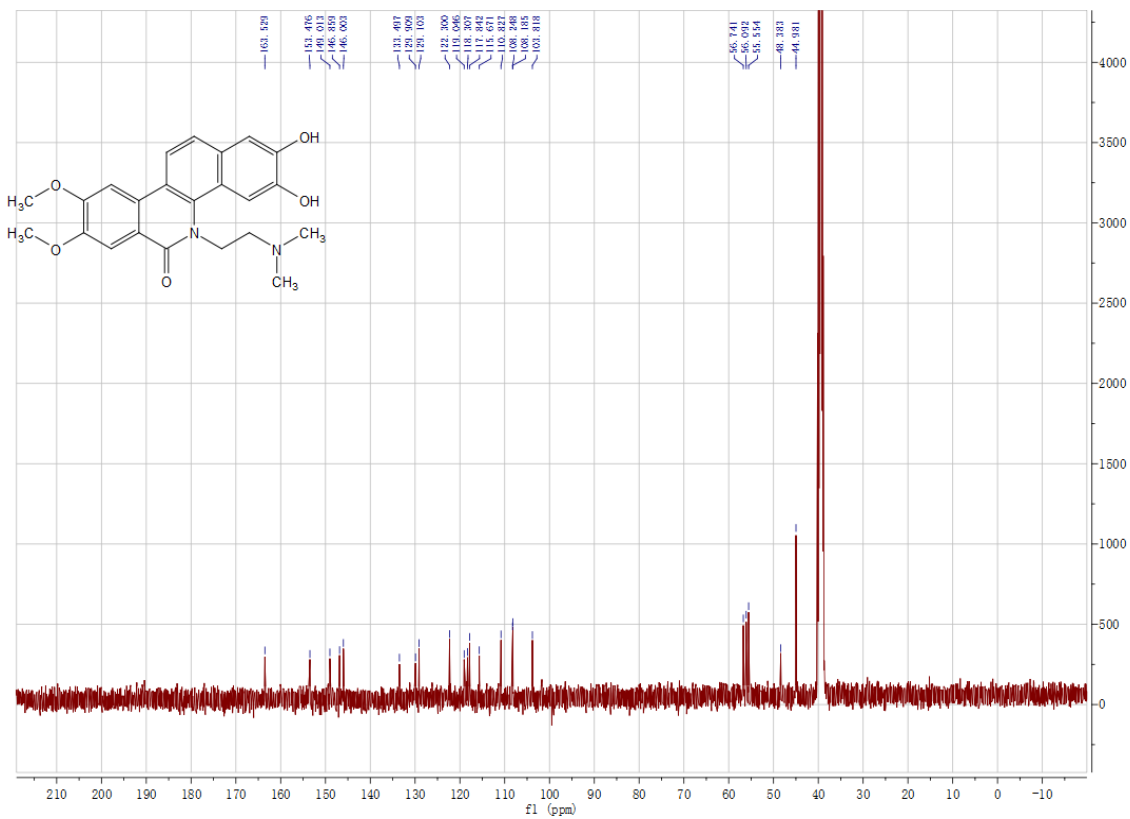

**<sup>1</sup>H NMR and <sup>13</sup>C NMR spectra of compound C30**

## References

- (1) Naya, L.; Vazquez-Garcia, D.; Lopez-Torres, M.; Fernandez, A.; Rodriguez, A.; Gomez-(1) Naya, L.; Vazquez-Garcia, D.; Lopez-Torres, M.; Fernandez, A.; Rodriguez, A.; Gomez-Blanco, N.; Vila, J. M.; Fernandez, J. J. Mononuclear and tetranuclear palladacycles with terdentate [C,N,N] and [C,N,O] Schiff base ligands. C-H versus C-Br activation reactions. *Inorg. Chim. Acta* **2011**, *370*, 89-97.
- (2) Vila, J. M.; Pereira, T.; Ortigueira, J. M.; Amoedo, A.; Grana, M.; Alberdi, G.; Lopez-Torres, M.; Fernandez, A. C-Br versus C-H bond activation in palladium(II) cyclopalladated compounds. Crystal and molecular structure of [Pd{C<sub>6</sub>H<sub>4</sub>C(H)=NCy}(MeCOCHCOMe)]. *J. Organomet. Chem.* **2002**, *663*, 239-248.
- (3) Chang, J. H.; Du, Y. M.; Guo, J. T. Benzamide derivatives as cGAS-STING pathway agonists and their preparation. U.S. Patent WO2020072492A1, Apr 9, 2020.
- (4) Calder, E. D.; McGonagle, F. I.; Harkiss, A. H.; McGonagle, G. A.; Sutherland, A. Preparation of amino-substituted indenes and 1,4-dihydronaphthalenes using a one-pot multireaction approach: total synthesis of oxybenzo[c]phenanthridine alkaloids. *J. Org. Chem.* **2014**, *79*, 7633-7648.
- (5) An, L. K.; Zhang, X. R.; Wang, H. W.; Pommier, Y.; Kiselev, E.; Ravji, A.; Agama, K. Preparation of oxynitidine derivatives useful as dual inhibitors of DNA topoisomerase IB (TOP1) and tyrosyl-DNA phosphodiesterase 1 (TDP1). U.S. Patent WO2020023700A2, Jan 30, 2020.
- (6) An, L. K.; Zhang, X. R.; Wang, H. W.; Tang, W. L.; Hu, D. X.; Zhang, Y. Preparation of fused ring compounds as antitumor agents. China Patent CN110759963A, Feb 7, 2020.
